# Supplementary material
Source: publisher figshare collection journal article supplement (https://acs.figshare.com/ndownloader/files/4652488)

## Supporting Information

### Tin-Free Giese Reaction and the Related Radical Carbonylation Using Alkyl Iodides and Cyanoborohydrides

Ilhyong Ryu,\* Shohei Uehara, Hidefumi Hirao, and Takahide Fukuyama

Department of Chemistry, Graduate School of Science, Osaka Prefecture  
University, Sakai, Osaka 599-8531, Japan

#### Table of Contents

|                                    |         |
|------------------------------------|---------|
| General Information.....           | S2      |
| Typical Procedure A.....           | S2      |
| Typical Procedure B.....           | S3      |
| Typical Procedure C.....           | S3      |
| Deuterium Labeling Experiment..... | S4      |
| Spectroscopic Data.....            | S4-S13  |
| Copies of NMR Spectra.....         | S14-S53 |

**General information.**  $^1\text{H}$  NMR spectra were recorded with a JEOL JMN-ECP500 (500 MHz) spectrometer in  $\text{CDCl}_3$ . Chemical shifts are reported in parts per million ( $\delta$ ) downfield from internal TMS at 0.00.  $^{13}\text{C}$  NMR spectra were recorded with a JEOL JMN-ECP500 (125 MHz) spectrometer and referenced to the solvent peak at 77.00 ppm. Infrared spectra were obtained on a JASCO FT/IR-4100 spectrometer; absorptions are reported in reciprocal centimeters. GC analyses were performed with a Shimadzu GC-18A gas chromatography equipped with column DB-1. GC-MS analyses were performed with a Shimadzu GCMS-QP5050 mass spectrometer. High resolution mass spectra were recorded with a JEOL MS700 spectrometer. The products were purified by flash chromatography on silica gel (Nacalai Tesque Inc. Silica Gel 60, 230-400 mesh) and, if necessary, were further purified by recycling preparative HPLC (Japan Analytical Industry Co. Ltd., LC-908 or LC-918) equipped with GPC columns (JAIGEL-1H + JAIGEL-2H columns) using  $\text{CHCl}_3$  as eluent. Photolysis were carried out using a Pyrex round bottomed flask and using a 500 W Xenon short arc lamp (Ushio Co. Ltd., lamp house: SX-U1500XQ, Xenon short arc lamp: UXL-500SX, power supply: BA-X500). EtOH, MeOH,  $\text{C}_6\text{H}_6$ , THF, acetone,  $\text{Et}_2\text{O}$  were dried and purified by standard distillation techniques. Alkyl iodides **1g**, **1i**, and **1k** were prepared from the corresponding alcohol.<sup>1</sup> **1f** and **1j** were prepared from the corresponding bromides with sodium iodide in dry acetone.<sup>2</sup> **1h** was prepared from 4-bromobenzyl alcohol and 1,5-diiodopentane by Williamson method using sodium hydride. **2g** was prepared via 1-undecen-3-ol, which was obtained by Grignard reaction of n-octylmagnesium bromide with acrolein, followed by Jones oxidation. Alkenes **2a**, **2b**, **2c**, **2d**, **2e**, and **2f** were distilled prior to use. Other reagents were commercially available and used without further purification.

## References

- [1] (a) Olah, G. A.; Narang, S. C.; Gupta, B. G. B.; Malhotra, R. *J. Org. Chem.* **1979**, *44*, 1247; (b) Garcia-Fandiño, R.; Codesido, E. M.; Sobarzo-Sánchez, E.; Castedo, L.; Granja, J. R. *Org. Lett.* **2004**, *6*, 193.
- [2] Daub, G. H.; Castle, R. N.; *J. Org. Chem.* **1954**, *19*, 1571.

## Typical Procedure A: Ethyl Undecanoate (**3a**).

A magnetic stirring bar, 1-iodooctane (**1a**) (239.5 mg, 1.0 mmol), ethyl acrylate (**2a**) (150.0 mg, 1.5 mmol),  $\text{NaBH}_3\text{CN}$  (311.7 mg, 5.0 mmol) and methanol (2.0 mL) were placed in a Pyrex 10 mL round-bottomed flask and the mixture was irradiated by Xenon arc lamp (500

W) with stirring for 3 h under argon. Saturated ammonium chloride aqueous solution (1 mL) was added to the reaction mixture. The mixture was poured into water (20 mL) and extracted with Et<sub>2</sub>O (3 x 20 mL). The organic layer was washed with brine, and dried over Na<sub>2</sub>SO<sub>4</sub>, then filtered and concentrated in vacuo. The residue was separated by flash chromatography on silica gel (gradient from hexane/Et<sub>2</sub>O = 20/1 to hexane/Et<sub>2</sub>O = 10/1). The major fraction contained **3a** (160.7 mg, 75%). The minor fraction contained 2-nonylglutarate (**4a**) (28.8 mg, 9%).

#### **Typical Procedure B: Methyl 4-Oxododecanoate (3i).**

A magnetic stirring bar, AIBN (8.7 mg, 0.053 mmol), *n*-Bu<sub>4</sub>NBH<sub>3</sub>CN (721.5 mg, 2.56 mmol), **1a** (120.1 mg, 0.5 mmol), **2d** (170.1 mg, 1.98 mmol), and methanol (30 mL) were placed in a 100-mL stainless steel autoclave. The autoclave was closed, purged three times with carbon monoxide, pressurized with 91 atm of CO, and then heated at 80 °C for 19 h. Excess CO was discharged at room temperature. Saturated ammonium chloride aqueous solution (10 mL) was added to the reaction mixture. The mixture was poured into water (50 mL) and extracted with Et<sub>2</sub>O (3 x 50 mL). The organic layer was washed with brine, and dried over Na<sub>2</sub>SO<sub>4</sub>, then filtered and concentrated in vacuo. The residue was purified by flash chromatography on silica gel (hexane/AcOEt = 30/1) to give **3i** (70.3 mg, 62%).

#### **Typical Procedure C: 3-Tridecanone (3m).**

A magnetic stirring bar, *n*-Bu<sub>4</sub>NBH<sub>3</sub>CN (311.7 mg, 1.5 mmol), **1a** (118.6 mg, 0.49 mmol), **2f** (127.1 mg, 1.5 mmol), and methanol (1.0 mL) were placed in a Pyrex 10 mL round-bottomed flask and the mixture was irradiated by Xenon arc lamp (500 W) with stirring for 6 h under argon. The solvent was removed under reduced pressure. The residue was purified by flash

chromatography on silica gel (hexane/Et<sub>2</sub>O = 20/1 ) to give **3m** (64.9 mg, 67%).

#### Deuterium Labeling Experiment.

A magnetic stirring bar, **1a** (121.6 mg, 0.51 mmol), **2a** (105.2 mg, 1.1 mmol), NaBD<sub>3</sub>CN (162.3 mg, 4.8 mmol, 96 atom% D) and methanol (1.0 mL) were placed in a pyrex 10 mL round-bottomed flask and irradiated by Xenon arc lamp (500 W) with stirring for 3 h under argon. The reaction mixture was poured into water (20 mL) and extracted with Et<sub>2</sub>O (20 mL x 3). The organic layer was washed with brine, and dried over Na<sub>2</sub>SO<sub>4</sub>, then filtered and concentrated in vacuo. The residue was purified by flash chromatography on silica gel (hexane/ Et<sub>2</sub>O = 20/1) to give **3 a-d** (46.6 mg). Deuterium incorporation was determined by <sup>1</sup>H NMR.

#### Ethyl Undecanoate (3a).

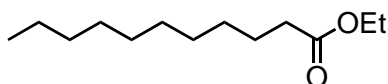

Colorless oil, (*R*<sub>f</sub> = 0.38, hexane/ Et<sub>2</sub>O = 10/1); <sup>1</sup>H NMR (CDCl<sub>3</sub>, 500 MHz) δ 0.88 (t, *J* = 6.9 Hz, 3H), 1.16-1.38 (m, 17H), 1.55-1.68 (m, 2H), 2.29 (t, *J* = 7.6 Hz, 2H), 4.12 (q, *J* = 7.2 Hz, 2H); <sup>13</sup>C NMR (CDCl<sub>3</sub>, 125 MHz) δ 14.05, 14.21, 22.64, 24.96, 29.12, 29.24, 29.27, 29.43, 29.52, 31.86, 34.36, 60.08, 173.85; IR (neat) 1739 cm<sup>-1</sup>; MS (EI) *m/z* (rel intensity) 214 (M<sup>+</sup>, 9), 169 (24), 101 (69), 88 (100), 73 (51), 70(49), 61 (37), 60 (35), 57 (33), 55 (48).

This compound is previously known: Sim, T. C.; Joung, M.; Yoon, N. M. *J. Org. Chem.* **1997**, *62*, 2357.

#### Diethyl 2-Nonylglutarate (4a).

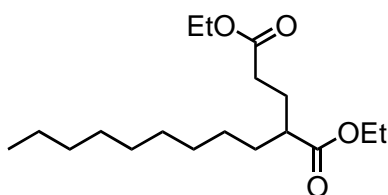

Colorless oil. ( $R_f = 0.23$ , hexane/Et<sub>2</sub>O = 10/1); <sup>1</sup>H NMR (CDCl<sub>3</sub>, 500 MHz)  $\delta$  0.88 (t,  $J = 6.9$  Hz, 3H), 1.16-1.38 (m, 20H), 1.40-1.49 (m, 1H), 1.57-1.66 (m, 1H), 1.78-1.94 (m, 2H), 2.22-2.41 (m, 3H), 3.98-4.20 (m, 4H); <sup>13</sup>C NMR (CDCl<sub>3</sub>, 125 MHz)  $\delta$  14.07, 14.19, 14.28, 22.64, 27.18, 29.26, 29.41, 29.46, 29.49, 31.85, 32.06, 32.30, 44.82, 60.19, 60.34, 173.06, 175.69 (Two signals accidentally superposed each other.); IR (neat) 1736 cm<sup>-1</sup>; MS (EI)  $m/z$  (rel intensity) 269 (M<sup>+</sup>-OEt, 48), 198 (42), 188 (59), 152 (47), 142 (100), 114 (83), 101 (37), 98 (32), 97 (37), 88 (47), 83 (53), 81 (36), 55 (90); HRMS calcd for C<sub>18</sub>H<sub>34</sub>O<sub>4</sub> (M<sup>+</sup>) 314.2457, found 314.2452.

#### Methyl 3-Methylundecanoate (3b).

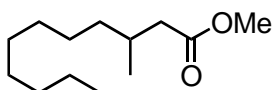

Yellow oil, ( $R_f = 0.2$ , hexane/ Et<sub>2</sub>O = 20/1); <sup>1</sup>H NMR (CDCl<sub>3</sub>, 500 MHz)  $\delta$  0.88 (t,  $J = 6.9$  Hz, 3H), 0.93 (d,  $J = 6.4$  Hz, 3H), 1.13-1.35 (m, 14H), 1.88-1.99 (m, 1H), 2.10 (dd,  $J = 14.7, 7.8$  Hz, 1H), 2.30 (dd,  $J = 14.7, 6.0$  Hz, 1H), 3.66 (s, 3H); <sup>13</sup>C NMR (CDCl<sub>3</sub>, 125 MHz)  $\delta$  14.07, 19.72, 22.66, 26.89, 29.28, 29.56, 29.73, 30.33, 31.88, 36.72, 41.66, 51.29, 173.78; IR (neat) 1742 cm<sup>-1</sup>; MS (EI)  $m/z$  (rel intensity) 214 (M<sup>+</sup>, 6), 183 (14), 157 (11), 101 (47), 74 (100), 69 (28), 59 (26).

This compound is previously known: Sim, T. C.; Joung, M.; Yoon, N. M. *J. Org. Chem.* **1997**, *62*, 2357.

#### Methyl 2-Methylundecanoate (3c).

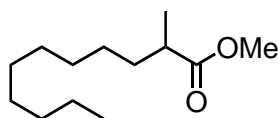

Colorless oil, ( $R_f = 0.40$ , hexane/ Et<sub>2</sub>O = 20/1); <sup>1</sup>H NMR (CDCl<sub>3</sub>, 500 MHz)  $\delta$  0.88 (t,  $J = 7.1$  Hz, 3H), 1.14 (d,  $J = 6.9$  Hz, 3H), 1.20-1.33 (m, 14H), 1.34-1.45 (m, 1H), 1.59-1.70 (m, 1H), 2.43 (sext,  $J = 7.0, 7.0$  Hz, 1H), 3.67 (s, 3H); <sup>13</sup>C NMR (CDCl<sub>3</sub>, 125 MHz)  $\delta$  14.07, 17.03, 22.66, 27.23, 29.28, 29.47, 29.49, 29.53, 31.88, 33.82, 39.44, 51.39, 177.37; IR (neat) 1741 cm<sup>-1</sup>; MS (EI)  $m/z$  (rel intensity) 214 ( $M^+$ , 5), 157 (17), 143 (13), 101 (57), 89 (13), 88 (100), 71 (12), 69 (23), 59 (23), 57 (48), 55 (40).

This compound is previously known: Sim, T. C.; Joung, M.; Yoon, N. M. *J. Org. Chem.* **1997**, 62, 2357.

#### Ethyl 3-Cyclohexylpropionate (3d).

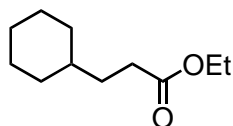

Colorless oil, ( $R_f = 0.32$ , hexane/ Et<sub>2</sub>O = 10/1); <sup>1</sup>H NMR (CDCl<sub>3</sub>, 500 MHz)  $\delta$  0.81-0.91 (m, 2H), 1.05-1.29 (m, 7H), 1.48-1.55 (m, 2H), 1.60-1.74 (m, 5H), 2.30 (t,  $J = 8.0$  Hz, 2H), 4.12 (q,  $J = 7.0$  Hz, 2H); <sup>13</sup>C NMR (CDCl<sub>3</sub>, 125 MHz)  $\delta$  14.00, 26.03, 26.34, 31.69, 32.17, 32.78, 37.05, 59.84, 173.76; IR (neat) 1735 cm<sup>-1</sup>; MS (EI)  $m/z$  (rel intensity) 184 ( $M^+$ , 1), 139 (14), 121 (20), 101 (100), 88 (81), 73 (42), 55 (95).

This compound is previously known: Shukla, P.; Hsu, Y-C.; Cheng, C-H. *J. Org. Chem.* **2006**, 71, 655.

#### Ethyl 3-(1-Adamantyl)propionate (3e).

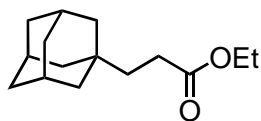

Colorless oil, ( $R_f$  = 0.30, hexane/ Et<sub>2</sub>O = 10/1); <sup>1</sup>H NMR (CDCl<sub>3</sub>, 500 MHz)  $\delta$  1.26 (t,  $J$  = 7.1 Hz, 3H), 1.37-1.49 (m, 7H), 1.58-1.65 (m, 3H), 1.66-1.74 (m, 3H), 1.95 (m, 3H), 2.22-2.28 (m, 2H) 4.12 (q,  $J$  = 7.2 Hz, 2H); <sup>13</sup>C NMR (CDCl<sub>3</sub>, 125 MHz)  $\delta$  14.14, 28.08, 28.37, 31.80, 36.97, 38.86, 41.93, 60.08, 174.55; IR (neat) 1738 cm<sup>-1</sup>; MS (EI)  $m/z$  (rel intensity) 236 (M<sup>+</sup>, 34), 191 (33), 135 (100), 107 (39), 93 (51), 91 (40), 79 (54), 67 (31).

This compound is previously known: Yamazaki, O.; Togo, H.; Matubayashi, S.; Yokoyama, M. *Tetrahedron* **1999**, 55, 3735.

#### Ethyl 5,5-Diethoxypentanoate (3f).

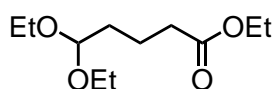

Colorless oil, ( $R_f$  = 0.48, hexane/AcOEt = 5/1); <sup>1</sup>H NMR (CDCl<sub>3</sub>, 500 MHz)  $\delta$  1.20 (t,  $J$  = 7.1 Hz, 6H), 1.25 (t,  $J$  = 7.1 Hz, 3H), 1.61-1.74 (m, 4H), 2.33 (t,  $J$  = 7.3 Hz, 2H), 3.45-3.53 (m, 2H), 3.61-3.68 (m, 2H), 4.13 (q,  $J$  = 7.2 Hz, 2H), 4.49 (t,  $J$  = 5.5 Hz, 1H); <sup>13</sup>C NMR (CDCl<sub>3</sub>, 125 MHz)  $\delta$  14.06, 15.14, 20.09, 32.80, 33.81, 60.03, 60.84, 102.37, 173.25; IR (neat) 1737 cm<sup>-1</sup>; MS (EI)  $m/z$  (rel intensity) 173 (M<sup>+</sup>-OEt, 6), 127 (11), 103 (11), 99 (16), 97 (32), 85 (100), 75 (11), 73 (13), 70 (22), 57 (46).

This compound is previously known. See the reference; Paolobelli, A. B.; Ruzziconi, R. *J. Org. Chem.* **1996**, 61, 6434.

#### Ethyl 11-Chloroundecanoate (3g).

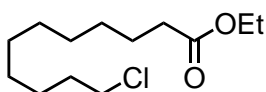

Colorless oil, ( $R_f = 0.20$ , hexane/ Et<sub>2</sub>O = 10/1); <sup>1</sup>H NMR (CDCl<sub>3</sub>, 500 MHz)  $\delta$  1.20-1.34 (m, 10 H), 1.25 (t,  $J = 7.1$  Hz, 3H), 1.36-1.46 (m, 2H), 1.56-1.66 (m, 2H), 1.76 (quint,  $J = 7.1$  Hz, 2H), 2.28 (t,  $J = 7.6$  Hz, 2H), 3.52 (t,  $J = 6.7$  Hz, 2H), 4.12 (q,  $J = 7.0$  Hz, 2H); <sup>13</sup>C NMR (CDCl<sub>3</sub>, 125 MHz)  $\delta$  14.15, 24.86, 26.76, 28.75, 29.00, 29.10, 29.21, 29.27, 32.54, 34.24, 44.98, 60.00, 173.67; IR (neat) 1737 cm<sup>-1</sup>; MS (EI)  $m/z$  (rel intensity) 248 (M<sup>+</sup>, 1), 205 (12), 203 (21), 115 (14), 101 (64), 88 (100), 83 (22), 73 (41), 70 (47), 60 (45), 57 (27), 55 (68); HRMS calcd for C<sub>13</sub>H<sub>25</sub><sup>35</sup>ClO<sub>2</sub> (M<sup>+</sup>) 248.1543, found 248.1546.

**5-(4-Bromobenzyloxy)pentyl iodide (1h).**

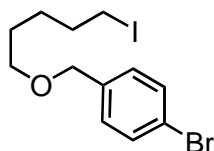

Pale yellow oil. ( $R_f = 0.48$ , hexane/ Et<sub>2</sub>O = 10/1); <sup>1</sup>H NMR (CDCl<sub>3</sub>, 500 MHz)  $\delta$  1.45-1.53 (m, 2H), 1.59-1.68 (m, 2H), 1.85 (quint,  $J = 7.2$  Hz, 2H), 3.19 (t,  $J = 6.9$  Hz, 2H), 3.46 (t,  $J = 6.4$  Hz, 2H), 4.44 (s, 2H), 7.18-7.24 (m, 2H), 7.44-7.50 (m, 2H); <sup>13</sup>C NMR (CDCl<sub>3</sub>, 125 MHz)  $\delta$  6.82, 27.20, 28.62, 33.24, 70.12, 72.12, 121.32, 129.18, 131.42, 137.52; IR (neat) 2931, 1641 cm<sup>-1</sup>; MS (EI)  $m/z$  (rel intensity) 382 (M<sup>+</sup>, 1), 171 (69), 169 (100), 91 (14), 90 (24), 89 (24), 63 (11); HRMS calcd for C<sub>12</sub>H<sub>16</sub><sup>79</sup>BrIO (M<sup>+</sup>) 381.9429, found 381.9426.

**Ethyl 8-[(4-bromophenyl)methoxy]octanoate (3h).**

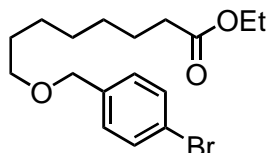

Colorless oil, ( $R_f = 0.30$ , hexane/ Et<sub>2</sub>O = 5/1); <sup>1</sup>H NMR (CDCl<sub>3</sub>, 500 MHz)  $\delta$  1.25 (t,  $J = 7.1$  Hz, 3H), 1.28-1.40 (m, 6H), 1.55-1.66 (m, 4H), 2.28 (t,  $J = 7.6$  Hz, 2H), 3.44 (t,  $J = 6.6$  Hz, 2H), 4.12 (q,  $J = 7.2$ , 2H), 4.43 (s, 2H), 7.16-7.24 (m, 2H), 7.42-7.48 (m, 2H); <sup>13</sup>C NMR



(CDCl<sub>3</sub>, 125 MHz)  $\delta$  14.14, 24.76, 25.87, 28.92, 28.95, 29.53, 34.18, 59.99, 70.4, 71.92, 121.13, 129.09, 131.28, 137.61, 173.62; IR (neat) 1735 cm<sup>-1</sup>; MS (EI)  $m/z$  (rel intensity) 356 (M<sup>+</sup>, 2), 277 (18), 207 (15), 185 (13), 171 (100), 169 (74), 125 (42), 101 (58), 97 (34), 90 (31), 88 (38), 55 (50); HRMS calcd for C<sub>17</sub>H<sub>25</sub><sup>79</sup>BrO<sub>3</sub> (M<sup>+</sup>) 356.0987, found 356.0991.

**Methyl 4-Oxododecanoate (3i).**

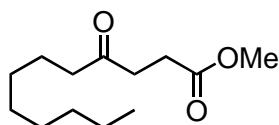

Yellow oil; ( $R_f$  = 0.25, hexane/ AcOEt = 8/1); <sup>1</sup>H NMR (CDCl<sub>3</sub>, 500 MHz)  $\delta$  0.88 (t,  $J$  = 6.9 Hz, 3H), 1.19-1.33 (m, 10H), 1.53-1.63 (m, 2H), 2.44 (t,  $J$  = 7.6 Hz, 2H), 2.59 (t,  $J$  = 6.7 Hz, 2H), 2.72 (t,  $J$  = 6.7, 2H), 3.68 (s, 3H); <sup>13</sup>C NMR (CDCl<sub>3</sub>, 125 MHz)  $\delta$  14.01, 22.57, 23.76, 27.66, 29.06, 29.14, 29.29, 31.75, 36.95, 42.75, 51.67, 173.24, 209.04.

This compound is previously known: Kishimoto, Y.; Ikariya, T. *J. Org. Chem.* **2000**, 65, 7656.

**Methyl 4-Oxo-4-cyclohexylbutanoate (3j).**

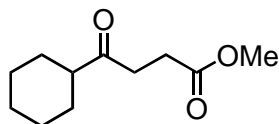

Colorless oil; ( $R_f$  = 0.25, hexane/ AcOEt = 5/1); <sup>1</sup>H NMR (CDCl<sub>3</sub>, 500 MHz)  $\delta$  1.10-1.42 (m, 5H), 1.60-1.70 (m, 1H), 1.72-1.81 (m, 2H), 1.82-1.92 (m, 2H), 2.34-2.42 (m, 1H), 2.58 (t,  $J$  = 6.6 Hz, 2H), 2.76 (t,  $J$  = 6.4 Hz, 2H), 3.67 (s, 3H); <sup>13</sup>C NMR (CDCl<sub>3</sub>, 125 MHz)  $\delta$  25.53, 25.75, 27.62, 28.38, 34.90, 50.62, 51.62, 173.29, 211.88.

This compound is previously known: Ryu, I.; Kusano, K.; Yamazaki, H. *J. Org. Chem.* **1991**, 56, 5003.

**Ethyl 4-Oxo-4-(1-adamantyl)butanoate (3k).**

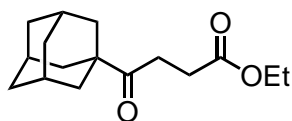

Colorless oil; ( $R_f$  = 0.38, hexane/ AcOEt = 5/1);  $^1\text{H}$  NMR ( $\text{CDCl}_3$ , 500 MHz)  $\delta$  1.25 (t,  $J$  = 7.1 Hz, 3H), 1.64-1.72 (m, 3H), 1.72-1.78 (m, 3H), 1.82-1.86 (m, 6H), 2.01-2.08 (m, 3H), 2.55 (t,  $J$  = 6.7 Hz, 2H), 2.77 (t,  $J$  = 6.3 Hz, 2H), 4.12 (q,  $J$  = 7.2 Hz);  $^{13}\text{C}$  NMR ( $\text{CDCl}_3$ , 125 MHz)  $\delta$  14.12, 27.88, 28.50, 30.98, 36.48, 38.22, 46.07, 60.40, 172.99, 213.66.

This compound is previously known: Cai, Y.; Roberts, B. P.; Tocher, D. A.; Barnett, S. A. *Org. Biomol. Chem.* **2004**, 2, 2517.

**Undecanenitrile (3l).**

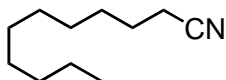

Colorless oil, ( $R_f$  = 0.18, hexane/  $\text{Et}_2\text{O}$  = 20/1);  $^1\text{H}$  NMR ( $\text{CDCl}_3$ , 500 MHz)  $\delta$  0.88 (t,  $J$  = 6.9 Hz, 3H), 1.21-1.37 (m, 12H), 1.39-1.49 (m, 2H), 1.66 (quint,  $J$  = 7.5 Hz, 2H), 2.33 (t,  $J$  = 7.3 Hz, 2H);  $^{13}\text{C}$  NMR ( $\text{CDCl}_3$ , 125 MHz)  $\delta$  13.98, 17.00, 22.55, 25.28, 28.56, 28.66, 29.14, 29.20, 29.35, 31.75, 119.72; IR (neat) 2926, 2247  $\text{cm}^{-1}$ ; MS (EI)  $m/z$  (rel intensity) 152 ( $\text{M}^+ - \text{CH}_3$ , 4), 138 (21), 124 (53), 110 (78), 96 (94), 82 (100), 69 (82), 57 (89), 55 (97).

This compound is previously known: Blay, G.; Cardona, L.; Garcia, B.; Lahoz, L.; Pedro, J. R. *Tetrahedron* **1996**, 52, 8611.

**3-Tridecanone (3m).**

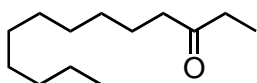

White solid,  $\text{Mp}$  < 30°C; ( $R_f$  = 0.30, hexane/  $\text{Et}_2\text{O}$  = 5/1);  $^1\text{H}$  NMR ( $\text{CDCl}_3$ , 500 MHz)  $\delta$  0.88 (t,

$J = 6.9$  Hz, 3H), 1.05 (t,  $J = 7.3$  Hz, 3H), 1.20-1.34 (m, 14H), 1.52-1.61 (m, 2H), 2.39 (t,  $J = 7.3$  Hz, 2H), 2.42 (q,  $J = 7.3$ , 2H);  $^{13}\text{C}$  NMR ( $\text{CDCl}_3$ , 125 MHz)  $\delta$  7.83, 14.08, 22.66, 23.96, 29.27, 29.29, 29.40, 29.46, 29.55, 31.88, 35.83, 42.44, 211.96; IR (neat)  $1718\text{ cm}^{-1}$ ; MS (EI)  $m/z$  (rel intensity) 198 ( $\text{M}^+$ , 2), 169 (47), 95 (17), 85 (45), 72 (100), 57 (97), 55 (27).

This compound is previously known: Zhang, D.; Ready, J. M. *Org. Lett.* **2005**, 7, 5681.

### 6-Butyl-3-decanone (3n).

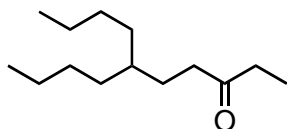

Colorless oil, ( $R_f = 0.43$ , hexane/  $\text{Et}_2\text{O} = 10/1$ );  $^1\text{H}$  NMR ( $\text{CDCl}_3$ , 500 MHz)  $\delta$  0.89 (t,  $J = 6.9$  Hz, 6H), 1.05 (t,  $J = 7.3$  Hz, 3H), 1.16-1.40 (m, 14H), 1.49-1.56 (m, 2H), 2.34-2.39 (m, 2H), 2.40 (q,  $J = 7.3$  Hz, 2H);  $^{13}\text{C}$  NMR ( $\text{CDCl}_3$ , 125 MHz)  $\delta$  7.87, 14.09, 23.07, 27.59, 28.81, 33.09, 35.80, 37.00, 39.81, 212.18; IR (neat)  $1717\text{ cm}^{-1}$ ; MS (EI)  $m/z$  (rel intensity) 183 ( $\text{M}^+ - \text{Et}$ , 32), 165 (14), 140 (33), 109 (26), 85 (89), 72 (64), 57 (100); HRMS calcd for  $\text{C}_{14}\text{H}_{28}\text{O}$  ( $\text{M}^+$ ) 212.2140, found 212.2142.

### 5-Adamantyl-3-pentanone (3o).

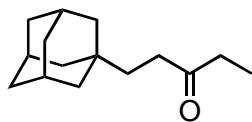

Pale yellow oil, ( $R_f = 0.18$ , hexane/  $\text{Et}_2\text{O} = 15/1$ );  $^1\text{H}$  NMR ( $\text{CDCl}_3$ , 500 MHz)  $\delta$  1.04 (t,  $J = 7.4$  Hz, 3H), 1.30-1.37 (m, 2H), 1.41-1.48 (m, 6H), 1.57-1.64 (m, 3H), 1.66-1.74 (m, 3H), 1.90-1.97 (m, 3H), 2.31-2.37 (m, 2H), 2.42 (q,  $J = 7.3$  Hz, 2H);  $^{13}\text{C}$  NMR ( $\text{CDCl}_3$ , 125 MHz)  $\delta$  7.95, 28.61, 31.80, 35.81, 36.03, 37.08, 37.88, 42.17, 212.55; IR (neat)  $1715\text{ cm}^{-1}$ ; MS (EI)  $m/z$  (rel intensity) 220 ( $\text{M}^+$ , 3), 202 (28), 191 (67), 173 (37), 135 (100), 107 (21), 93 (39), 91

(30), 79 (48), 67 (25), 57 (41); HRMS calcd for C<sub>15</sub>H<sub>24</sub>O<sub>1</sub> (M<sup>+</sup>) 220.1827, found 220.1830.

**1-(1,3-Dioxan-2-yl)-5-tridecanone (3p).**

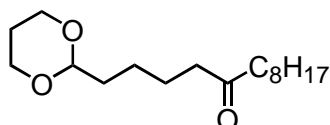

Colorless solid, Mp = 30–31 °C; (R<sub>f</sub> = 0.35, hexane/AcOEt = 5/2); <sup>1</sup>H NMR (CDCl<sub>3</sub>, 500 MHz) δ 0.88 (t, *J* = 7.1 Hz, 3H), 1.20-1.43 (m, 13H), 1.51-1.63 (m, 6H), 2.00-2.12 (m, 1H), 2.34-2.42 (m, 4H), 3.71-3.79 (m, 2H), 4.05-4.12 (m, 2H), 4.51 (t, *J* = 5.3 Hz, 1H); <sup>13</sup>C NMR (CDCl<sub>3</sub>, 125 MHz) δ 14.02, 22.57, 23.52, 23.56, 23.82, 25.78, 29.07, 29.20, 29.31, 31.75, 34.86, 42.55, 42.77, 66.81, 102.01, 211.27; IR (neat) 1705 cm<sup>-1</sup>; MS (EI) *m/z* (rel intensity) 284 (M<sup>+</sup>, 1), 128 (49), 110 (12), 87 (100), 57 (21); HRMS calcd for C<sub>18</sub>H<sub>32</sub>O<sub>3</sub> (M<sup>+</sup>) 284.2351, found 284.2350.

**Ethyl 2-(Ethoxycarbonyl)cyclopentanebutanoate (3q).**

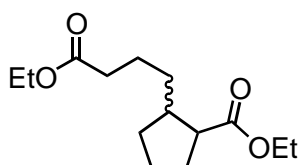

Obtained as a *cis/trans*-isomer mixture in a 67/33 ratio, as determined by GC analysis of the crude reaction mixture. The *cis*- and *trans*-isomers of **3q** were separated using a preparative HPLC. *Cis*-isomer: Colorless oil, (R<sub>f</sub> = 0.30, hexane/AcOEt = 10/1); <sup>1</sup>H NMR (CDCl<sub>3</sub>, 500 MHz) δ 1.19-1.28 (m, 7H), 1.33-1.49 (m, 2H), 1.50-1.74 (m, 3H), 1.75-1.98 (m, 4H), 2.02-2.12 (m, 1H), 2.21-2.34 (m, 2H), 2.78-2.85 (m, 1H), 4.06-4.17 (m, 4H); <sup>13</sup>C NMR (CDCl<sub>3</sub>, 125 MHz) δ 14.21, 14.31, 23.77, 24.00, 28.35, 30.61, 30.97, 34.45, 43.44, 47.51, 59.84, 60.17, 173.57, 175.40; IR (neat) 1733 cm<sup>-1</sup>; MS (EI) *m/z* (rel intensity) 211 (M<sup>+</sup>-OEt,

50), 183 (30), 169 (69), 136 (55), 119 (42), 114 (53), 95 (100), 73 (41), 67 (67), 55 (51); HRMS calcd for  $C_{14}H_{24}O_4$  ( $M^+$ ) 256.1675, found 256.1683. *Trans*-isomer: Colorless oil, ( $R_f$  = 0.30, hexane/AcOEt = 10/1);  $^1H$  NMR ( $CDCl_3$ , 500 MHz)  $\delta$  1.16-1.35 (m, 8H), 1.47-1.74 (m, 5H), 1.78-1.97 (m, 3H), 2.05-2.15 (m, 1H), 2.23-2.35 (m, 3H), 4.09-4.18 (m, 4H);  $^{13}C$  NMR ( $CDCl_3$ , 125 MHz)  $\delta$  14.23, 14.29, 23.64, 24.74, 30.33, 32.48, 34.45, 34.77, 44.01, 50.39, 60.18, 60.20, 173.64, 176.58; IR (neat)  $1732\text{ cm}^{-1}$ ; MS (EI)  $m/z$  (rel intensity) 211 ( $M^+$ -OEt, 57), 182 (58), 169 (61), 136 (100), 95 (97), 67 (72), 55 (48); HRMS calcd for  $C_{14}H_{24}O_4$  ( $M^+$ ) 256.1675, found 256.1669.

The configuration of **3q** was assigned by comparison with  $^1H$  NMR spectra of methyl 2-ethylcyclopentanecarboxylate, see: Canonne, P.; Plamondon, J. *Can. J. Chem.* **1989**, 67, 555.

**ACQUISITION PARAMETERS**  
 File Name = 1d\_spectrum.5262  
 Author =  
 Sample ID = 800-054-216-9  
 Sample Description = 800-054-216-9  
 Creation Date = 5-22-2006 22:59:41  
 Revision Date = 7-22-2006 05:13:08  
 Spec Site = MCP500  
 Spec Type = 1D 1H  
 Data Format = 1D COMPLEX  
 Dimensions = 1H  
 Data Title = 16384  
 Data Size = 16384  
 Data Units = [ppm]  
 Mod\_Return = 1  
 X\_domain = 1H  
 X\_offset = 5[ppm]  
 X\_freq = 900.16241602 [MHz]  
 X\_gamma = 1.00000000 [Hz]  
 Solvent = CDCl3  
 Spin\_get = 13 [Hz]  
 Temp\_get = 22.4 [degC]  
 Acqr\_gain = 27  
 P1d\_strength = 11.7473579 [V]  
 P1d\_offset = 0.00000000 [Hz]  
 Filter\_width = 3.75119936 [Hz]

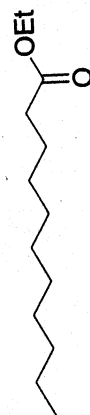

3a

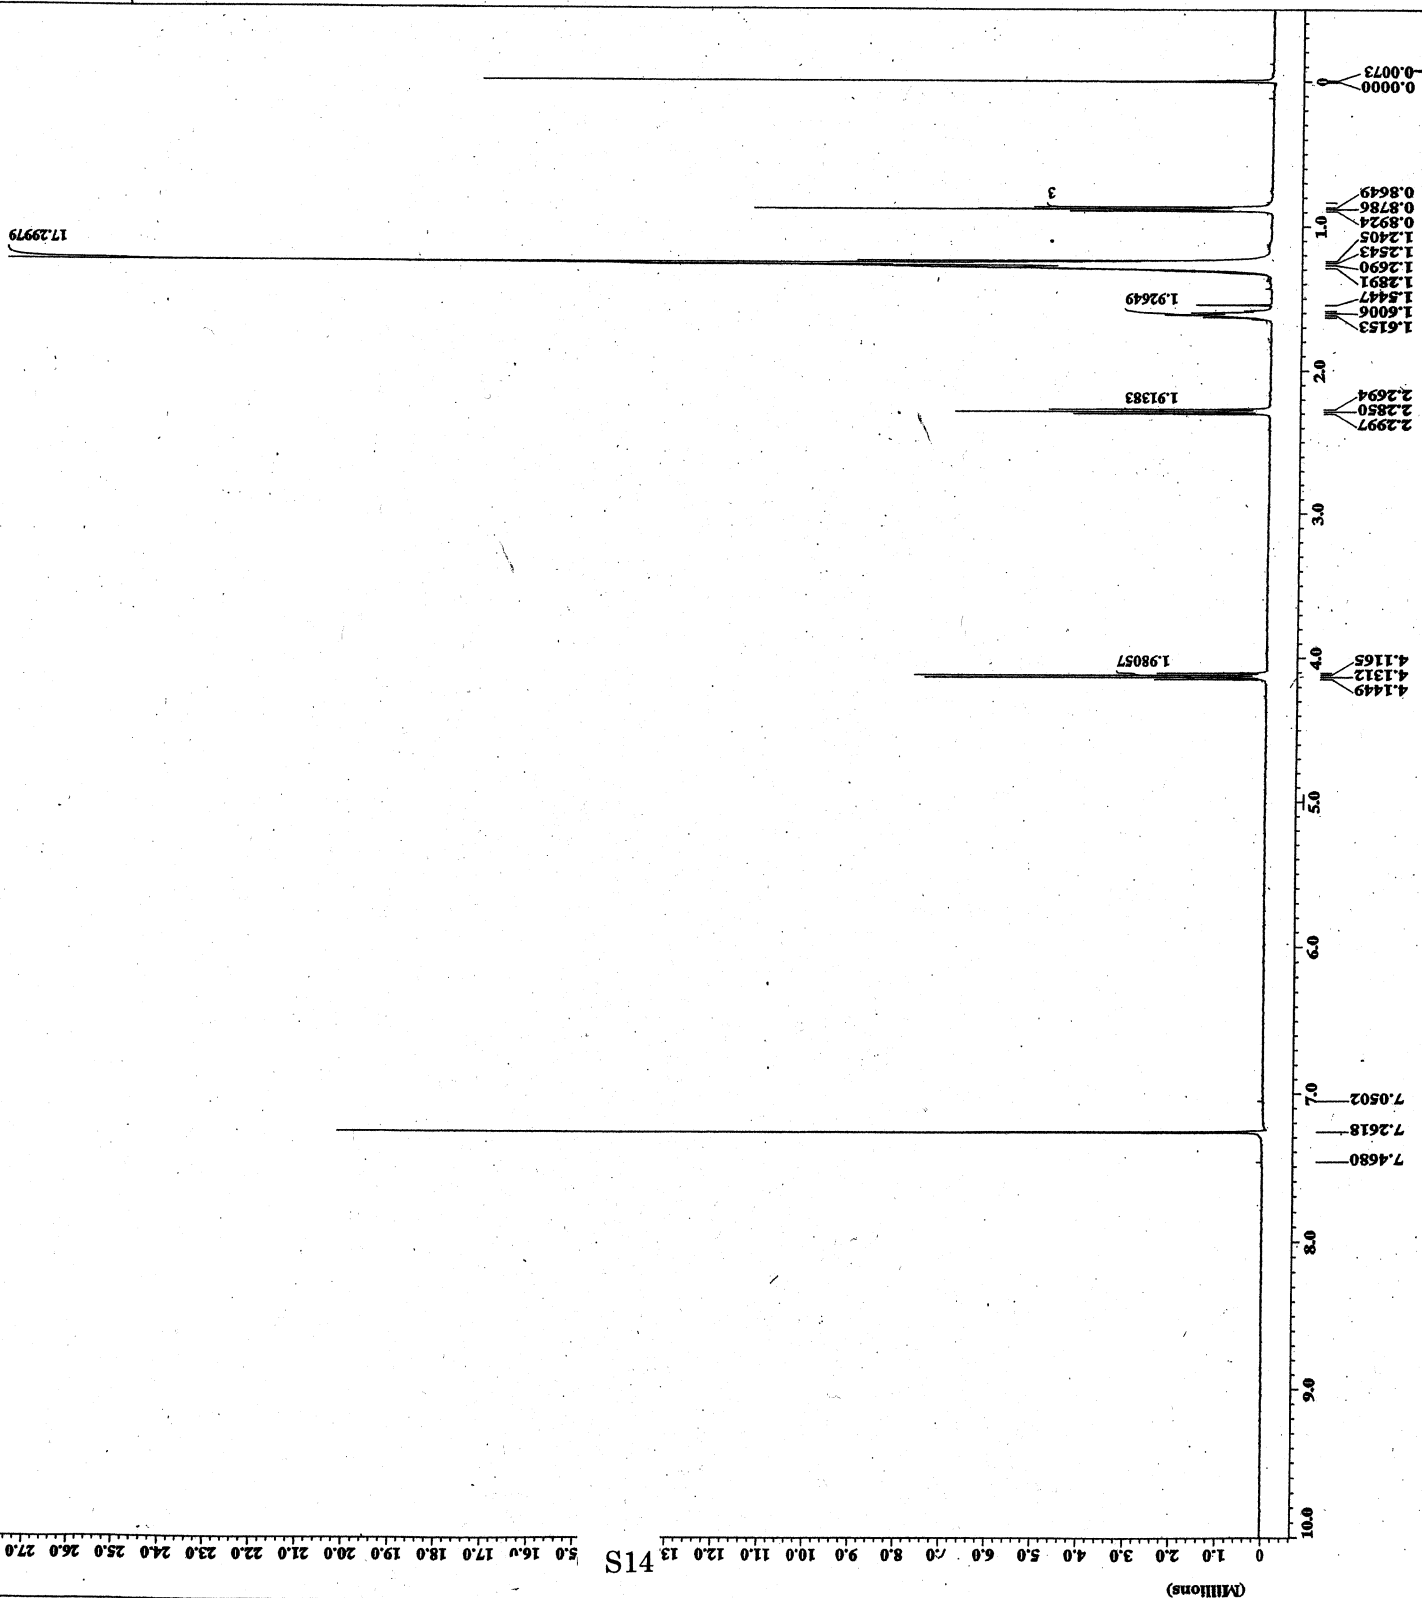

----- ACQUISITION PARAMETERS -----  
 File Name = 14\_13c\_spectrum.74  
 Author =  
 Sample ID =  
 Constant =  
 Creation Date = 14-JUN-2007 10:28:35  
 Revision Date = 16-JUN-2007 01:41:57  
 Spec Site = MCF500  
 Spec Type = 1H/13C\_MMR  
 Data Format = 1D COMPLEX  
 Dimensions =  
 Dia Title =  
 Dia Size = 32768  
 Dia Units =  
 Summ = 32  
 Mod\_return = 1  
 X\_domain = 13C  
 X\_offset = 100.0ppm  
 X\_freq = 125.7779347 [MHz]  
 X\_prog = zgpg30 [Pulse Prg]  
 Solvent = CDCl3/acetone-d6  
 Spin\_get = 14 [Hz]  
 Temp\_get = 25.3 [deg]  
 Acq\_gain = 30  
 Acq\_resolution = 11.7473579 [Hz]  
 Filter\_width = 15.7206221 [Hz]  
 Filter\_shape =

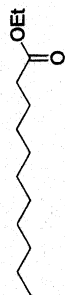

3a

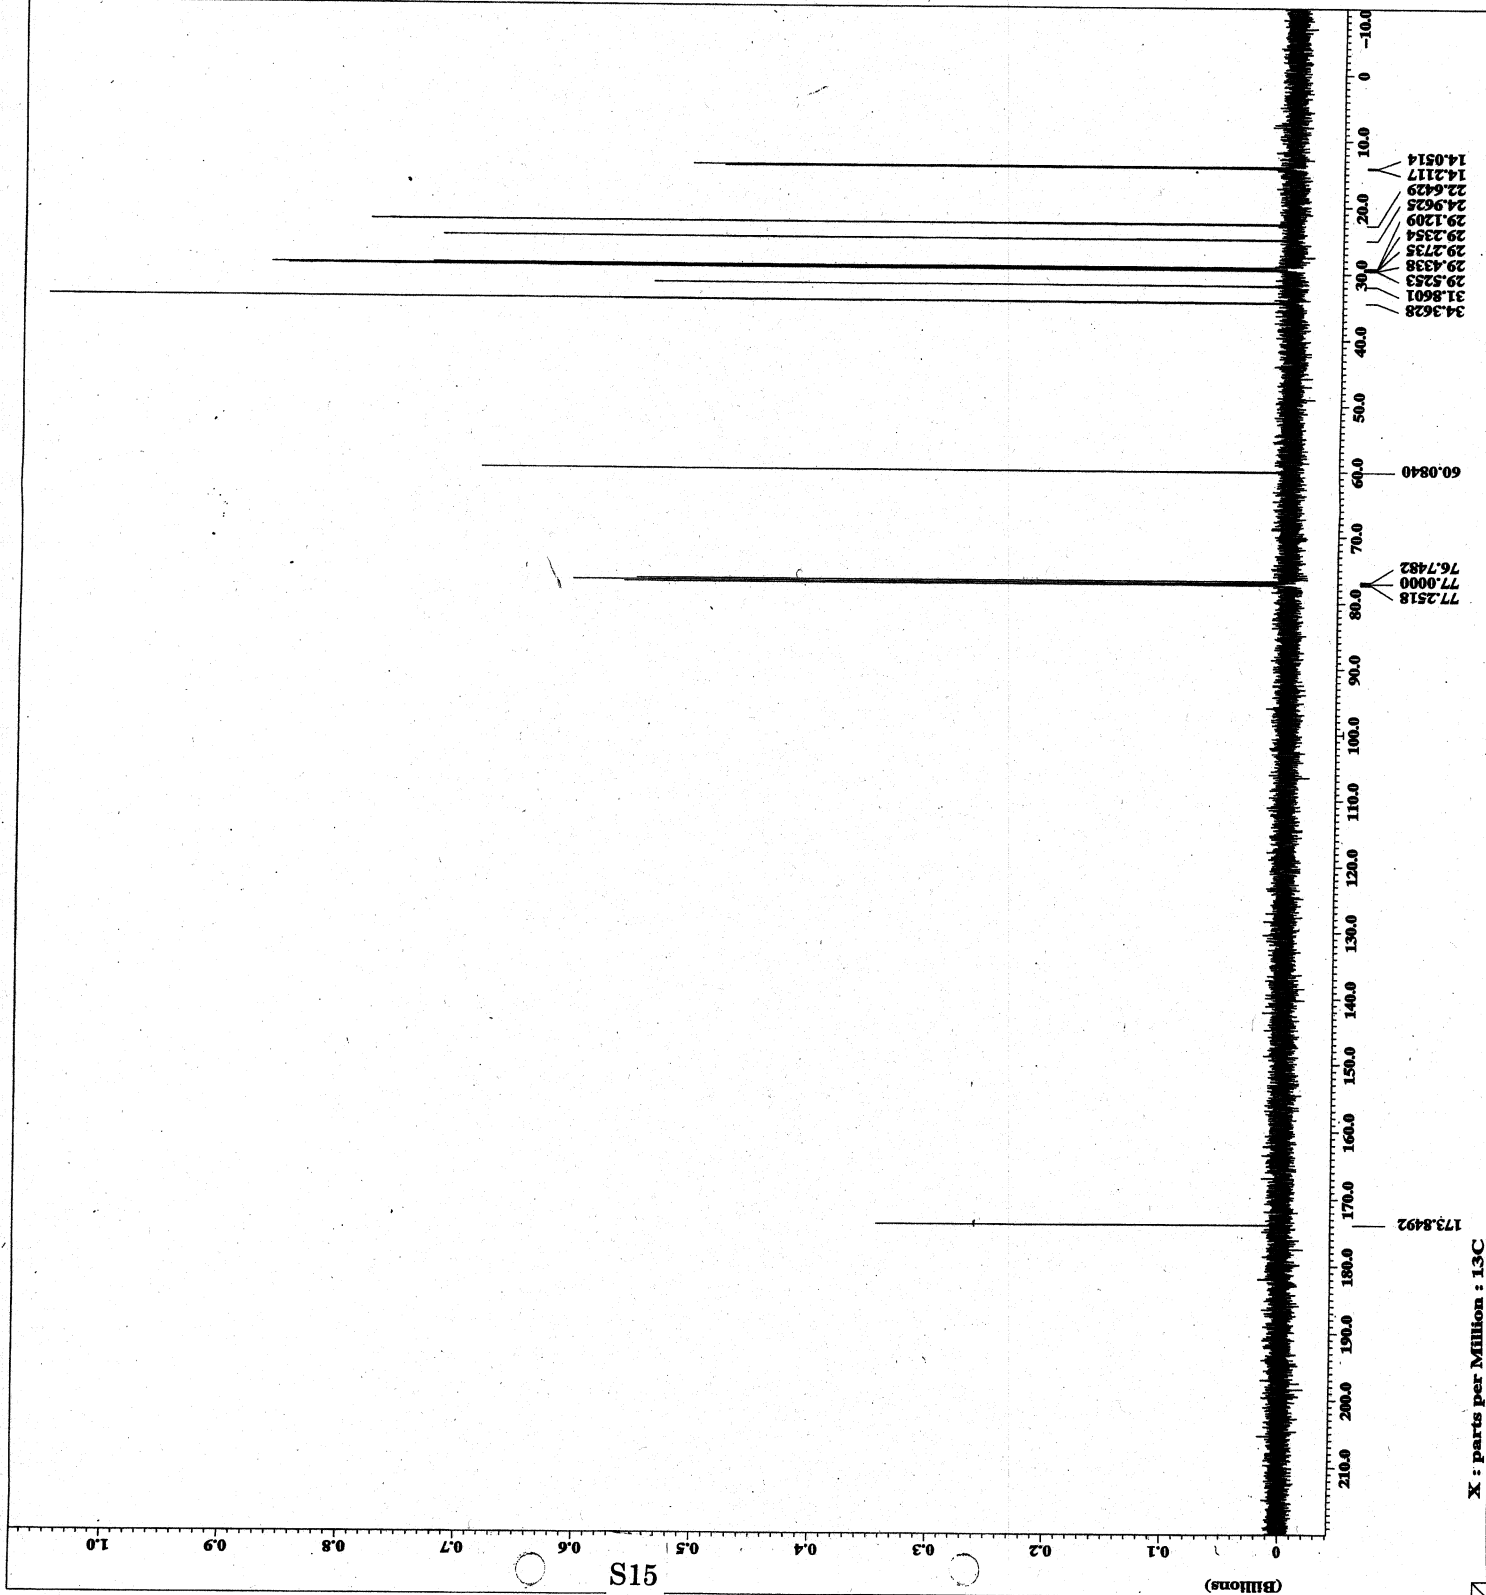

--- ACQUISITION PARAMETERS ---  
 File Name = id\_spectrum.3263  
 Author =  
 Sample ID = MW-494-2122-15  
 Creation Date = 5-28-2006 21:06:07  
 Revision Date = 7-28-2006 05:18:13  
 Spec File = 207500  
 Spec Type = 1H  
 Data Format = 1D  
 Dimensions = 1  
 Dim Title = 16384  
 Dim Size = 16384  
 Dim Units = [ppm]  
 Mod\_Return = 1  
 X\_domain = 1  
 X\_offset = 5 [ppm]  
 X\_freq = 500.13241602 [MHz]  
 X\_gain = 7.57581 [dB]  
 Solvent = CDCl3  
 Spin\_set = 15 [Hz]  
 Temp\_set = 22.5 [deg]  
 Acq\_gain = 21  
 Acq\_offset = 21.7473579 [Hz]  
 Filter\_width = 3.75115936 [Hz]

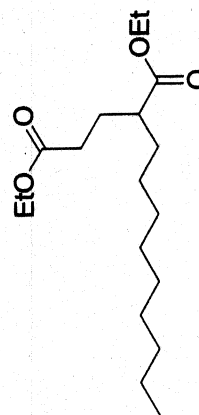

4a

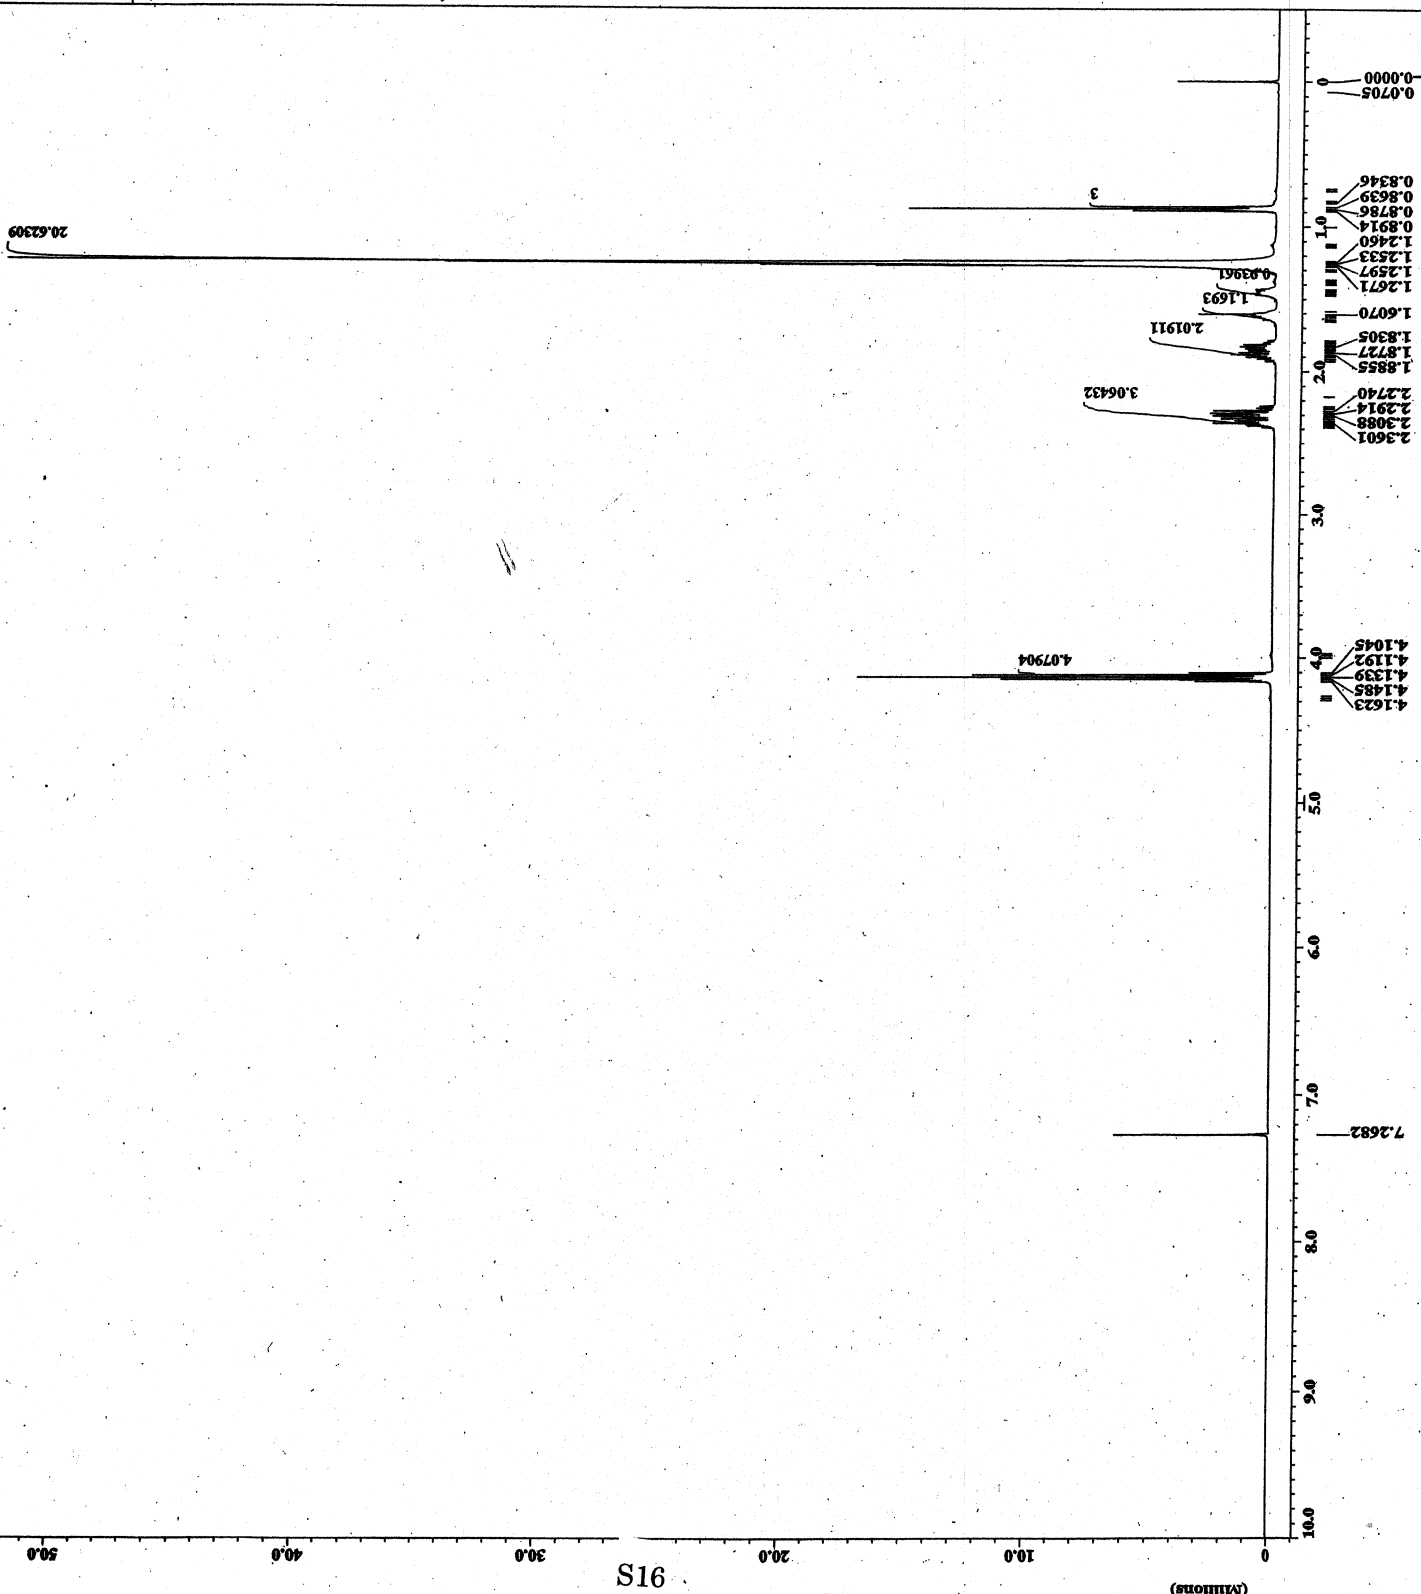



ACQUISITION PARAMETERS  
 File Name : 14\_13c\_spectrum.75  
 Author :  
 Sample ID : 4a  
 Comment : Single Pulse with Broad  
 Creation Date : 14-JUN-2007 10:51:09  
 Revision Date : 16-JUN-2007 02:05:13  
 Spec Site : ECP500  
 Spec Type : DELTA\_90X  
 Data Format : 1D COMPLEX  
 Dimensions : x  
 Dim Title : 13C  
 Dim Size : 27768  
 Dim Units : Hz  
 Scans : 400  
 Mod\_return : 1  
 X\_domain : 13C  
 X\_offset : 100 [ppm]  
 X\_freq : 125.761547 [MHz]  
 X\_low : 31.44584088 [MHz]  
 Solvent : CHLOROFORM-D  
 Spin\_get : 16 [Hz]  
 Temp\_get : 26.4 [°C]  
 Acq\_gain : 31  
 Filter\_width : 15.7206222 [MHz]  
 Filter\_mode : HETZSCHWIMMER

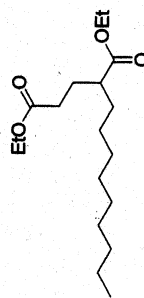

4a

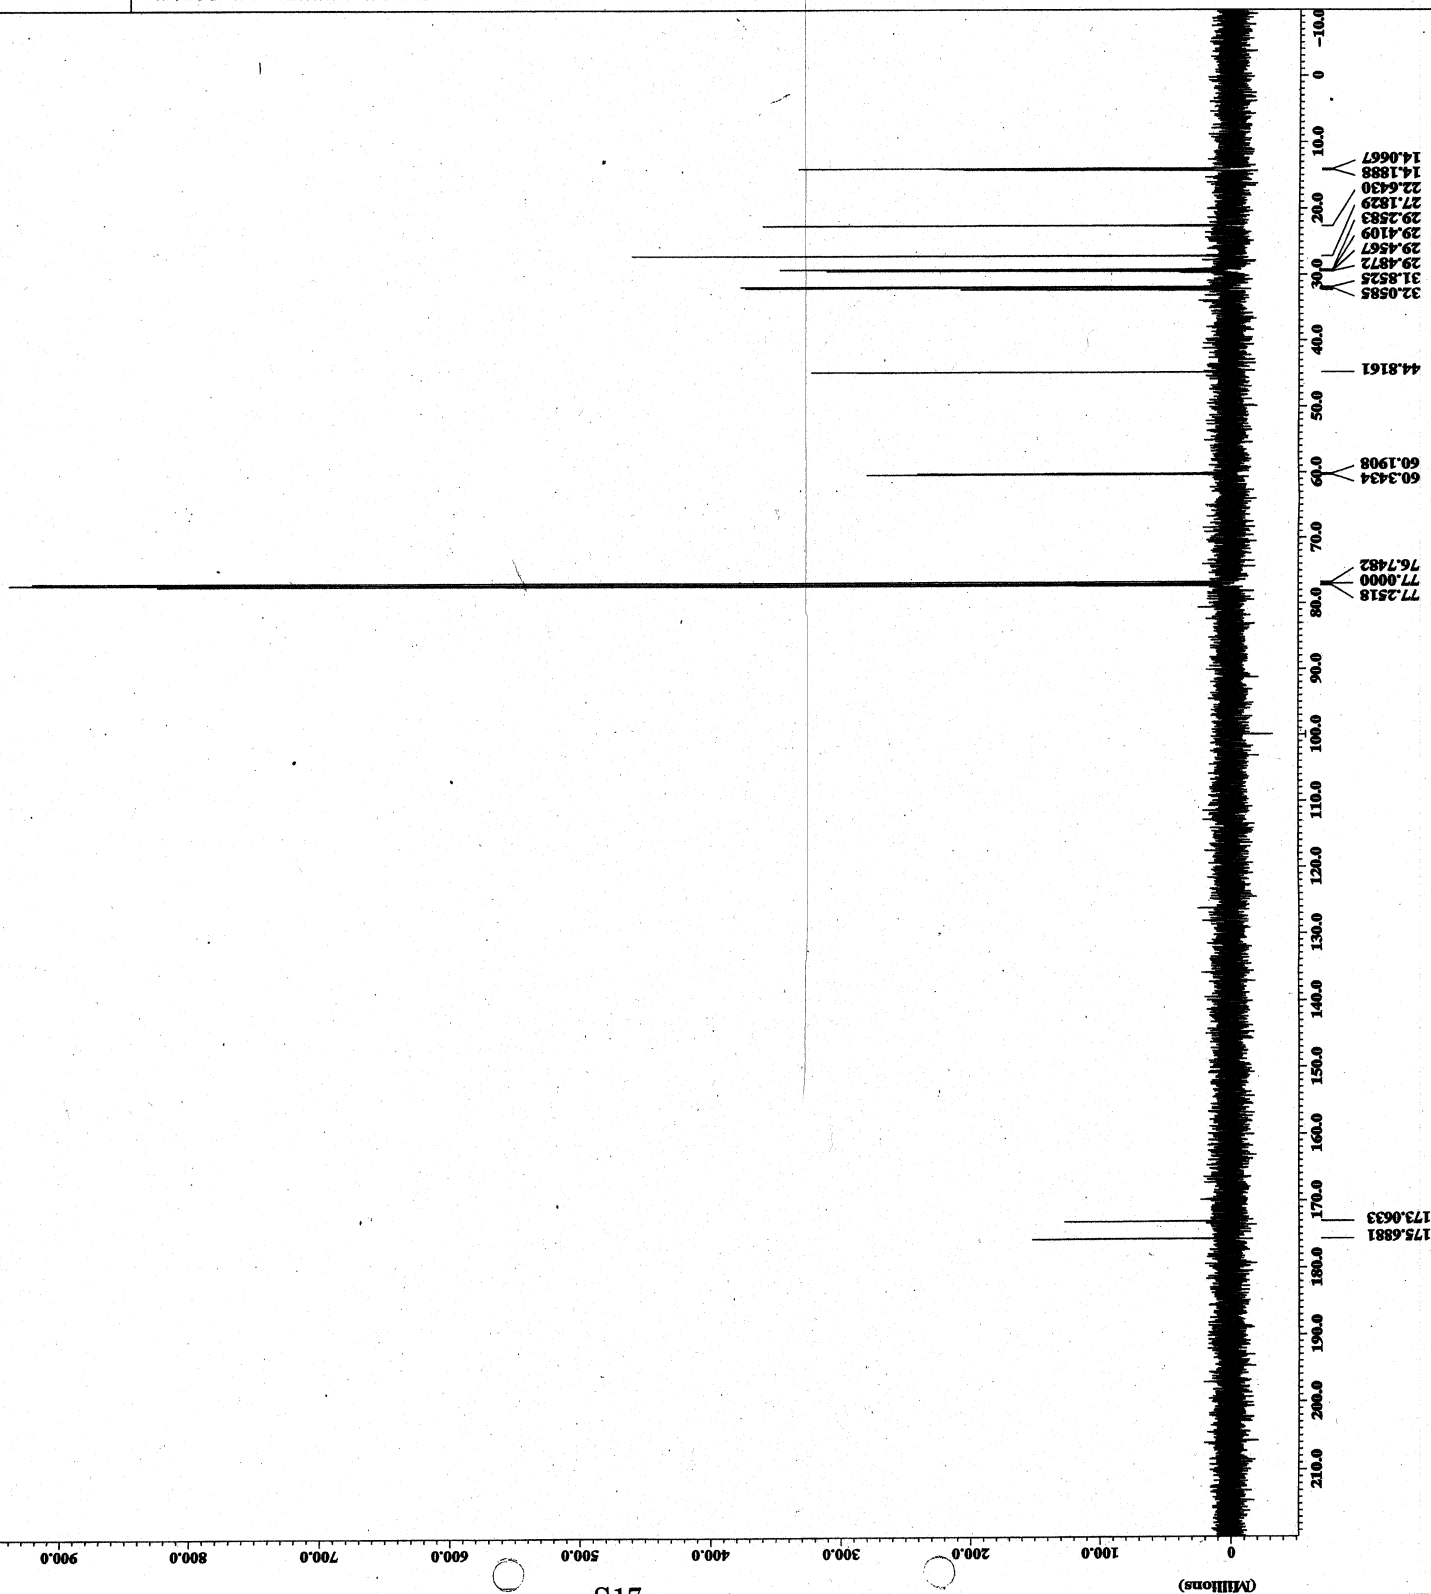

X : parts per Million : 13C

**ACQUISITION PARAMETERS**  
 File Name : 1d\_spectrum\_1152  
 Sample ID : 3b  
 Content : Single Pulse Experiment  
 Creation Date : 27-Apr-2007 15:08:18  
 Revision Date : 29-Apr-2007 07:29:13  
 Spec file : ECP500  
 Spec Type : DELTA\_90  
 Data Format : 1D COMPLEX  
 Dimensions : 2  
 Dim 1 : 1H  
 Dim 2 : 13C  
 Dim Units : [ppm]  
 Scans : 4  
 Mod : return  
 X\_domain : 1H  
 X\_center : 501.15041603 [MHz]  
 X\_freq : 7.50750751 [MHz]  
 Solvent : CDCl3/CDCl3-D  
 Spin : 16 [Hz]  
 Spin\_get : 15 [Hz]  
 Temp\_get : 11.74 [357.9] [K]  
 Field\_strength : 11.74 [357.9] [K]  
 Filter\_mode : HETCORH2H  
 Filter\_width : 3.75119936 [MHz]

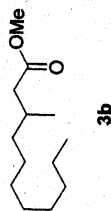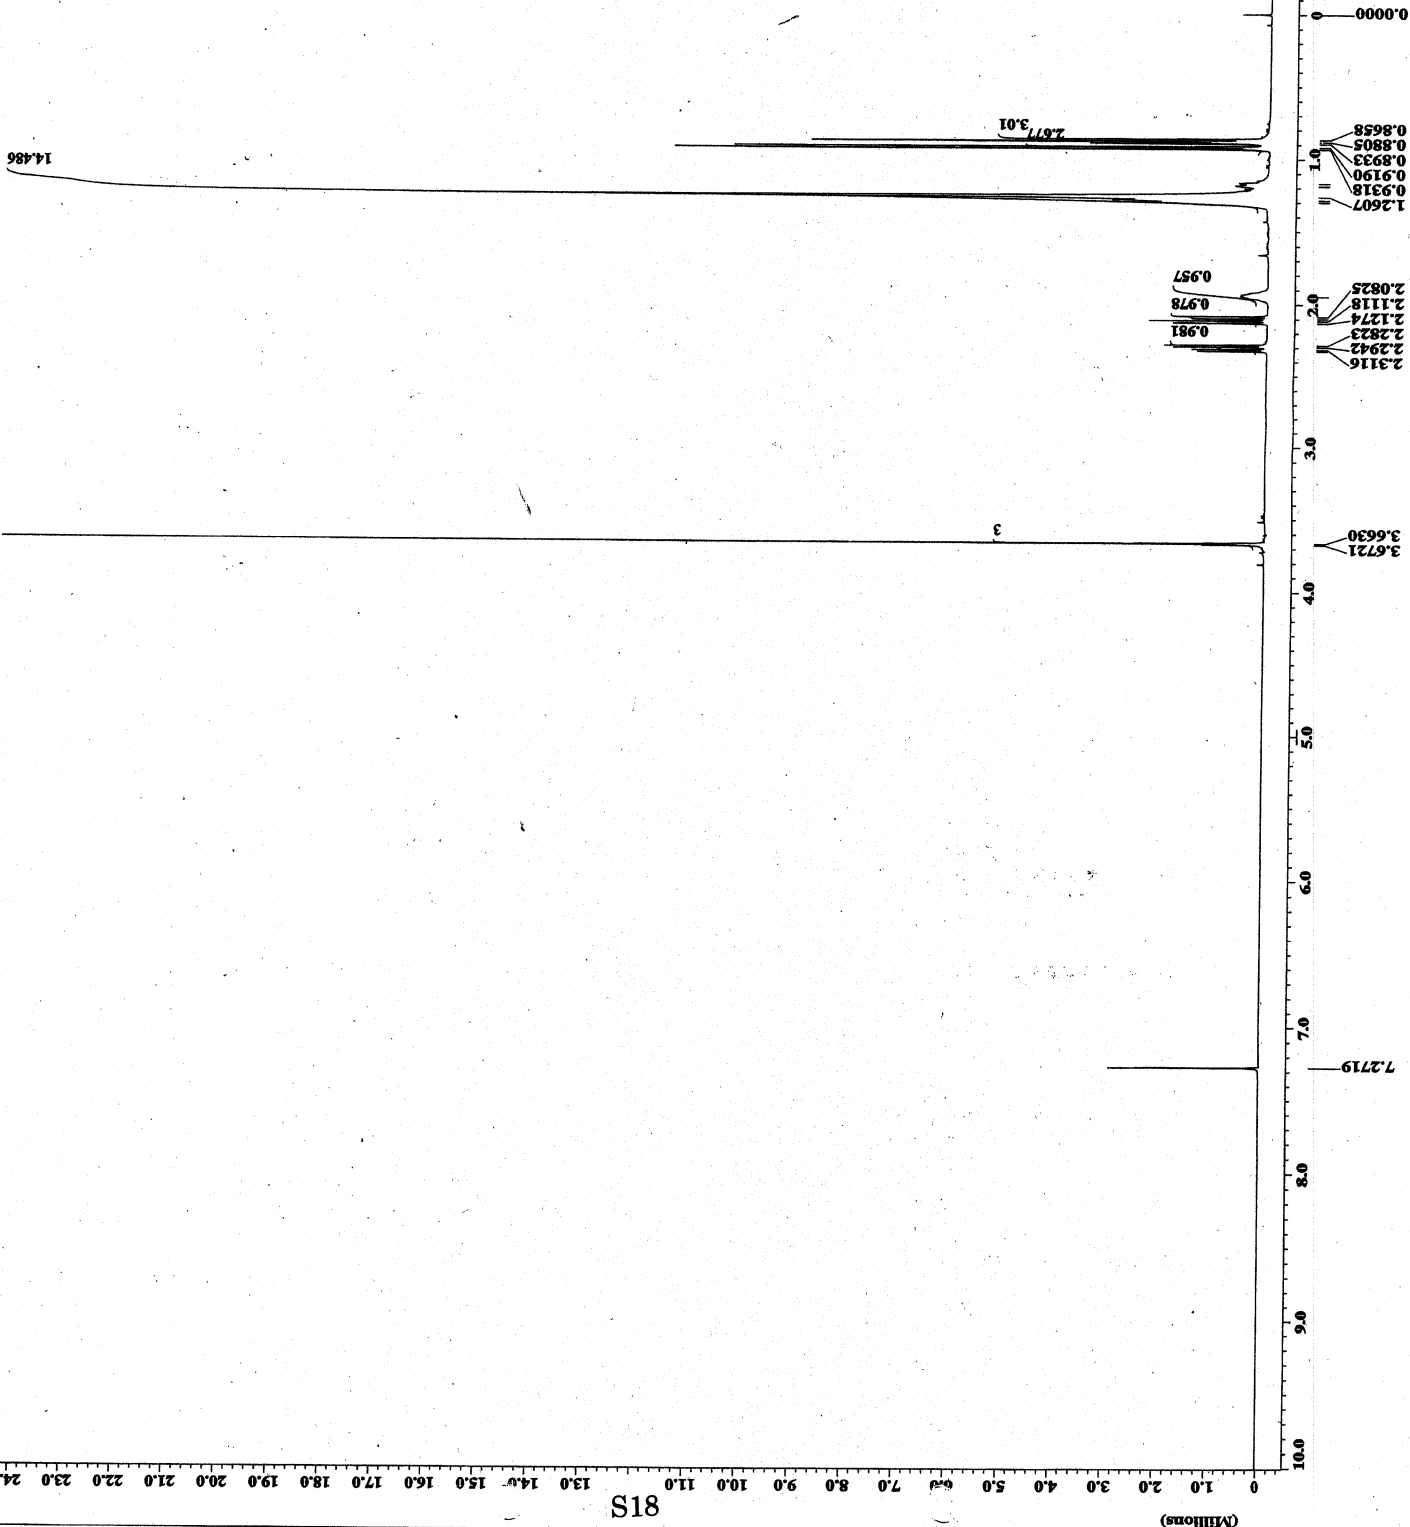

ACQUISITION PARAMETERS  
 File Name = 1d\_13c\_spectrum.279  
 Author =  
 Sample ID = 1d  
 Sample Name = 1d  
 Creation Date = 27-APR-2007 15:23:26  
 Revision Date = 29-APR-2007 07:44:12  
 Spec Site = ECP500  
 Spec Type = JEOL JNM  
 Data Format = 1D COMPAK  
 Dimensions = 1  
 Dim title = 13C  
 Dim size = 32768  
 Dim units = Deg  
 Dim 1 = 1  
 Mod return = 13C  
 X domain = 100 [ppm]  
 X offset = 121.77787547 [Hz]  
 X freq = 125.7604081 [MHz]  
 Solvent = CDCl3  
 Spin set = 14 [Hz]  
 Temp set = 26.2 [deg]  
 Acqz gain = 30  
 Field strength = 11.7473579 [T]  
 File Name = 1d\_13c\_spectrum.279  
 File size = 15.72066221 [MB]

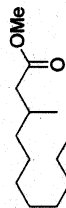

3b

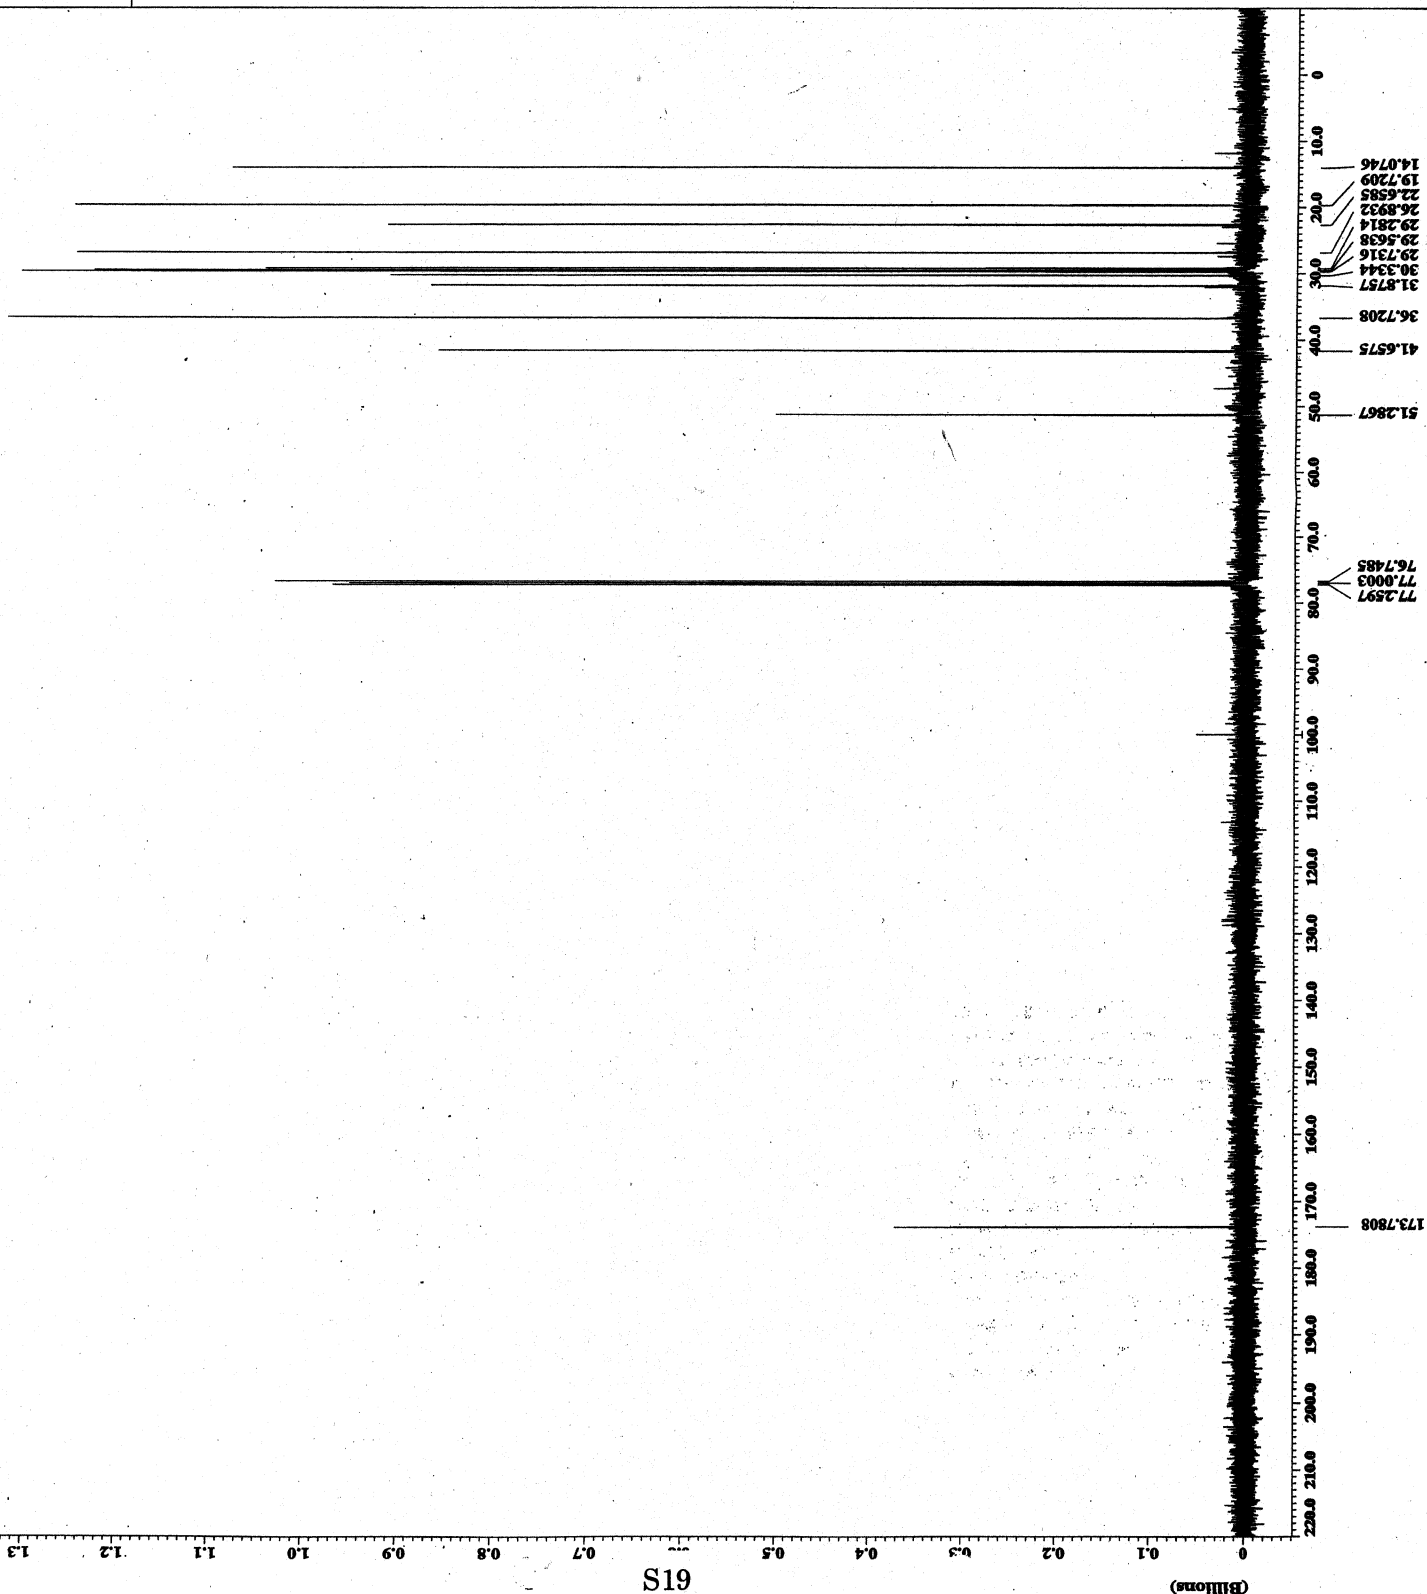

X : parts per Million : 13C

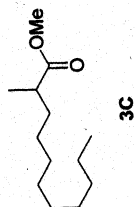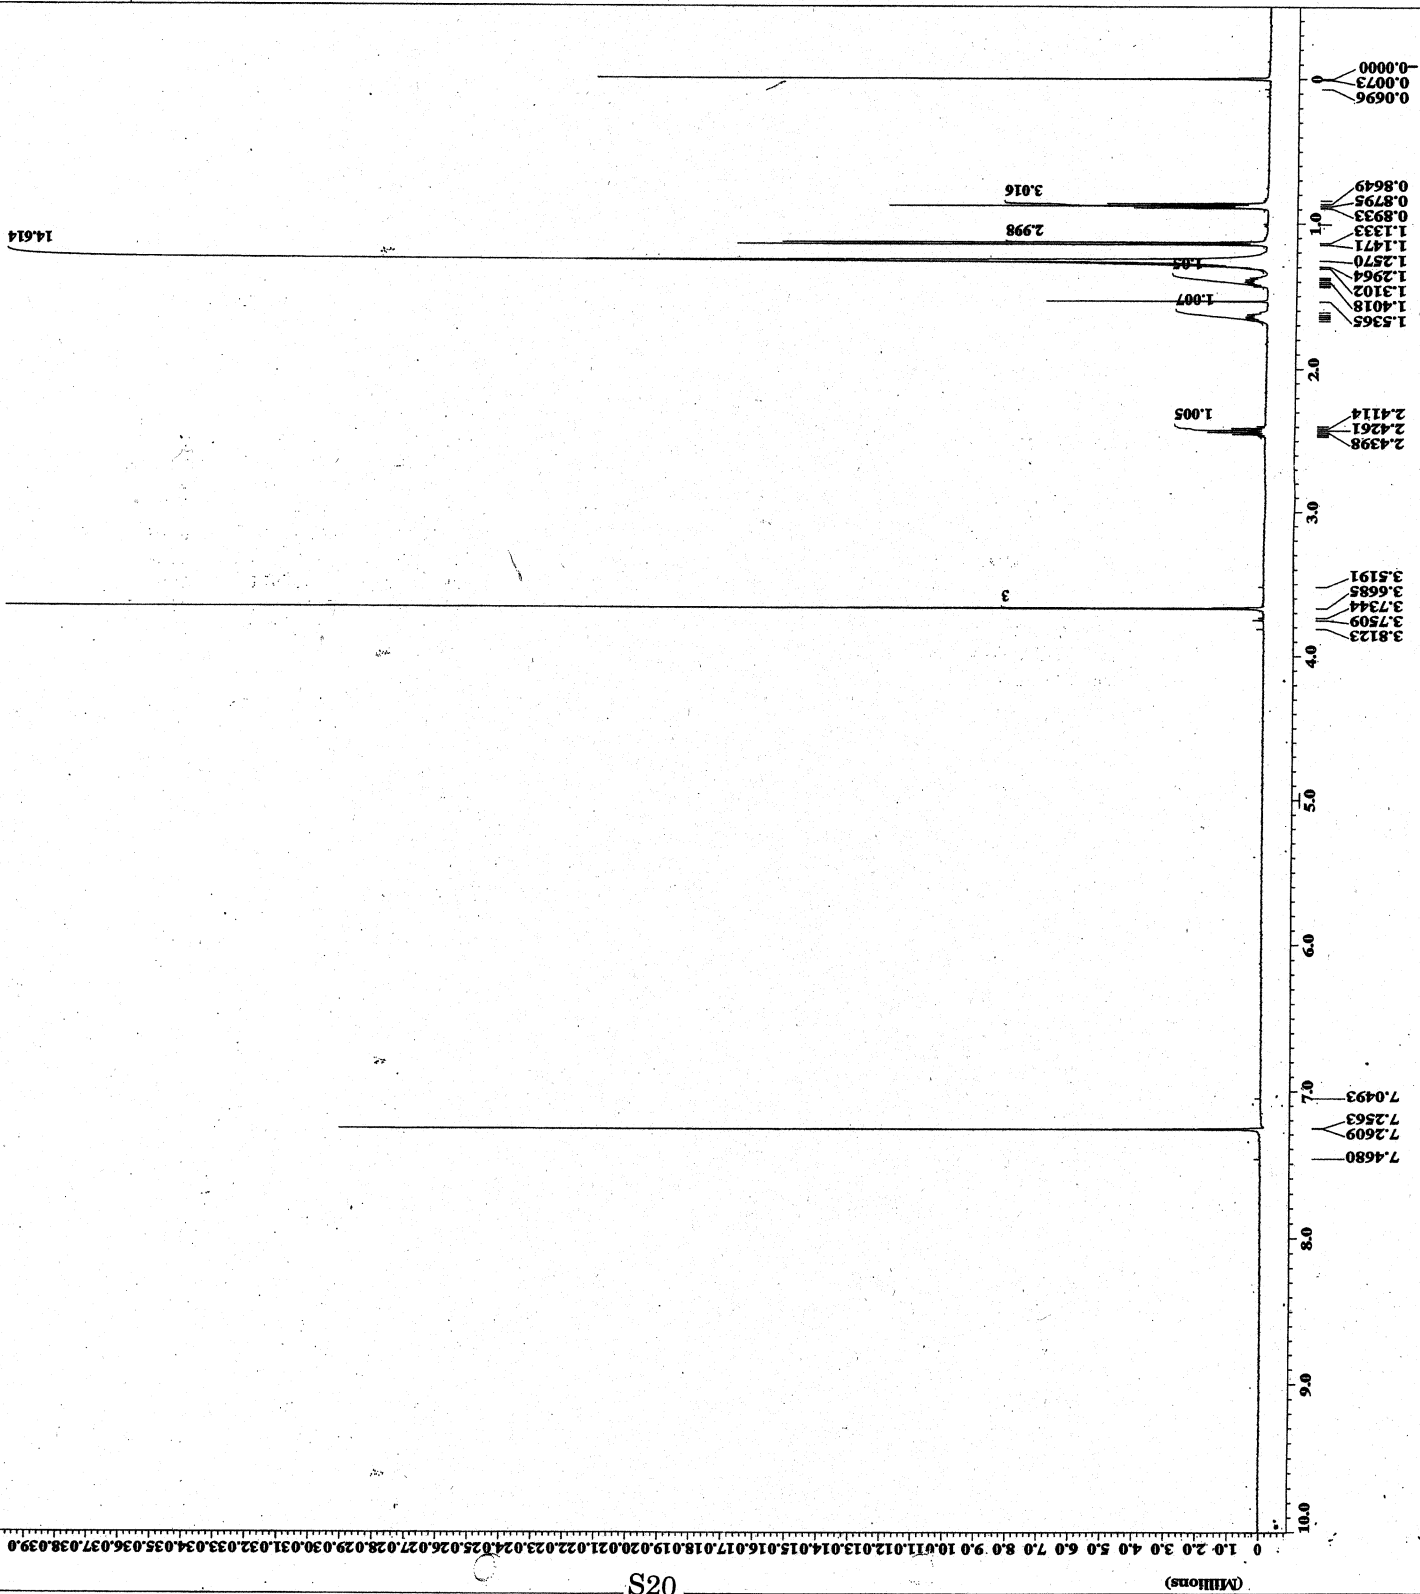

----- ACQUISITION PARAMETERS -----  
 File Name = 1d\_13c\_spectrum.283  
 Author =  
 Sample ID = 3c  
 Content = Single Pulse with Broad  
 Creation Date = 30-MAR-2007 17:32:09  
 Revision Date = 2-MAY-2007 08:54:56  
 Spec Site = MCP500  
 Spec Type = 1D COSY  
 Data Format = 1D COSY  
 Dimensions = 13C  
 Dim title = 13C  
 Dim size = 32768  
 Dim Units = [ppm]  
 Mod name = 13C  
 Mod format = 13C  
 X\_domain = 100 [ppm]  
 X\_offset = 125.77787547 [MHz]  
 X\_freq = 125.77787547 [MHz]  
 X\_resamp = 21.44554088 [MHz]  
 X\_resolution = 15 [Hz]  
 Spin set = 25.6 [Hz]  
 Temp\_set = 30  
 Nuc1z\_gain = 11.7473579 [V]  
 Field\_strength = 11.7473579 [V]  
 Filter\_width = 15.72066221 [Hz]

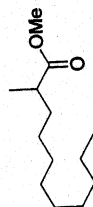

3C

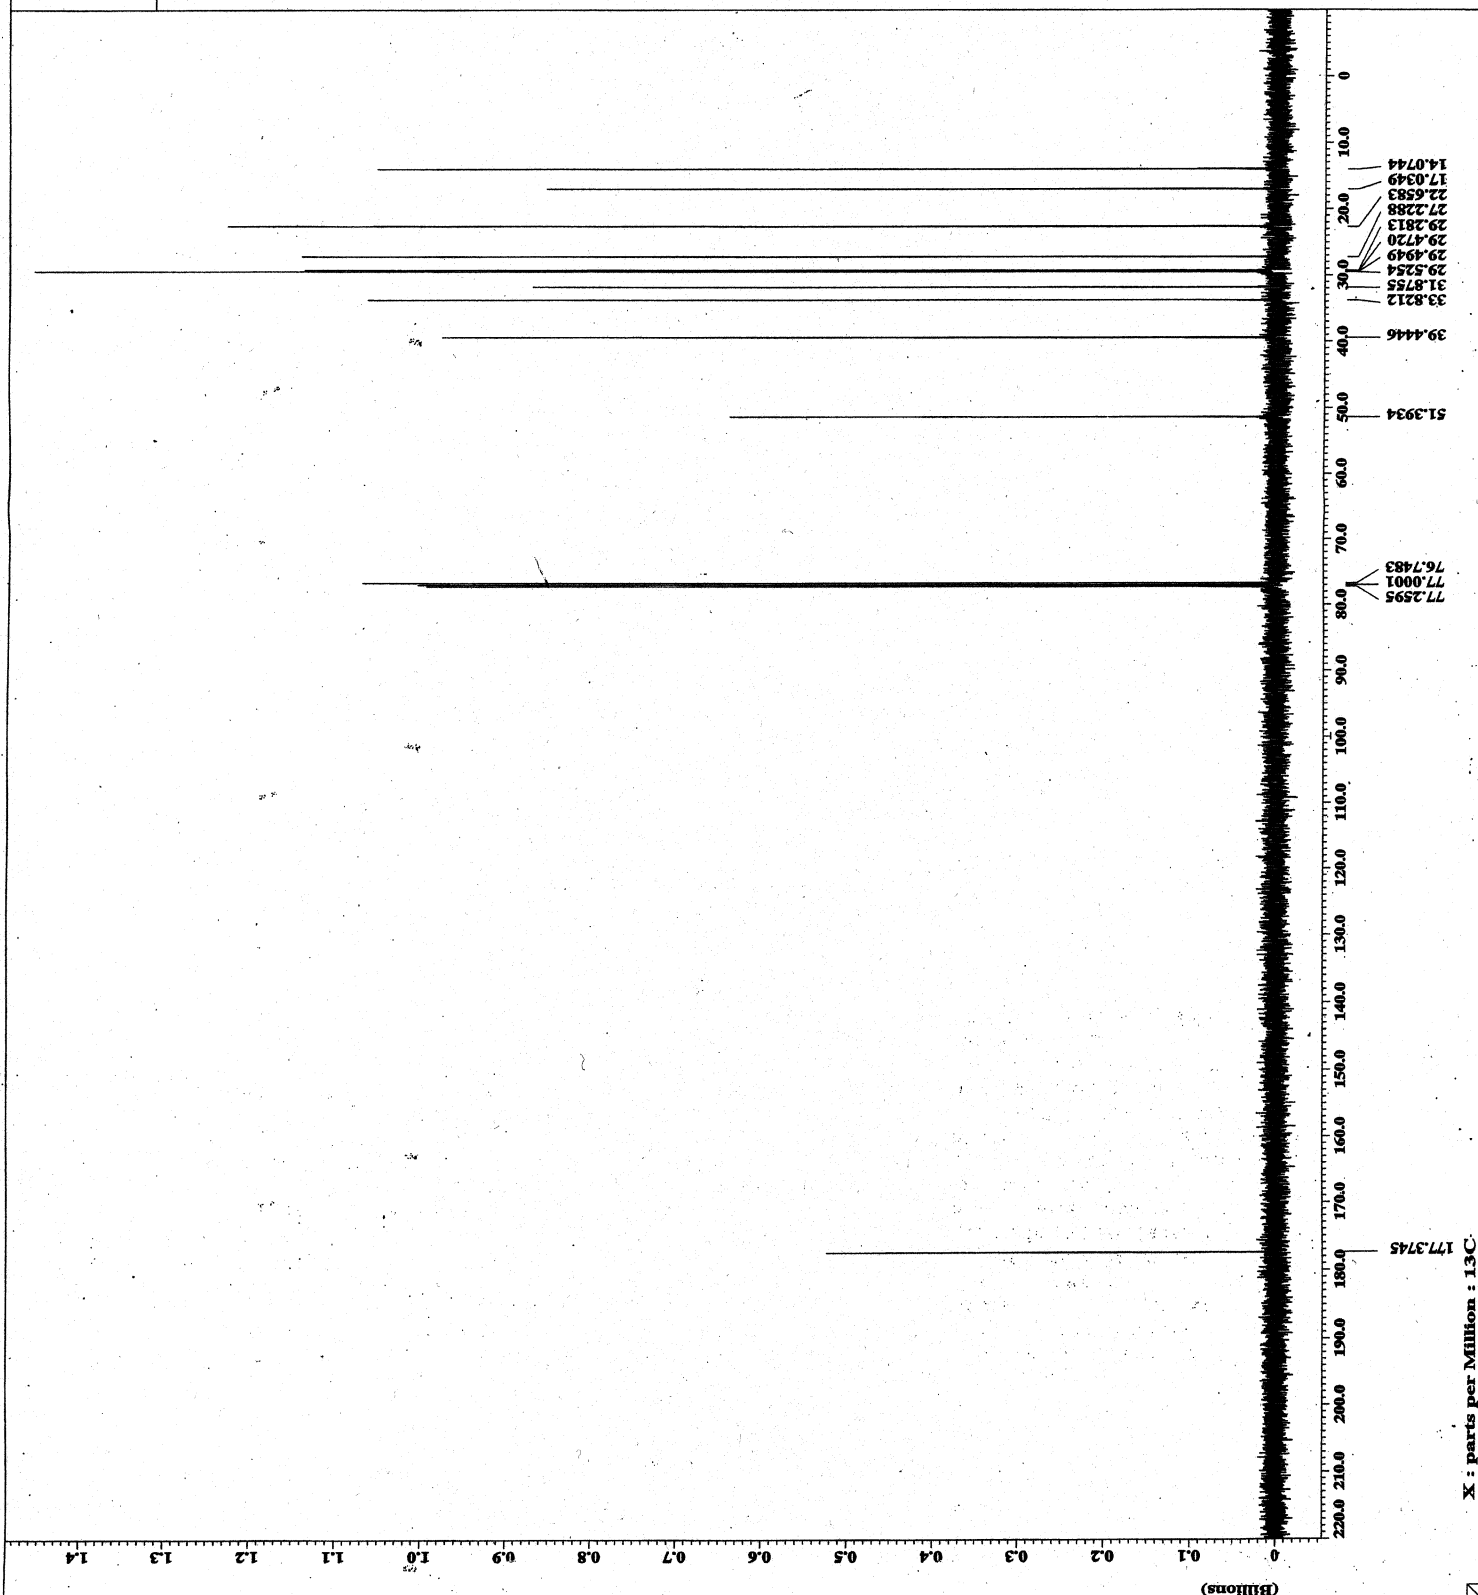

```

===== ACQUISITION PARAMETERS =====
File Name      = 14 spectrum 2882
Author         =
Sample ID      = MS-664 253-7
Instrument      = 17-800-2005 15.98134
Creation Date   = 17-SEP-2005 15:28:34
Revision Date   = 19-SEP-2005 01:15:11
Spec Site      = MS9000
Spec Type      = DECA_9000
Data Format     = 1D CWEXTR
MassRange      = X
Min title      = 1E
Min size       = 1594
Min offset     = 0
Min gain       = 0
Min smooth     = 1
Mod_return     = 1E
X_domain       = 5 [amu]
X_offset       = 7.001521600 [amu]
X_freq         = 0
Solvent        = CHLOROFORM-D
Solvent_pos    = 15 [Hz]
Solvent_get    = 23.2 [Hz]
Temp_set       = 23
Temp_get       = 23
Pulse_prog     = zgpg30p07
Pulse_length   = 9.999999999
Pulse_width    = 3.751199996 [Hz]
=====

```

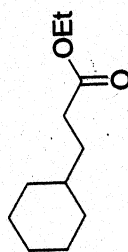

3d

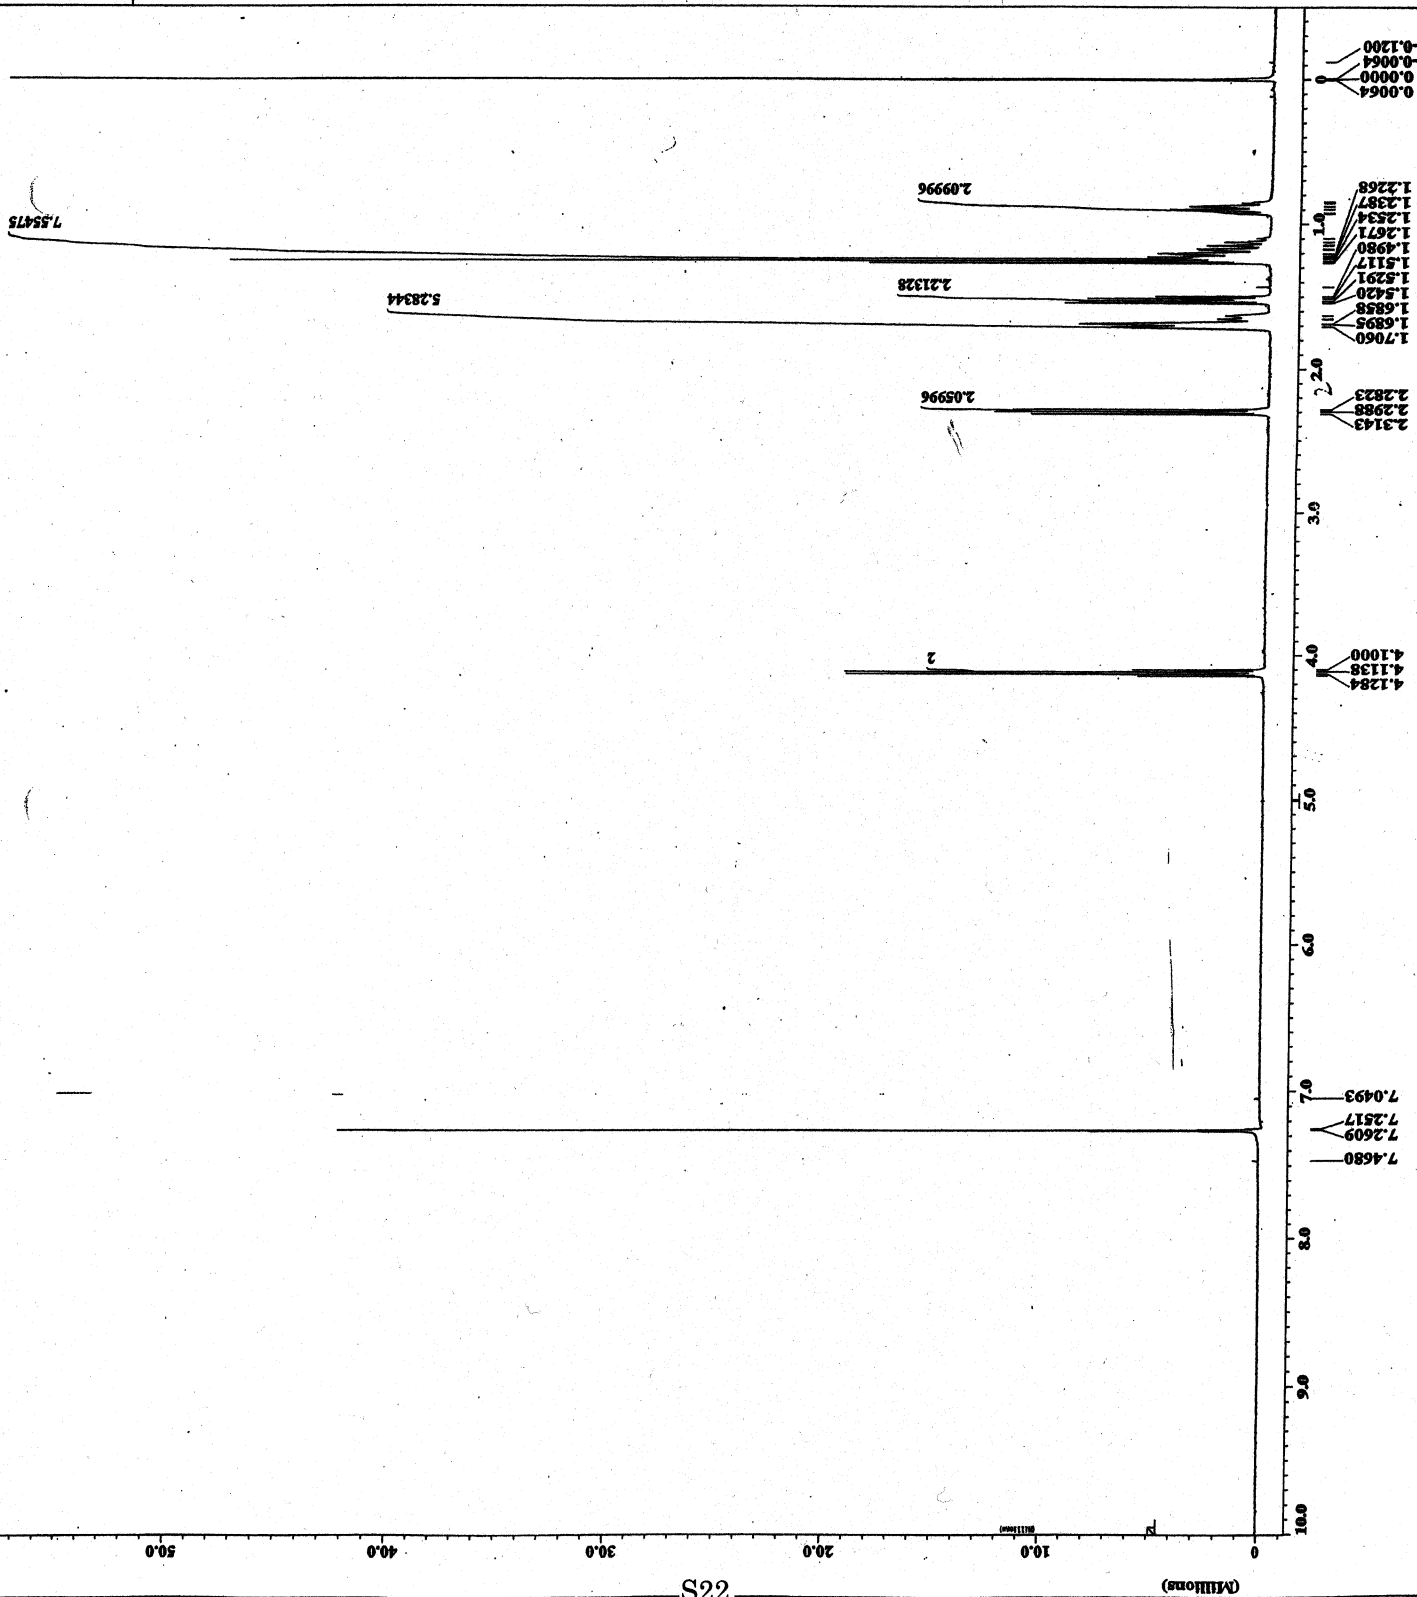

**X : parts per Million : 1H**

[illegible]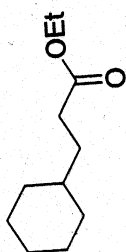

3d

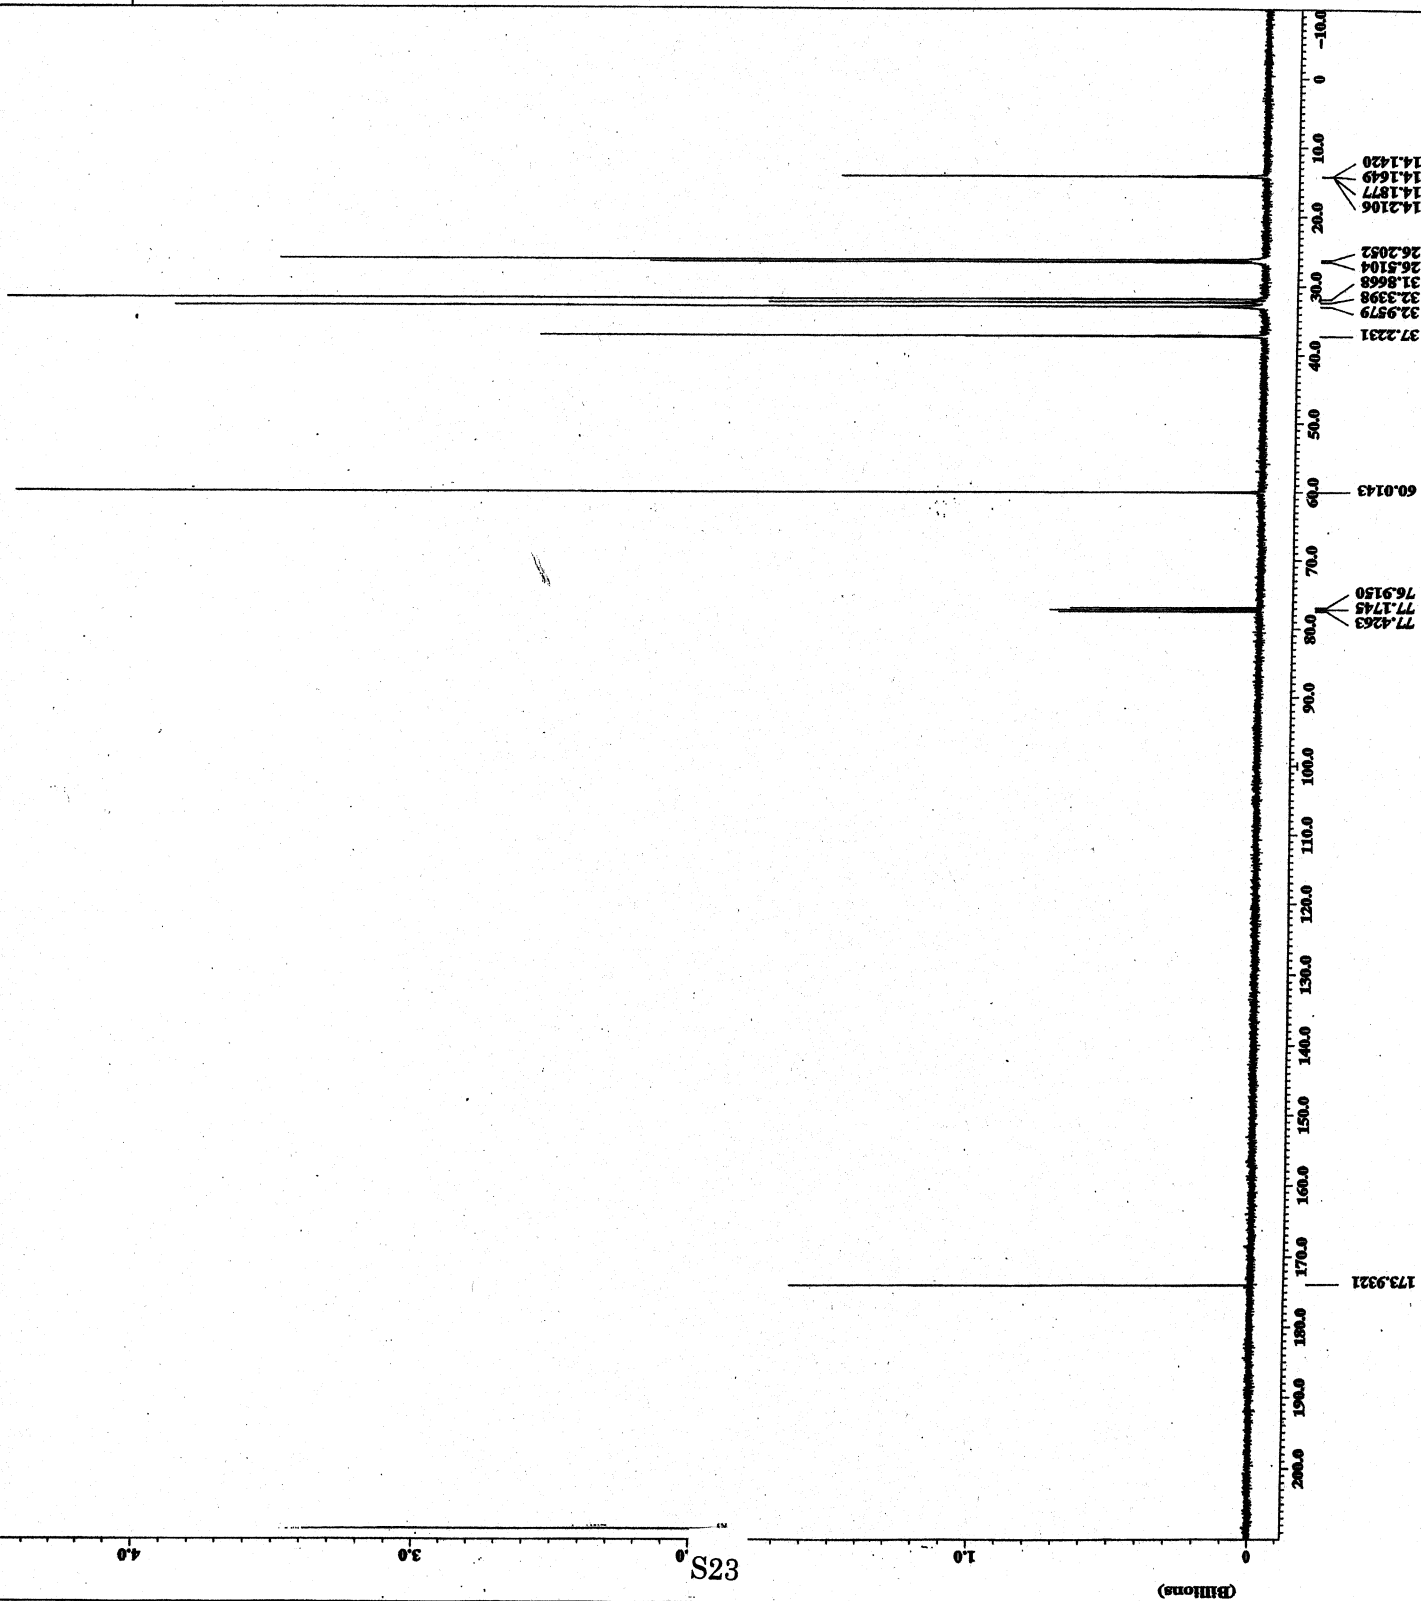

**X : parts per Million : 13C**

Acquisition Parameters  
 File Name: 14\_spectra.3501  
 Author: 207-046-216-31  
 Sample ID: Single Pulse Experiment  
 Creation Date: 5-MAR-2005 17:38:10  
 Revision Date: 6-MAR-2005 22:45:40  
 Spec Site: MZ500  
 Spec Type: 1D COSY  
 Data Path: 14  
 Dimensions: 14  
 Dia Size: 16384  
 Dia Units: [ppm]  
 Rows: 1  
 Columns: 1  
 X Offset: 5 [ppm]  
 X Freq: 500.13241602 [MHz]  
 X Name: 7-50750751 [MHz]  
 X Ref: 14 [ppm]  
 X Ref: 22.4 [ppm]  
 X Ref: 28  
 X Ref: 11.7473579 [Hz]  
 X Ref: 11.7473579 [Hz]  
 X Ref: 11.7473579 [Hz]  
 X Ref: 11.7473579 [Hz]

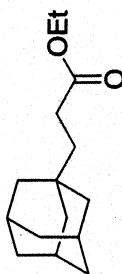

3e

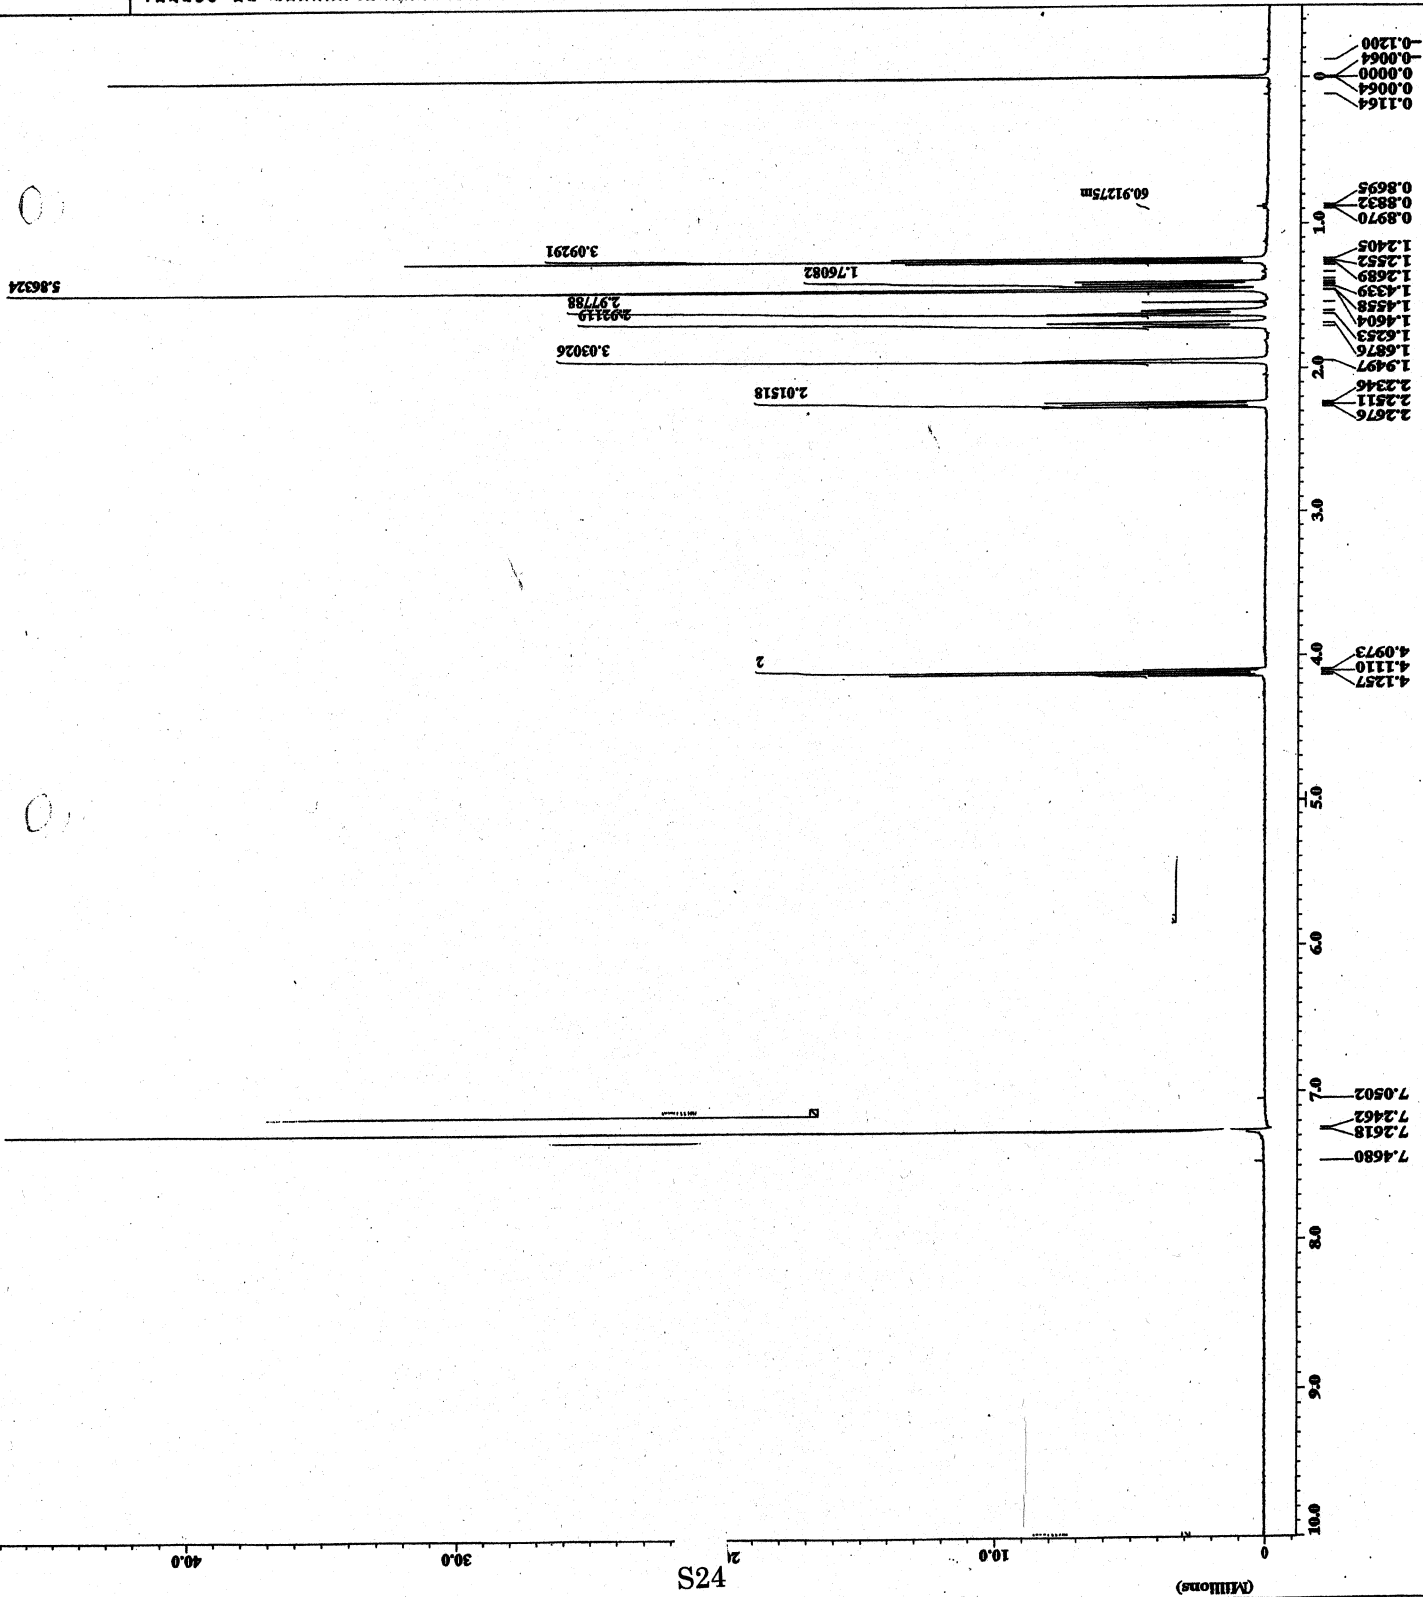



--- ACQUISITION PARAMETERS ---  
 File Name = 14\_15c\_spectrum.1665  
 Author =  
 Sample ID = R90-016-219-21  
 Chemical = Single Pulses with Broad  
 Creation Date = 1-08-2005 18:14:47  
 Revision Date = 2-JUN-2005 20:51:39  
 Spec Site = RCP500  
 Spec Type =  
 Data Format =  
 Dimensions =  
 Dim Title =  
 Dim Size =  
 Dim Units =  
 Mod Return =  
 X Domain =  
 X Offset =  
 X Freq =  
 X Temp =  
 Solvent =  
 Spin Set =  
 Temp Set =  
 Acq Gain =  
 F1 F2 =  
 F1 F2 Length =  
 F1 F2 Width =  
 F1 F2 Width =

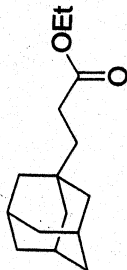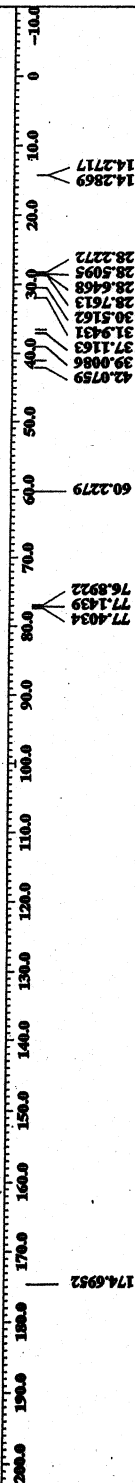

**ACQUISITION PARAMETERS**  
 File Name = 14\_spectra.ms  
 Author =  
 Sample ID = NBO-103-253-17  
 Acquisition Date = 17-08-2006 16:15:08  
 Revision Date = 18-08-2006 22:14:43  
 Spec Site = N2500  
 Spec Type = 1H  
 Data Format = 1D  
 Dimensions = 1D  
 Data Size = 16384  
 Data Units = [ppm]  
 Mod Name = 1  
 X Domain = 5 [ppm]  
 X Offset = 500.16241602 [Hz]  
 X Freq = 7.0707071 [Hz]  
 AcqTemp = 14 [Hz]  
 SpinSet = 23.31 [Hz]  
 TempSet = 29  
 AcqV Gain = 11.747379 [V]  
 Filter Attenuation = 10 [dB]  
 Filter Width = 3.75119396 [Hz]

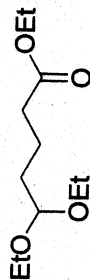

3f

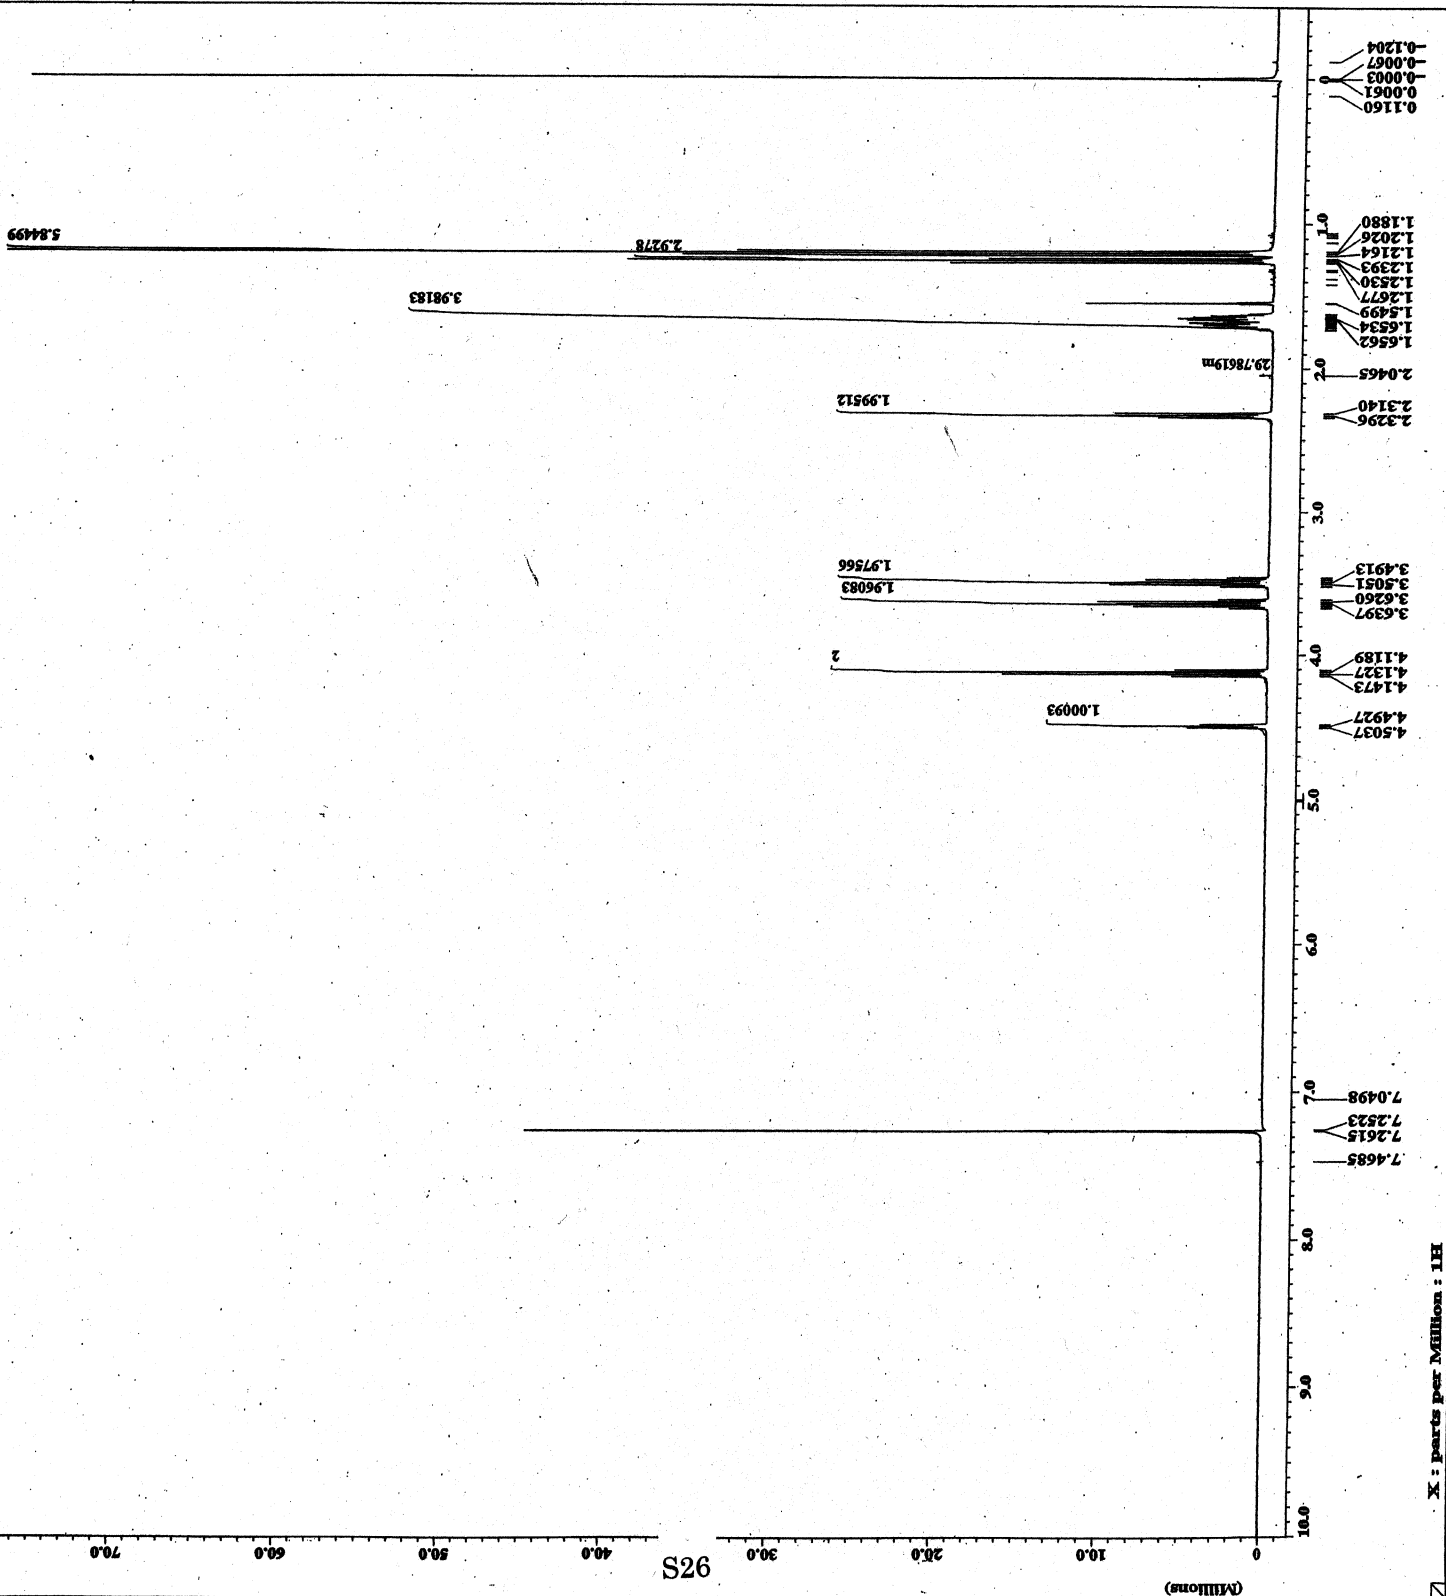

Acquisition Parameters  
 File Name: 14\_13c\_spectrums.1303  
 Author: NMR-102-429-37  
 Sample ID: Single Pulse with Recoupling  
 Content: 13-PM-2006 210113  
 Creation Date: 21-PM-2006 04:29:58  
 Revision Date: NMR500  
 Spec Site: NMR500  
 Spec Type: NMR500  
 Data Format: 1D Contour  
 Dimensions: 13C  
 Bin Size: 32768  
 Bin Units: [ppm]  
 Range: 400  
 X\_Axis: 13C  
 X\_Offset: 100 [ppm]  
 X\_Freq: 125.77787547 [MHz]  
 X\_Acqp: 31.44654088 [MHz]  
 Solvent: CDCl3  
 Temp: 30  
 Temp\_Set: 23.3 [deg]  
 Acq\_Pulse: 30  
 Acq\_Pulse\_Prog: 30  
 Field Strength: 11.7473579 [T]  
 Filter: MZM  
 Filter\_Prog: MZM  
 Filter\_Freq: 15.72066221 [MHz]

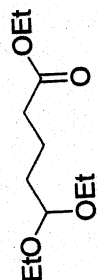

3f

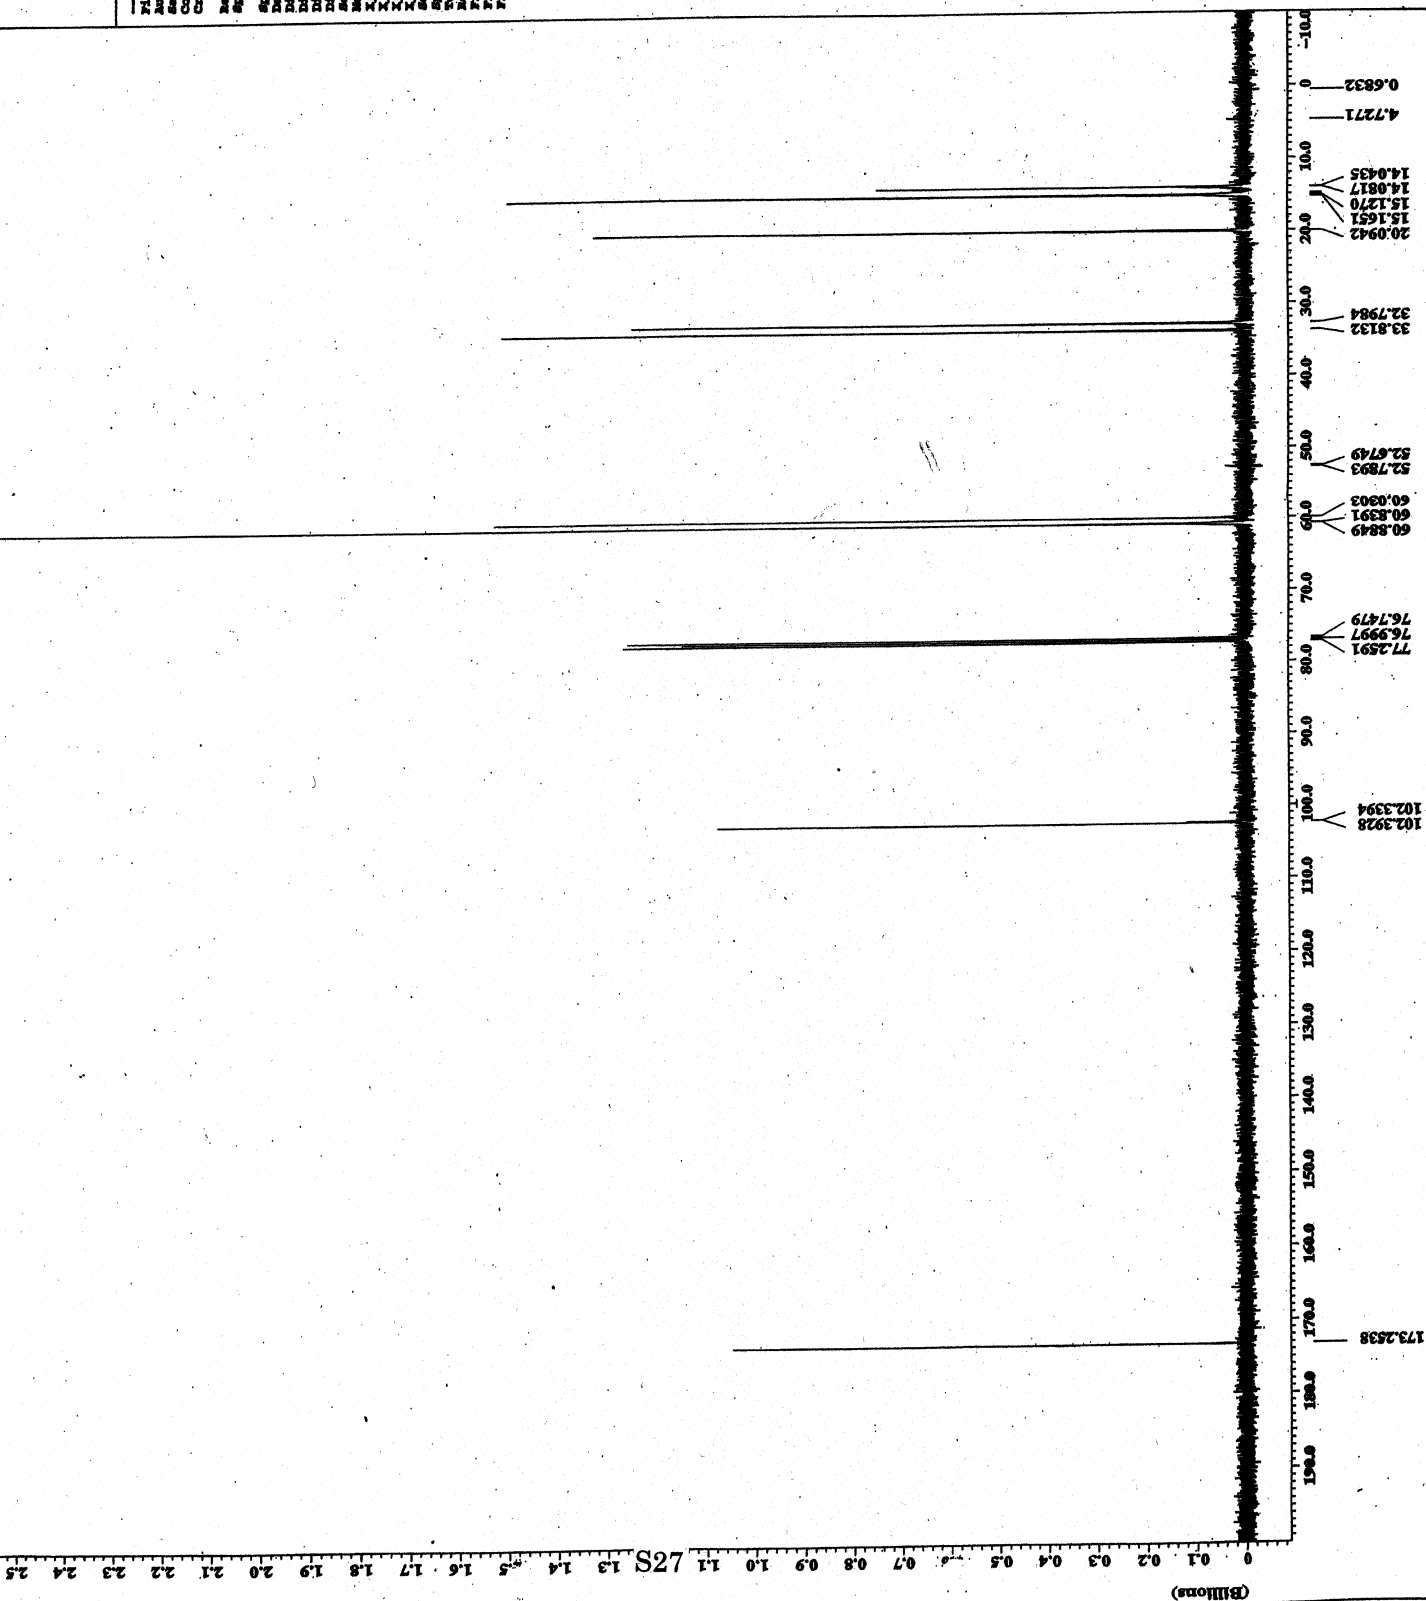

----- ACQUISITION PARAMETERS -----  
File Name = id\_spectrum.634  
Author =  
Sample ID = NPO-162-NYAC-2methyl  
Concentration = 100 mg/ml  
Creation Date = 3-OCT-2006 21:26:40  
Revision Date = 5-OCT-2006 08:59:31  
Spec Site = ECP500  
Spec Type = 1H  
Data Format = 1D COMPAK  
Dimensions = 1H  
Dim Title = 1H  
Dim Size = 65536  
Dim Units = [ppm]  
Scan = 1  
Mod\_return = 1H  
X\_domain = 5 [ppm]  
X\_offset = 790.15241602 [Hz]  
X\_freq = 790.15241602 [Hz]  
Solvent = CHLOROFORM-D  
Spin\_set = 19 [Hz]  
Temp\_set = 25.9 [C]  
Temp\_get =  
Pulse\_prog = zgpg30  
Pulse\_length = 15.747379 [s]  
Filter\_mode = MZG30  
Filter\_width = 3.75119936 [Hz]

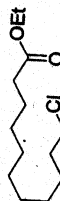

3g

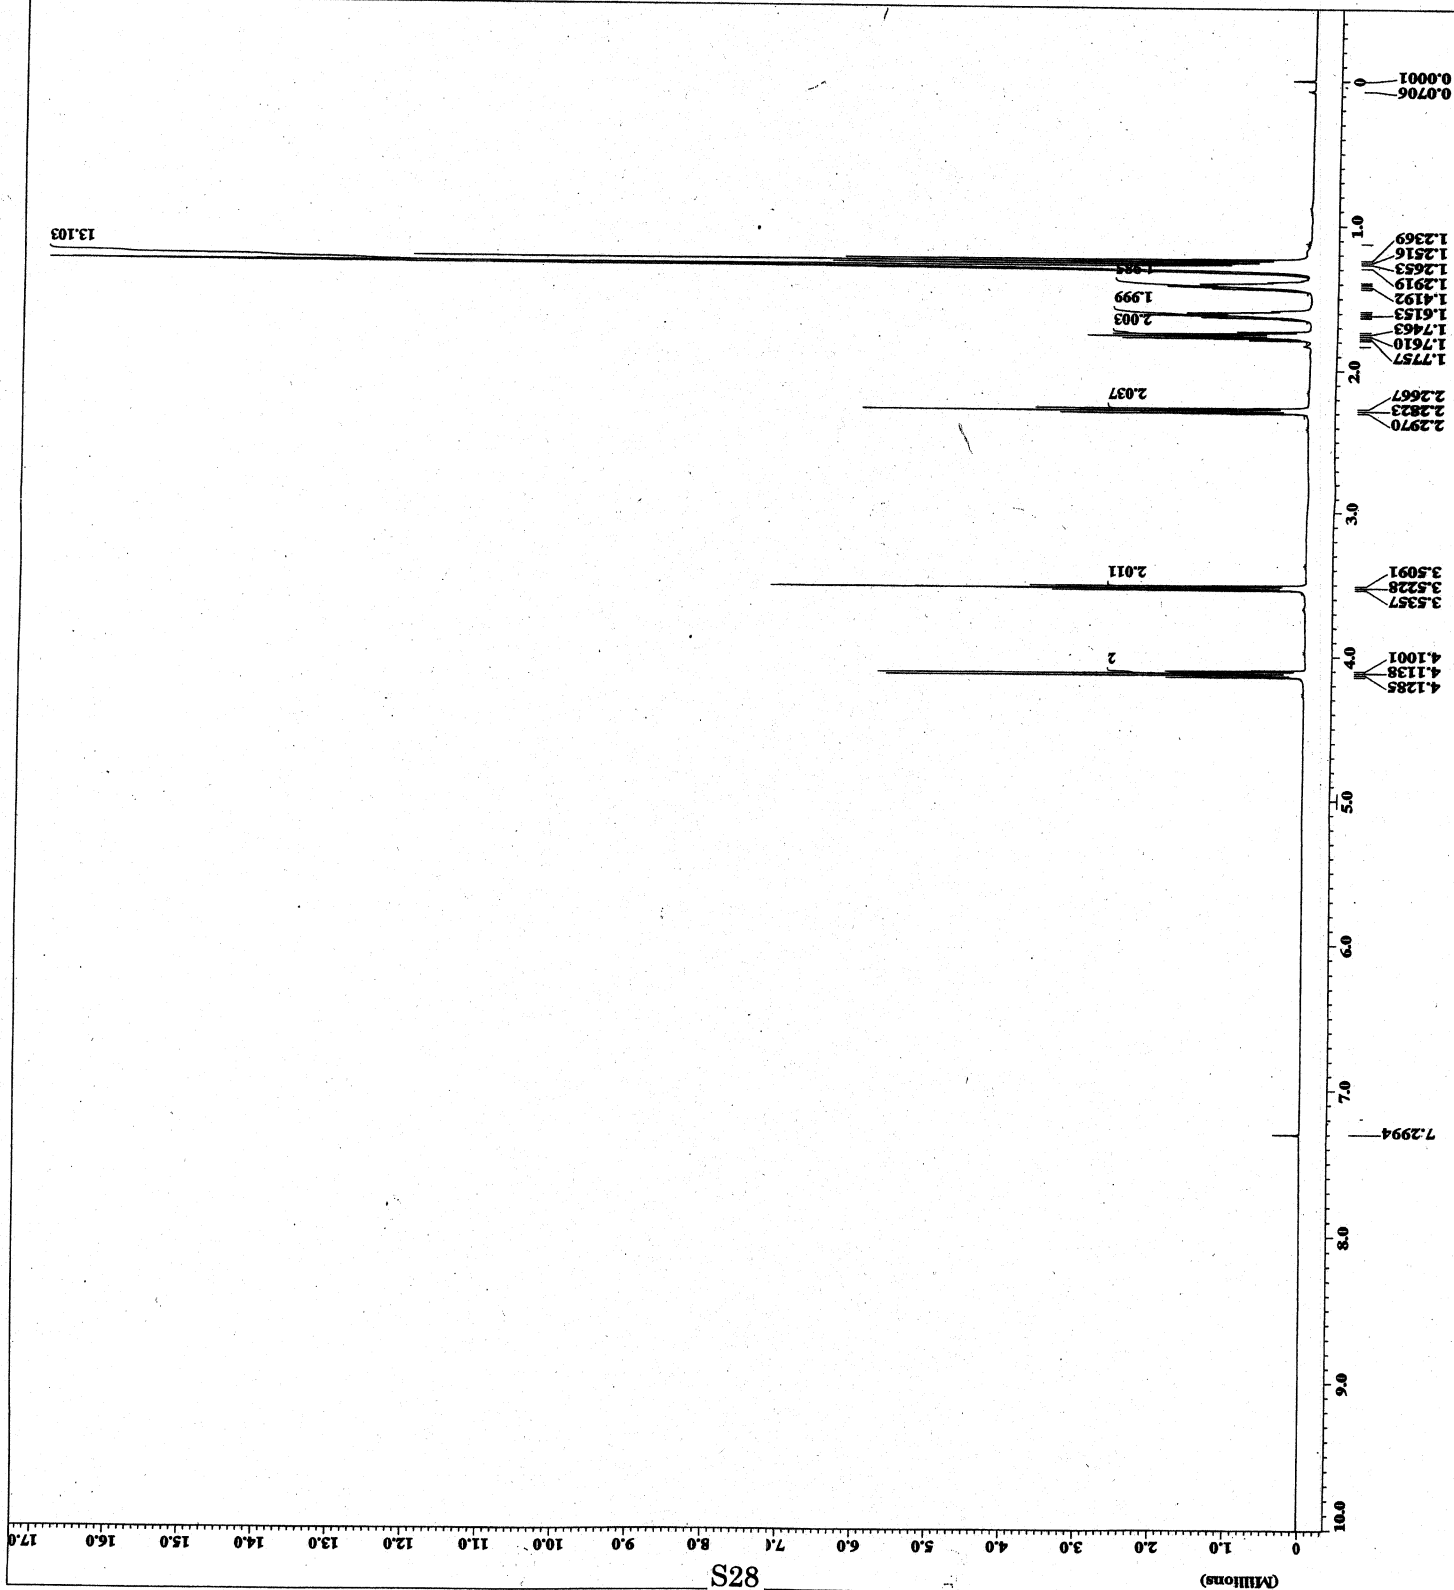

----- ACQUISITION PARAMETERS -----  
 File Name = 1d\_13c\_spectrum.190  
 Author =  
 Sample ID = BPT-162-277C-2meyer  
 Sample = Single Pulse with Broad  
 Creation Date = 5-Oct-2006 21:39:36  
 Revision Date = 5-Oct-2006 09:15:02  
 Spec Site = RCP500  
 Spec Type = 1D 13C  
 Data Format = 1D COMPLEX  
 Dimensions = 13C  
 Dim Title = 13C  
 Dim Size = 32768  
 Dim Units = [ppm]  
 Mod Return = 1  
 X\_domain = 13C  
 X\_offset = 100 [ppm]  
 X\_freq = 125.77787547 [MHz]  
 X\_name = 13C  
 X\_pulse = 11.4454088 [GHz]  
 Spin\_pul = 14 [Hz]  
 Temp\_get = 25.8 [deg]  
 Nuc1\_get = 30  
 Field\_strength = 11.7473579 [T]  
 File\_name = 1d\_13c\_spectrum.190  
 Filesize\_width = 15.77066221 [Hz]

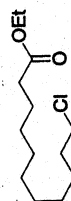

3g

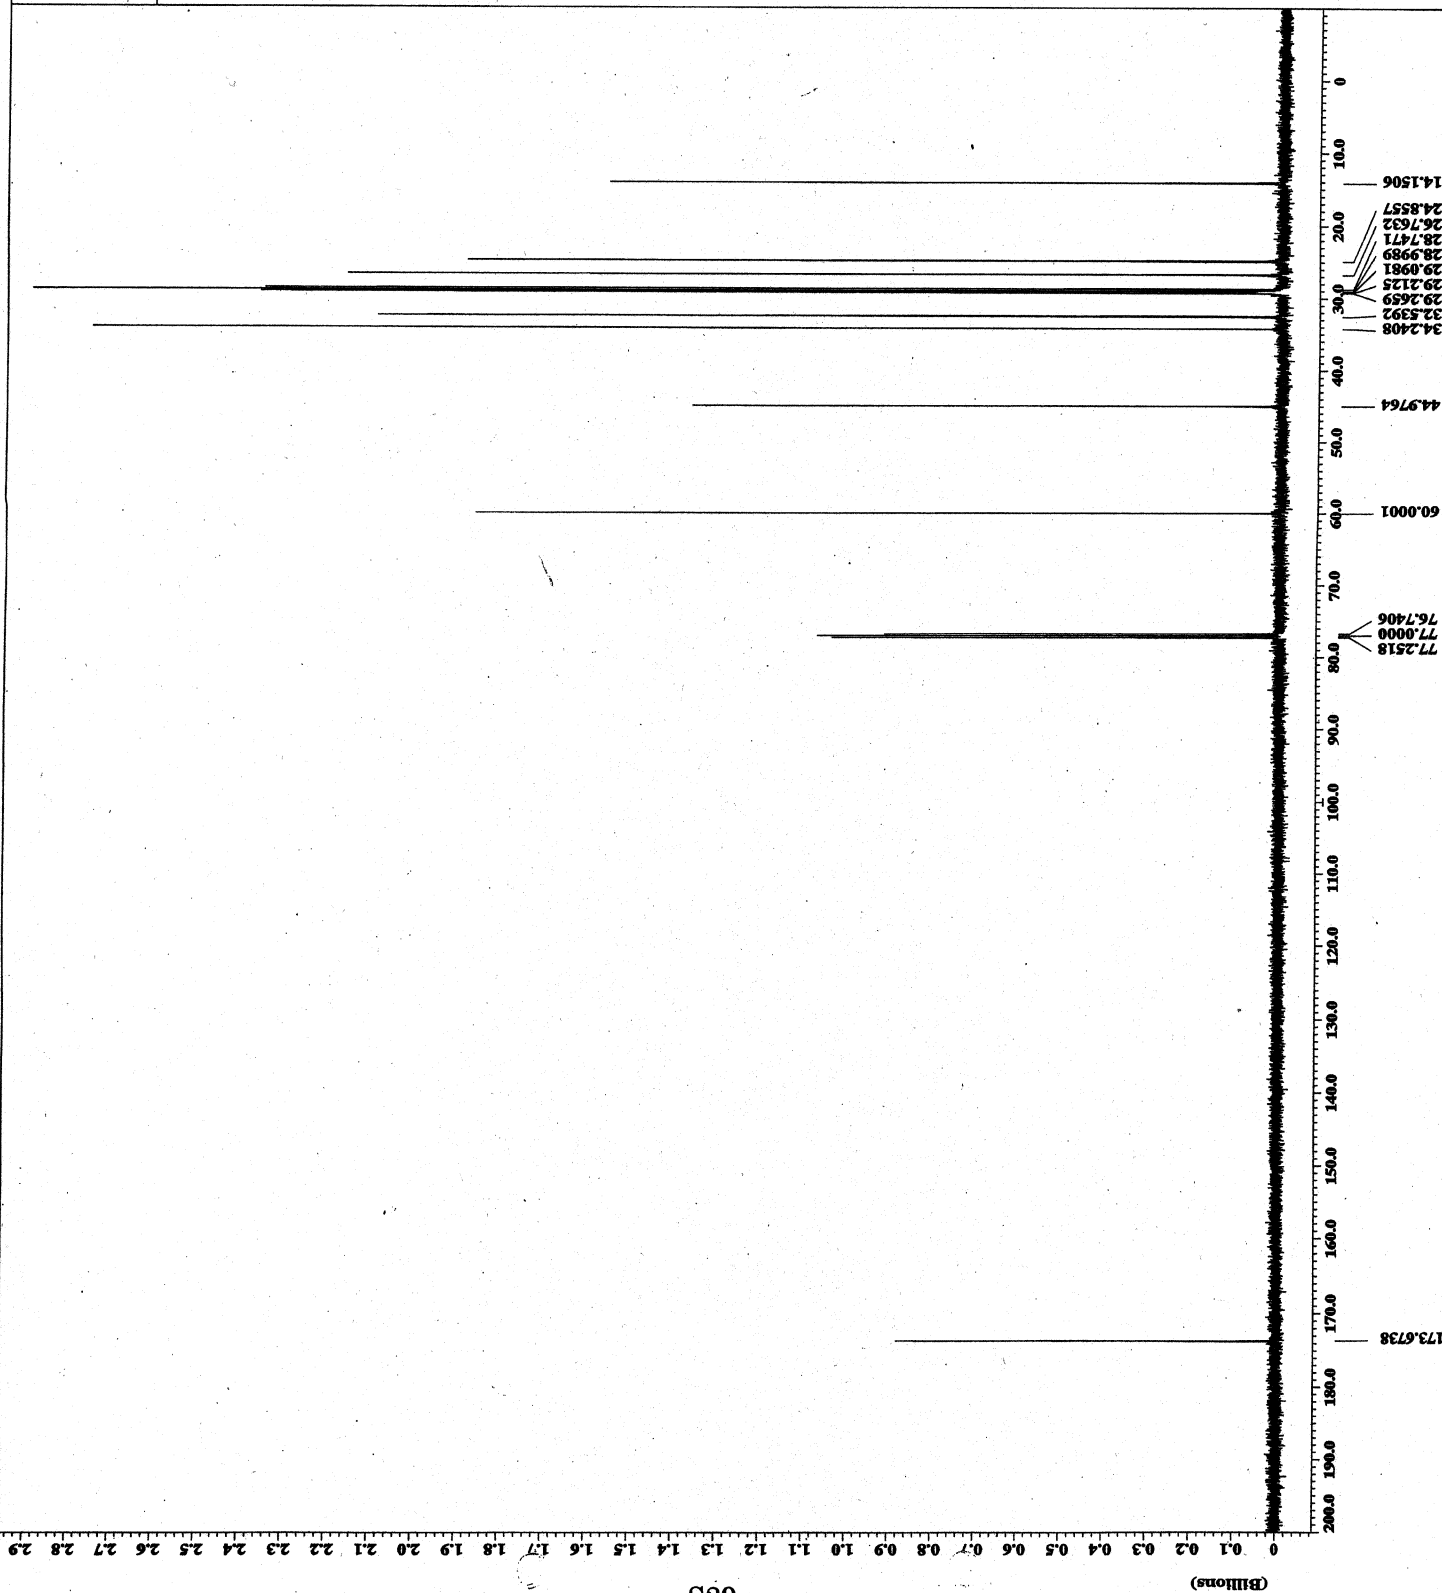

X : parts per Million : 13C

ACQUISITION PARAMETERS  
File Name = 1d\_spectrum.44  
Date = 2006-06-05 06:27:14  
Sample ID = 1d\_spectrum.44  
Constant = 3.0000000000000000  
Creation Date = 3-JUN-2006 21:03:49  
Revision Date = 5-JUN-2006 06:27:14  
Spec file = MCF500  
Spec Type = DELTA\_MMR  
Data Format = ID COMPLEX  
Dimensions = 1  
Dim 1 Size = 1024  
Dim 2 Size = 1024  
Dim 3 Size = 1024  
Dim 4 Size = 1024  
Dim 5 Size = 1024  
Mod Return = 1  
X Domain = 1  
X Offset = 0  
X Scale = 1  
X Sweep = 1  
Solvent = CHLOROFORM-D  
Spin Set = 15 [Hz]  
Temp Set = 24 [C]  
Field Strength = 11.7471579 [T]  
Filter Mode = MUYRANWATZ  
Filter Width = 3.7511936 [Hz]

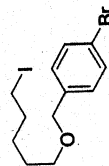

1h

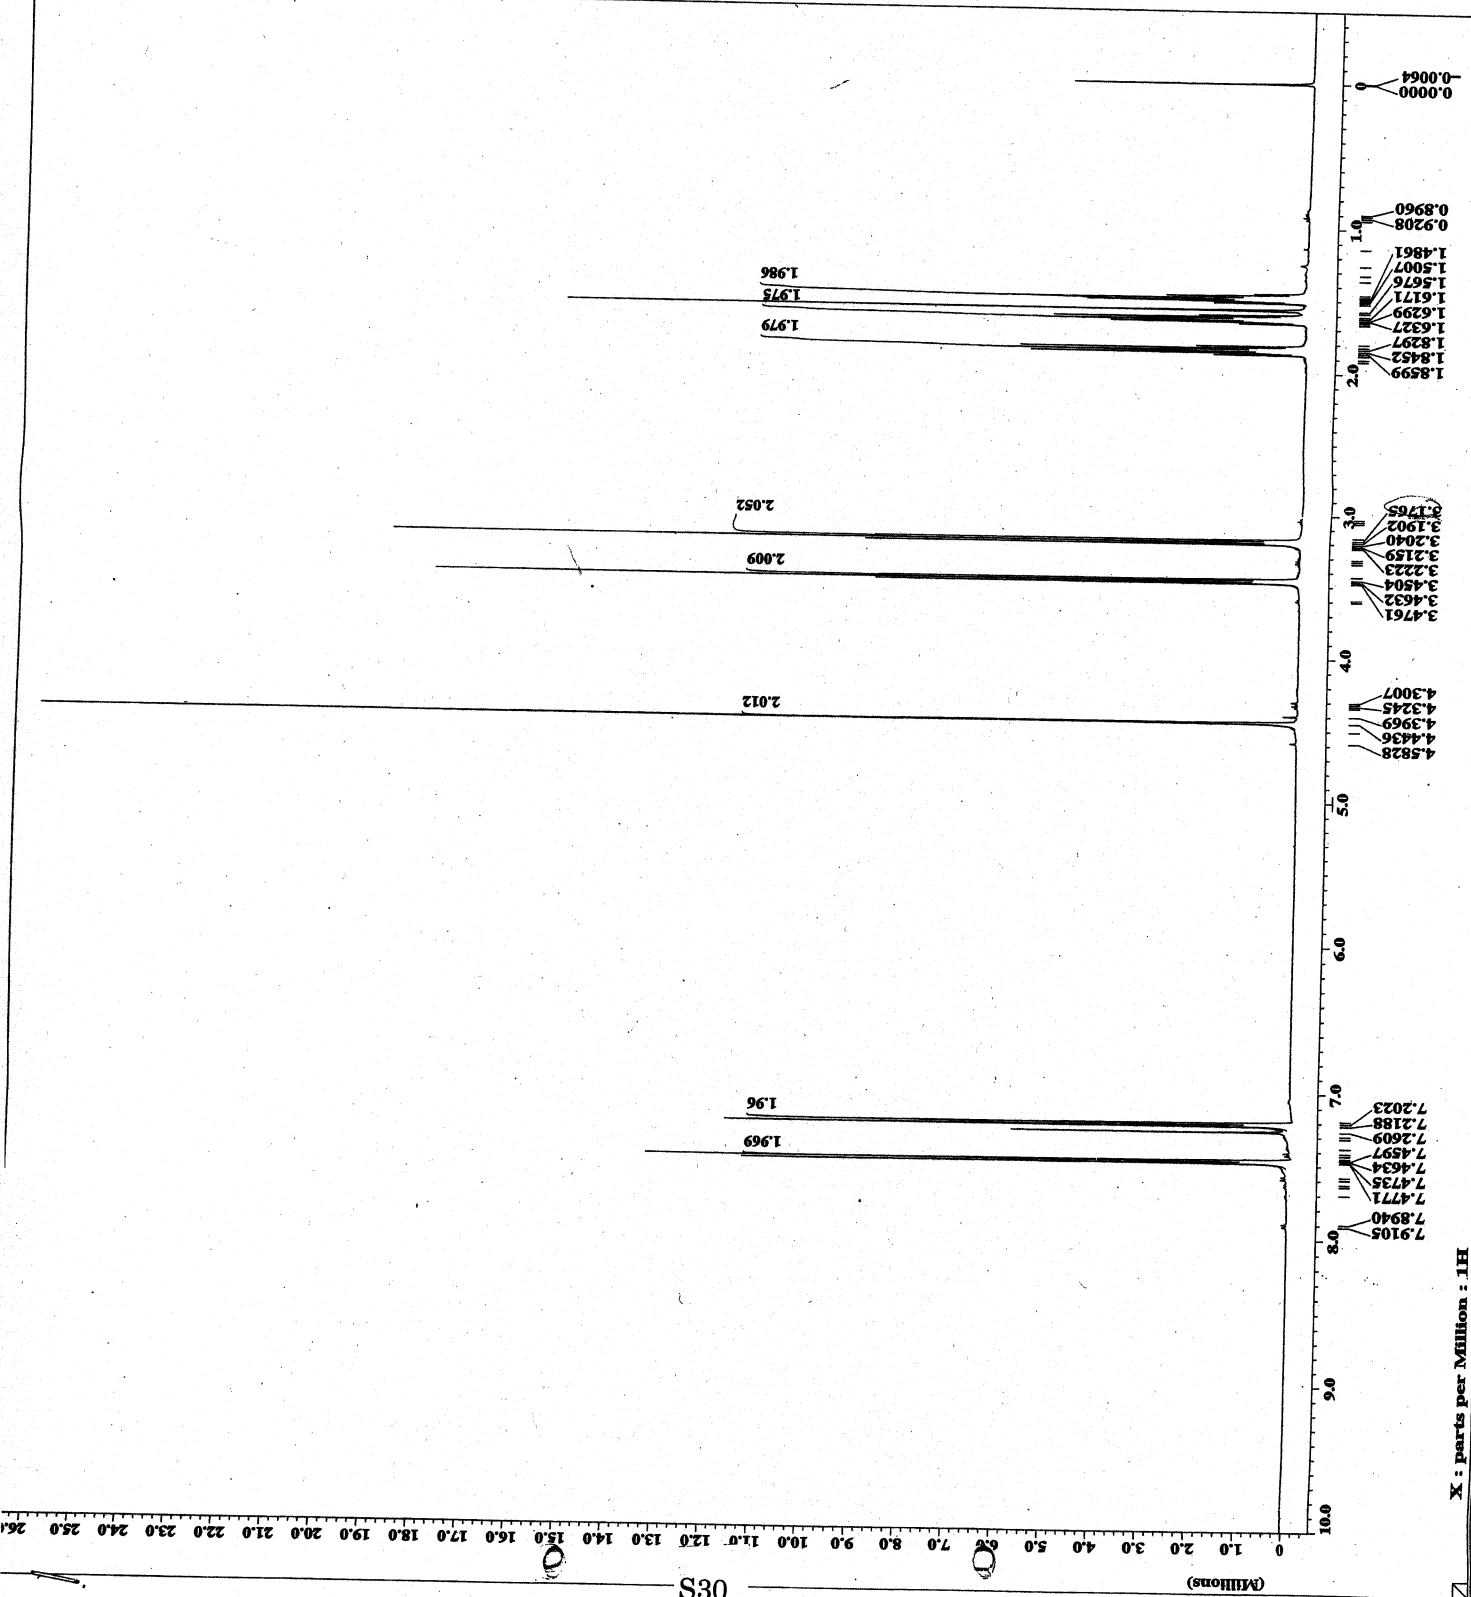

--- ACQUISITION PARAMETERS ---  
 File Name : 14\_13c\_spectrum.156  
 Author :  
 Sample ID : RST-022  
 Content : Single Pulse with Broad  
 Creation Date : 3-JUN-2006 23:53:43  
 Revision Date : 5-JUN-2006 09:41:37  
 Spec Site : MCP500  
 Spec Type :  
 Data Format :  
 Data Name :  
 Data Title :  
 Data Size : 32768  
 Data Units : [ppm]  
 Scans : 400  
 X offset : 13c  
 X offset : 100 [ppm]  
 X freq : 125.77787547 [MHz]  
 X sweep : 31.44654088 [kHz]  
 Solvent : CHLOROFORME-D  
 Salt :  
 Temp Set : 24.5 [C]  
 Recv Gain : 30  
 Field strength : 11.7473579 [T]  
 Filter Mode : HETCORHANCE  
 Filter Width : 15.7266221 [kHz]

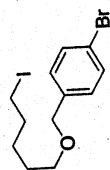

1h

831

(Billions)

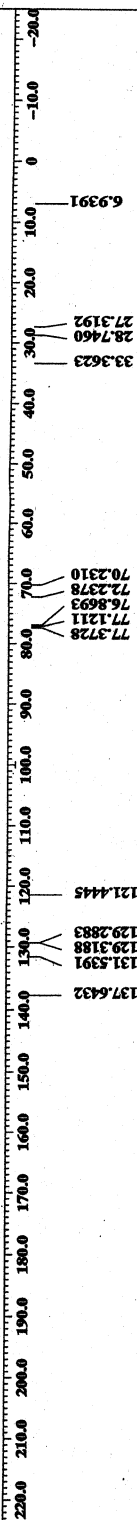

X : parts per Million : 13C

ACQUISITION PARAMETERS  
 File Name : 1d\_spectrum.108  
 Author :  
 Sample ID : M0-126-452-3  
 Creation Date : 7-JUN-2006 11:07:00  
 Revision Date : 8-JUN-2006 21:33:21  
 Spec Site : MCP500  
 Spec Type : 1D COSY  
 Data Format : 1D COSY  
 Dimensions : 1H  
 Num Title : 1H  
 Num Size : 16384  
 Num Bits : 16  
 Num Channels : 1  
 Mod\_return : 1H  
 X\_domain : 5[ppm]  
 X\_offset : 500.13241602[MHz]  
 X\_freq : 500.13241602[MHz]  
 Solvent : CDCl3  
 Spin\_get : 17[Hz]  
 Temp\_get : 22.9[deg]  
 Acq\_gain : 15  
 Filter\_strength : 11.747357917  
 Filter\_width : 3.75119936[Hz]

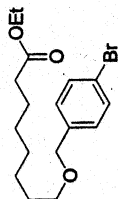

3h

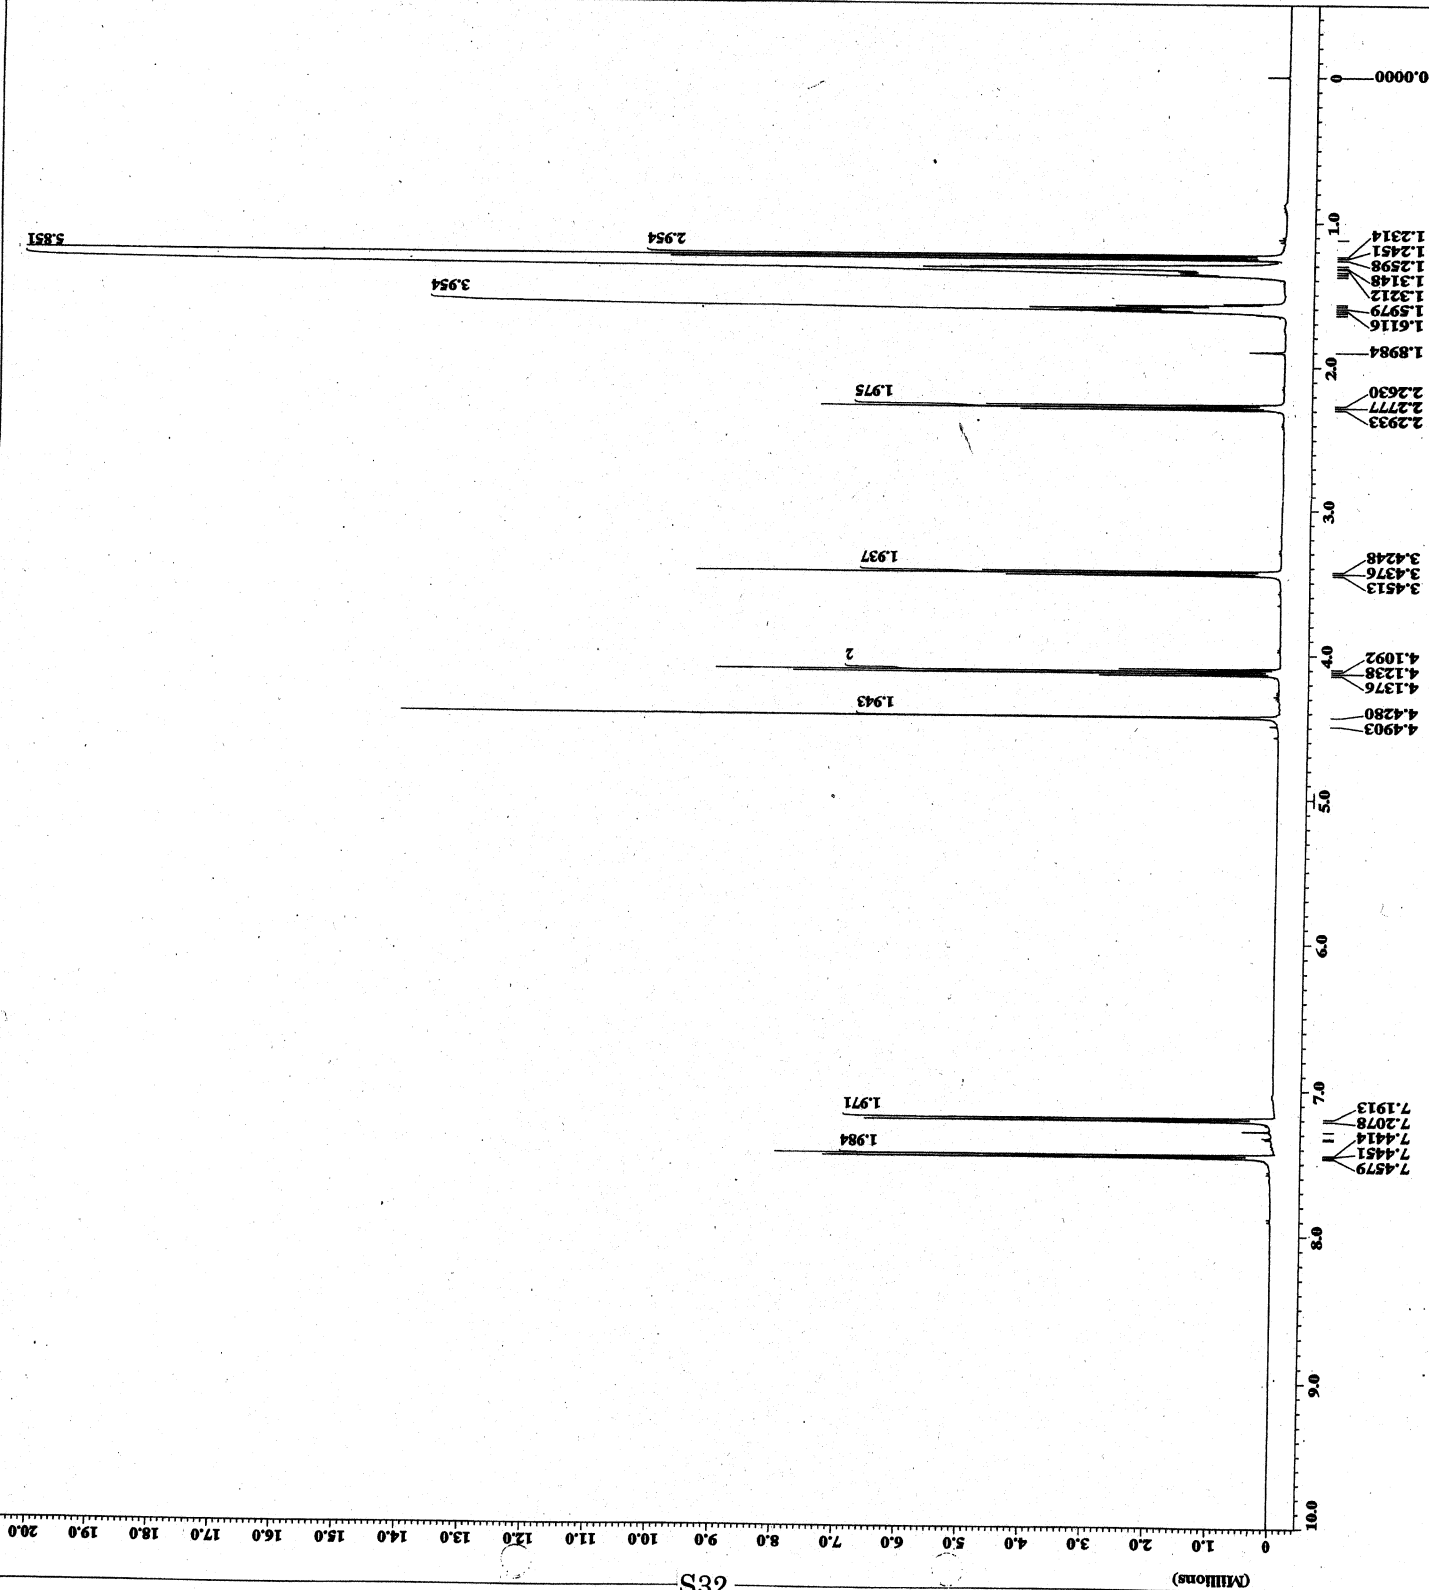

X : parts per Million : 1H



--- ACQUISITION PARAMETERS ---  
 File Name = 1d\_13c\_spectrum.180  
 Author =  
 Sample ID = HFO-136-E2-3-2  
 Comments = Single Pulse with Broad  
 Creation Date = 7-JUN-2006 11:25:17  
 Revision Date = 8-JUN-2006 21:49:39  
 Spec Site = MZ500  
 Spec Type = HMQC\_1H  
 Data Format = 1D Convent  
 Dimensions = 13C  
 Dim title = 32768  
 Dim size = 100  
 Dim units = [ppm]  
 Mod\_return = 13C  
 X\_domain = 100 [ppm]  
 X\_offset = 125.77787547 [MHz]  
 X\_freq = 125.77787547 [MHz]  
 X\_name = 13C  
 Solvent = CDCl3  
 Spin\_set = 13 [Hz]  
 Temp\_set = 23.5 [deg]  
 Nuc1\_gain = 30  
 Nuc1\_offset = 1.7473579 [Hz]  
 Filec\_name = 1d\_13c\_spectrum.180  
 Filec\_size = 15.72864221 [KHz]

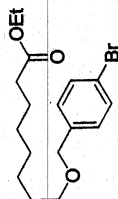

3h

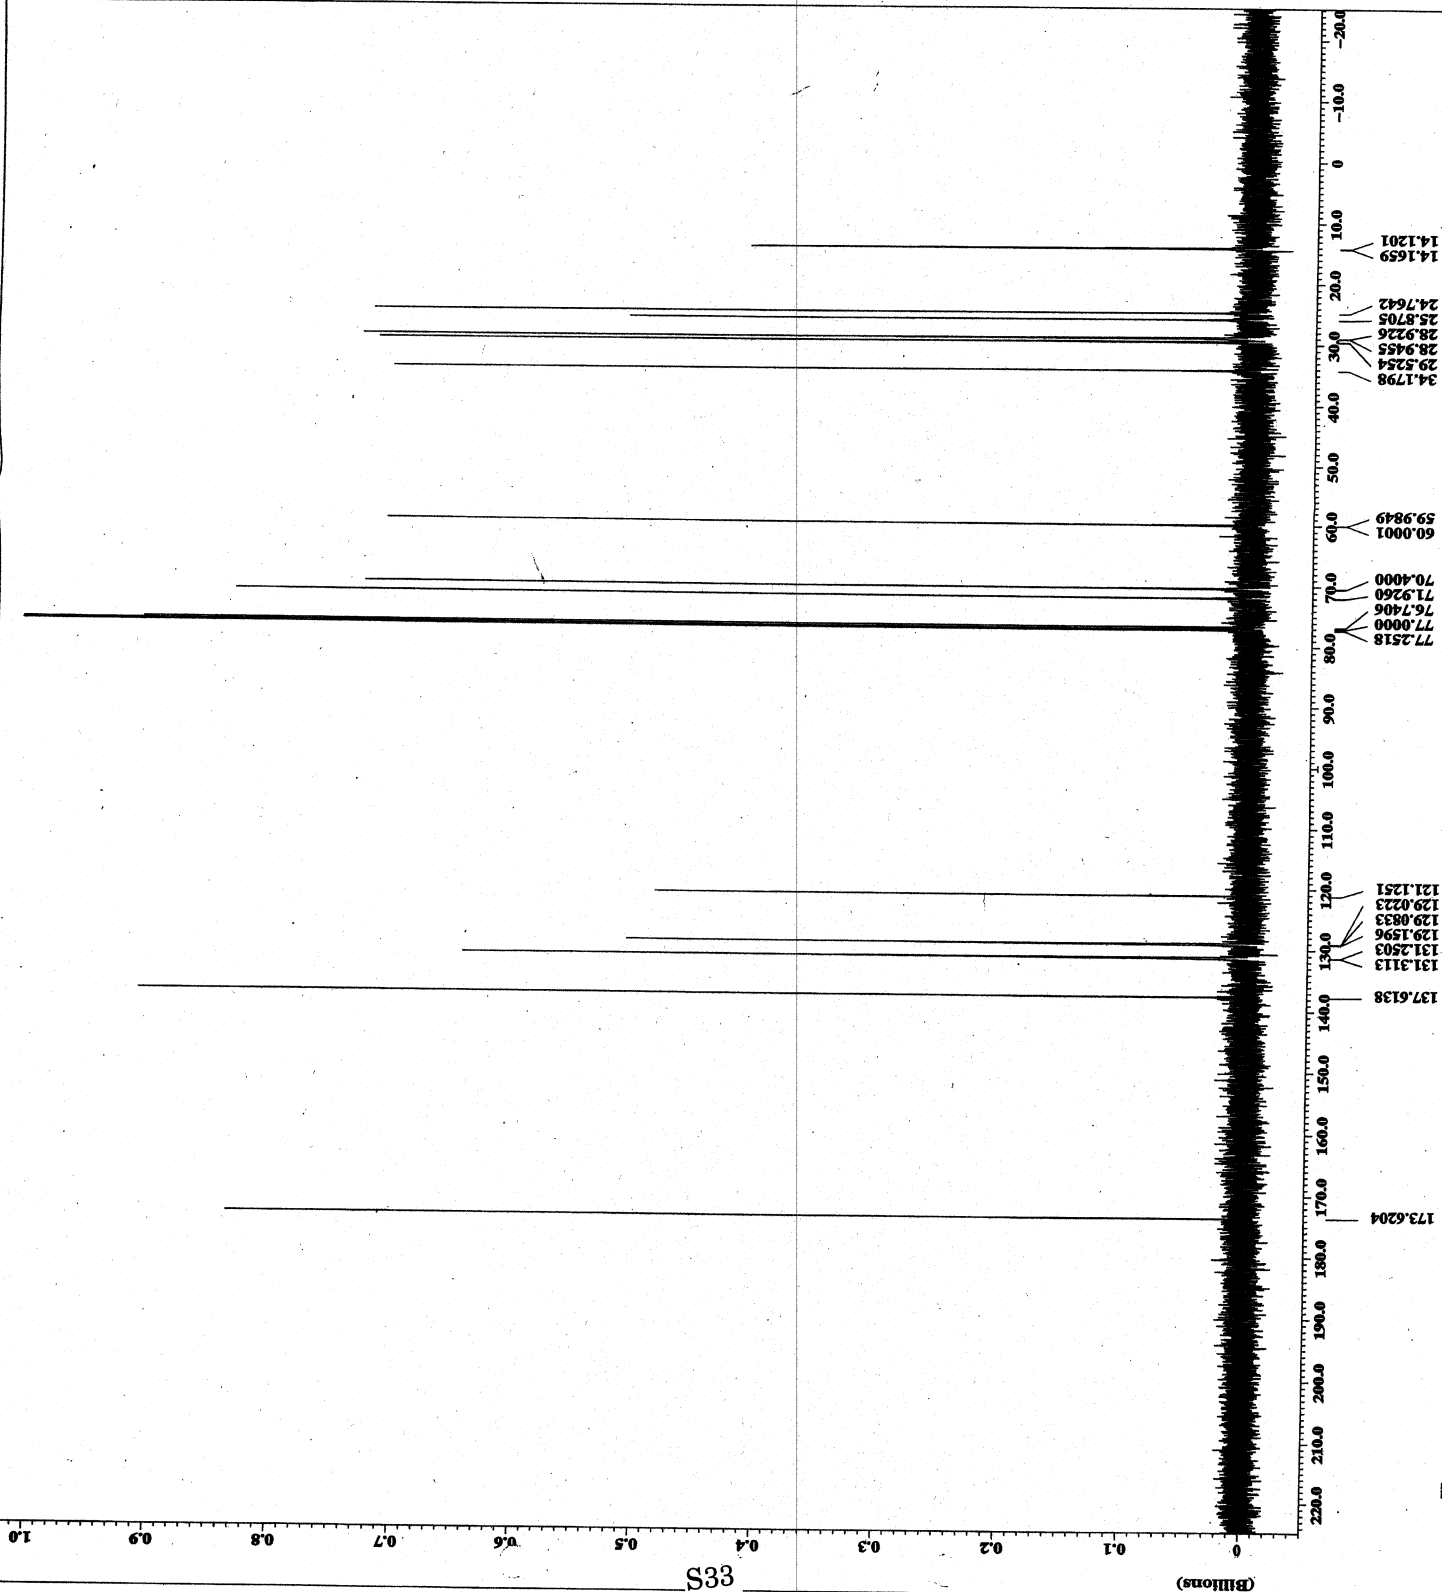

X : parts per Million : 13C

----- ACQUISITION PARAMETERS -----  
 File Name = 1d\_spectrum.2964  
 Author =  
 Sample ID =  
 Content = Single Pulse Experiment  
 Creation Date = 20-OCT-2007 14:33:32  
 Revision Date = 22-OCT-2007 09:12:02  
 Spec Site = KCP500  
 Spec Type = 1H/29A\_1H  
 Relaxation = 10.000000  
 Dimensions = 1H  
 Dim Title = 16384  
 Dim Size = 16384  
 Dim Units = Deg  
 Mod Return = 10  
 X\_domain = 1H  
 X\_offset = 51ppm  
 X\_freq = 500.13241602 [MHz]  
 X\_resol = 7.50750751 [Hz]  
 Acq\_method = 1D  
 Solvent = CDCl3  
 Spin\_get = 16 [Hz]  
 Temp\_get = 24.7 [deg]  
 Recvr\_gain = 25  
 Field\_strength = 11.7473579 [T]  
 Pulse\_prog = zgpg30  
 Filten\_width = 1.75119936 [Hz]

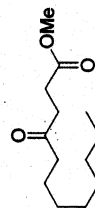

31

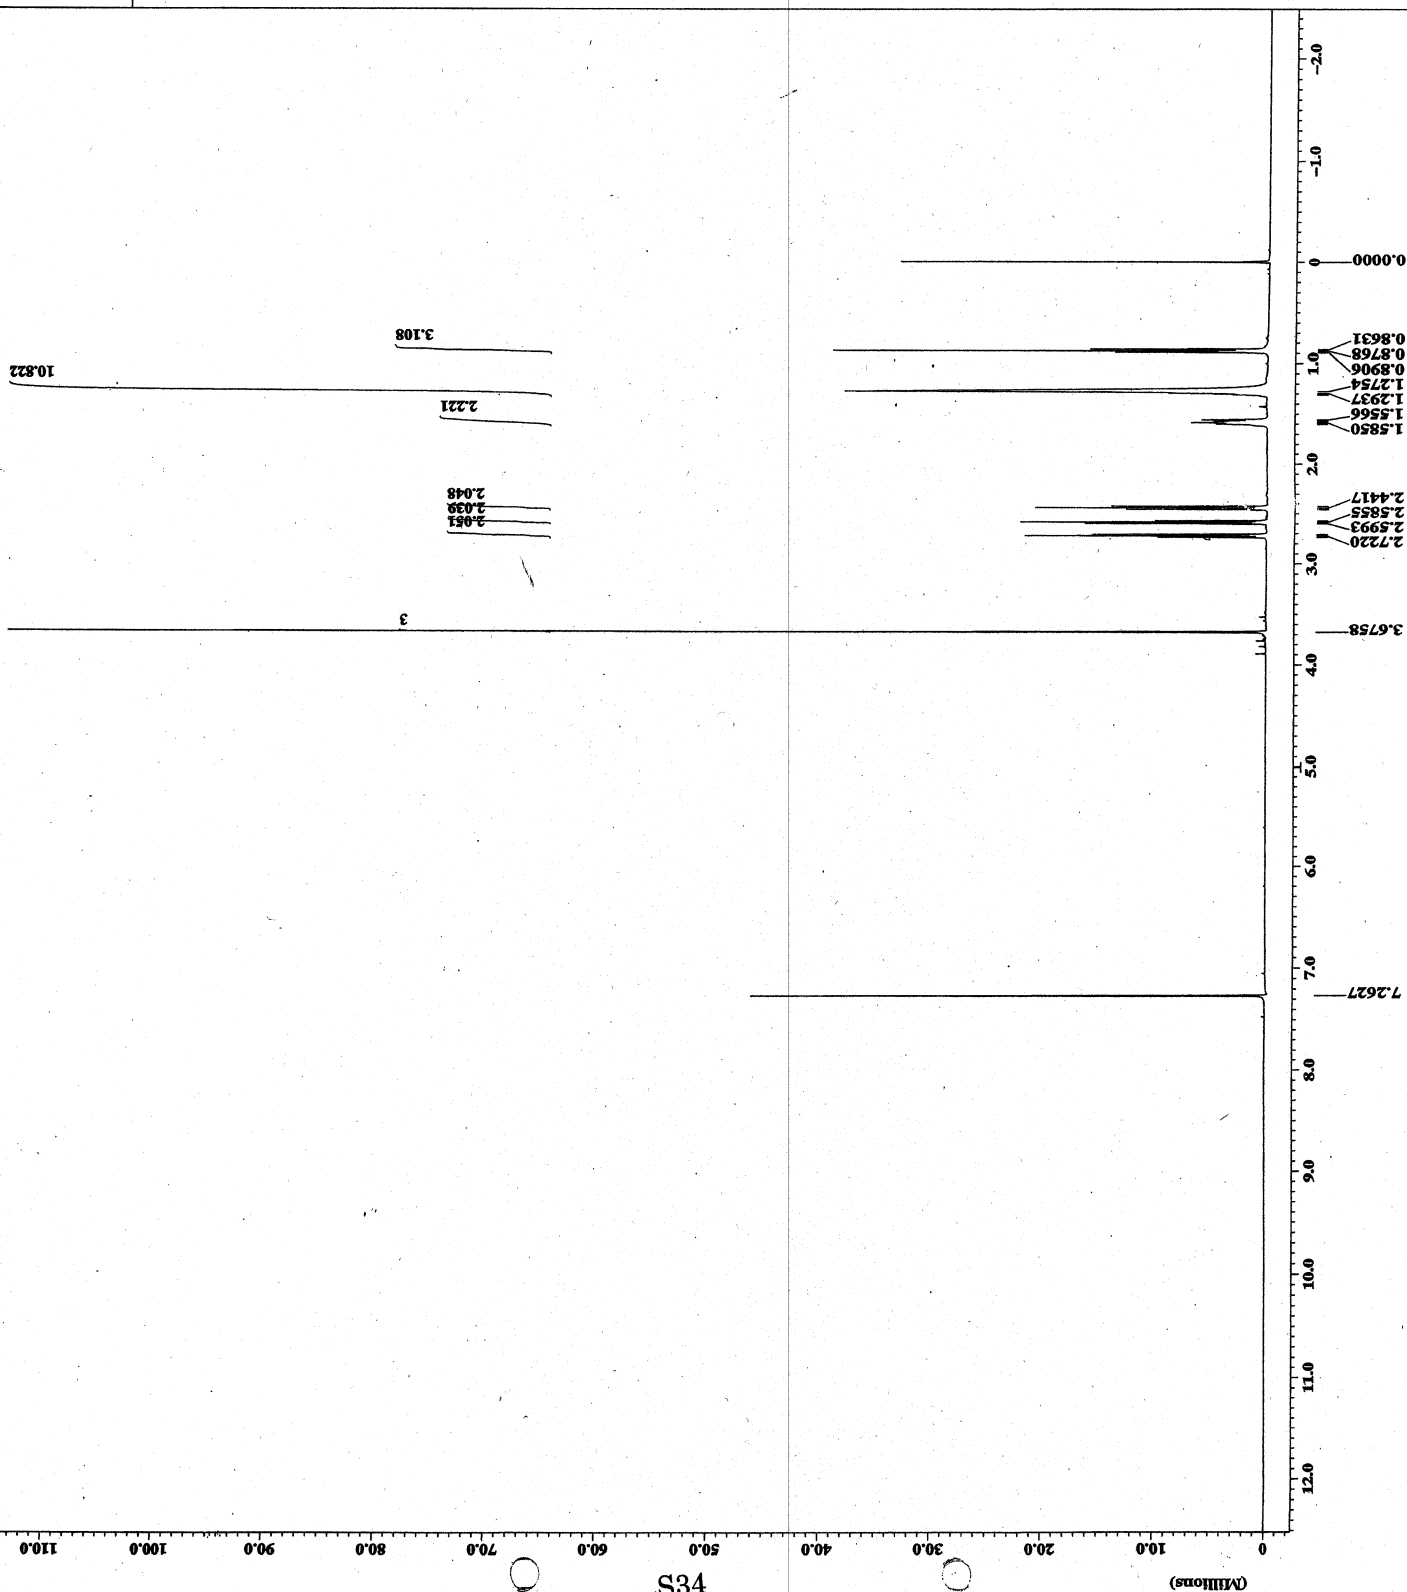

**ACQUISITION PARAMETERS**  
 File Name: 14\_13c\_spectrum.30  
 Author: R  
 Sample ID: Single Pulse with Broad  
 Creation Date: 20-OCT-2007 14:56:05  
 Revision Date: 22-OCT-2007 09:32:41  
 Spec File: MCP500  
 Spec Type: 1D COSY  
 Data Format: 1D COSY  
 Dimensions: 13C  
 Num Title: 13C  
 Num Size: 32768  
 Num Units: 13C  
 Num: 433  
 Mod\_return: 1  
 X\_domain: 13C  
 X\_offset: 100ppm  
 X\_freq: 125.77787547[MHz]  
 X\_solvent: CDCl3  
 Solvent: CHLOROFORM-D  
 Spin\_set: 17Hz  
 Temp\_set: 26.4[°C]  
 Acq\_gain: 30  
 Filter: 13C Length: 21.7473579[F]  
 Filter: 13C Width: 15.72866221[MHz]  
 Filter\_width: 15.72866221[MHz]

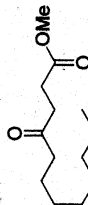

3i

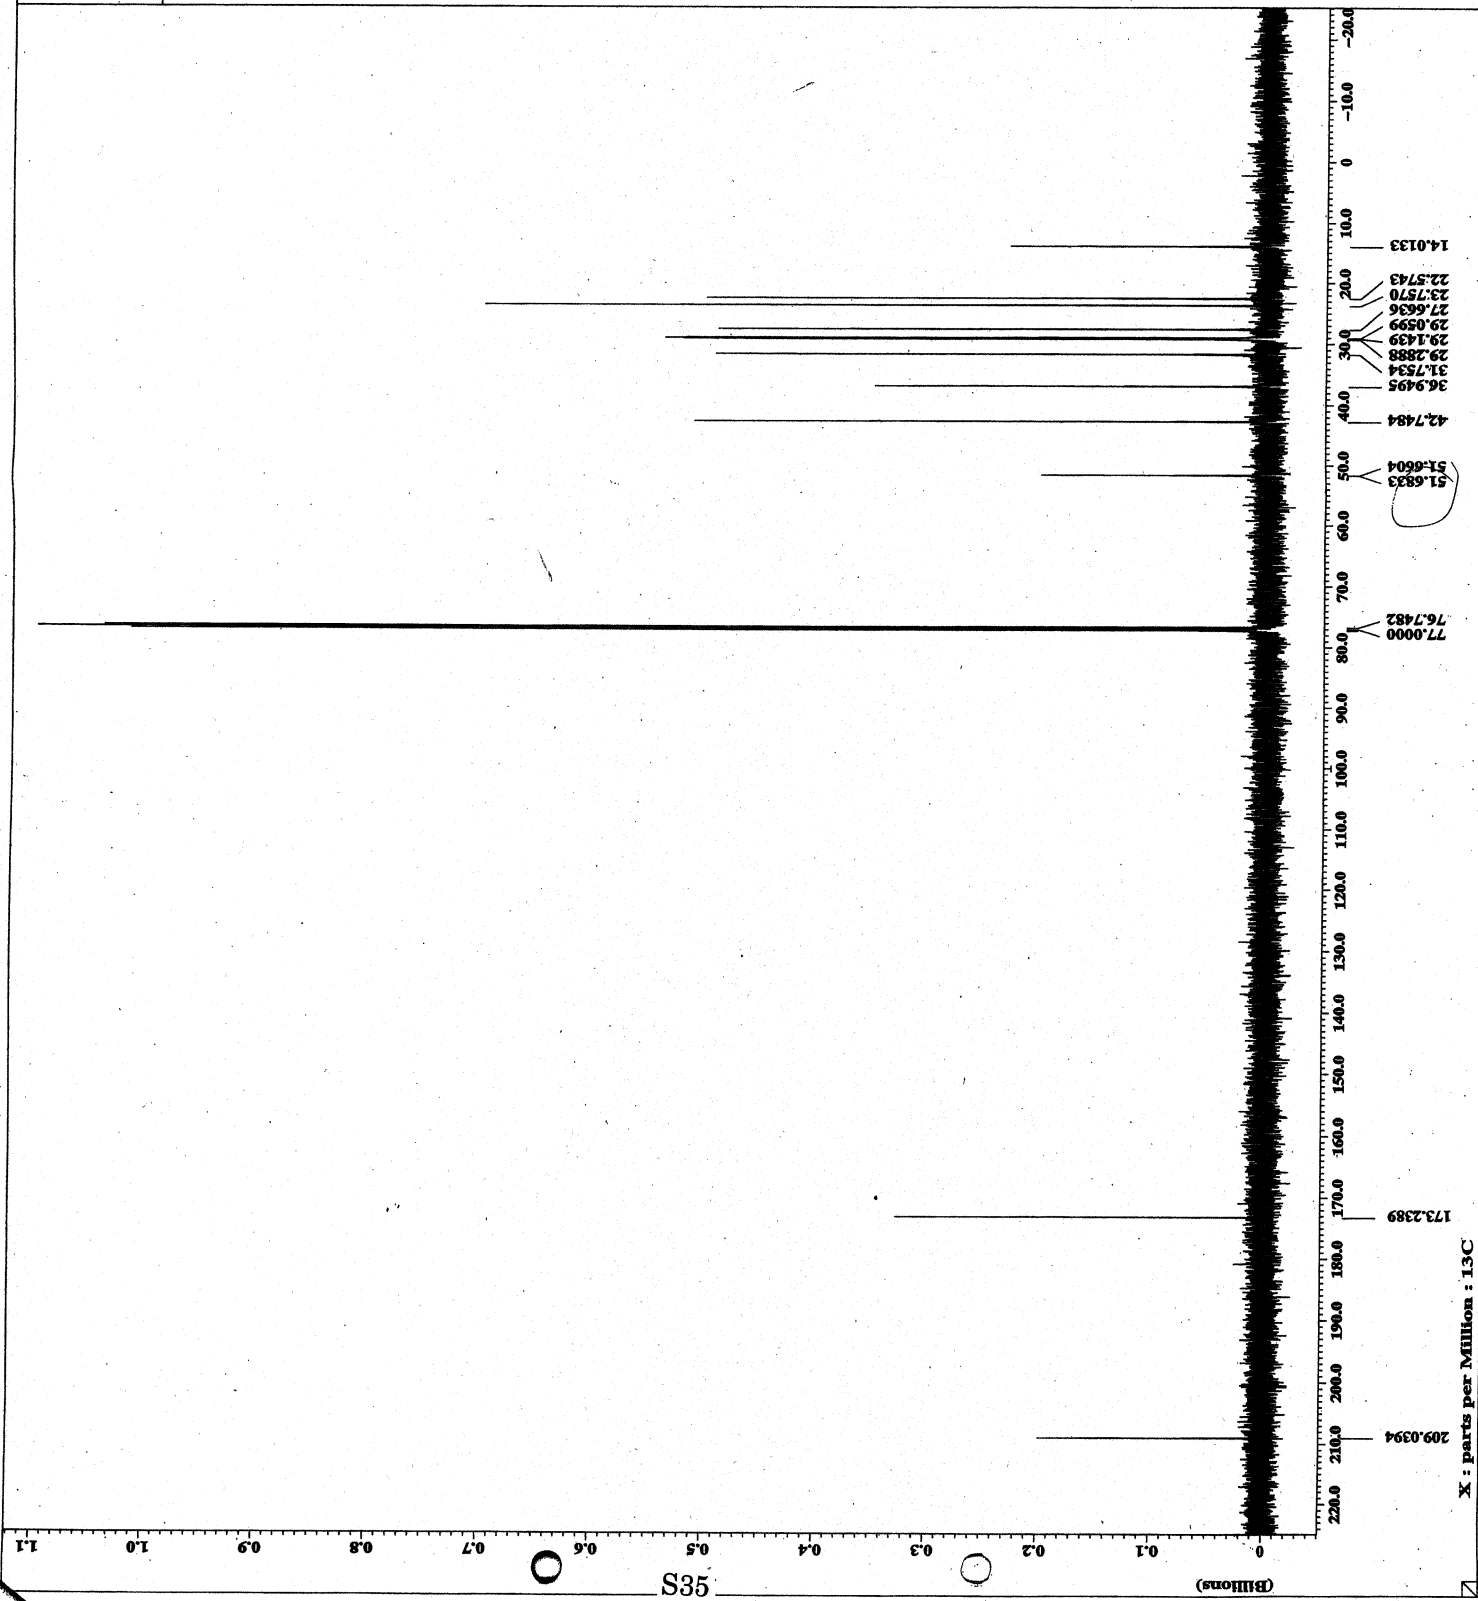

**ACQUISITION PARAMETERS**  
 File Name : 1d\_spectrum\_3419  
 Sample ID : 1150/1515-29  
 Context : Single Pulse Experiment  
 Creation Date : 31-Oct-2007 10:40:15  
 Revision Date : 2-Nov-2007 05:29:15  
 Spec Site : MZ500  
 Spec Type : 1D NMR  
 Data Format : 1D COMPLEX  
 Dimensions : 1  
 Num Title : 1  
 Num Date : 10884  
 Num Units : 1  
 Scans : 1  
 Mod\_return : 1  
 X\_domain : 1  
 X\_offset : 1  
 X\_phase : 1  
 X\_sweep : 1  
 Solvent : CHLOROFORM-D  
 Spin\_set : 16[Hz]  
 Temp\_set : 24.9[deg]  
 Field\_strength : 11.7471579[T]  
 Filter\_mode : MUYSSONWALTZ  
 Filter\_width : 3.75119936[Hz]

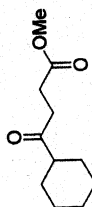

3j

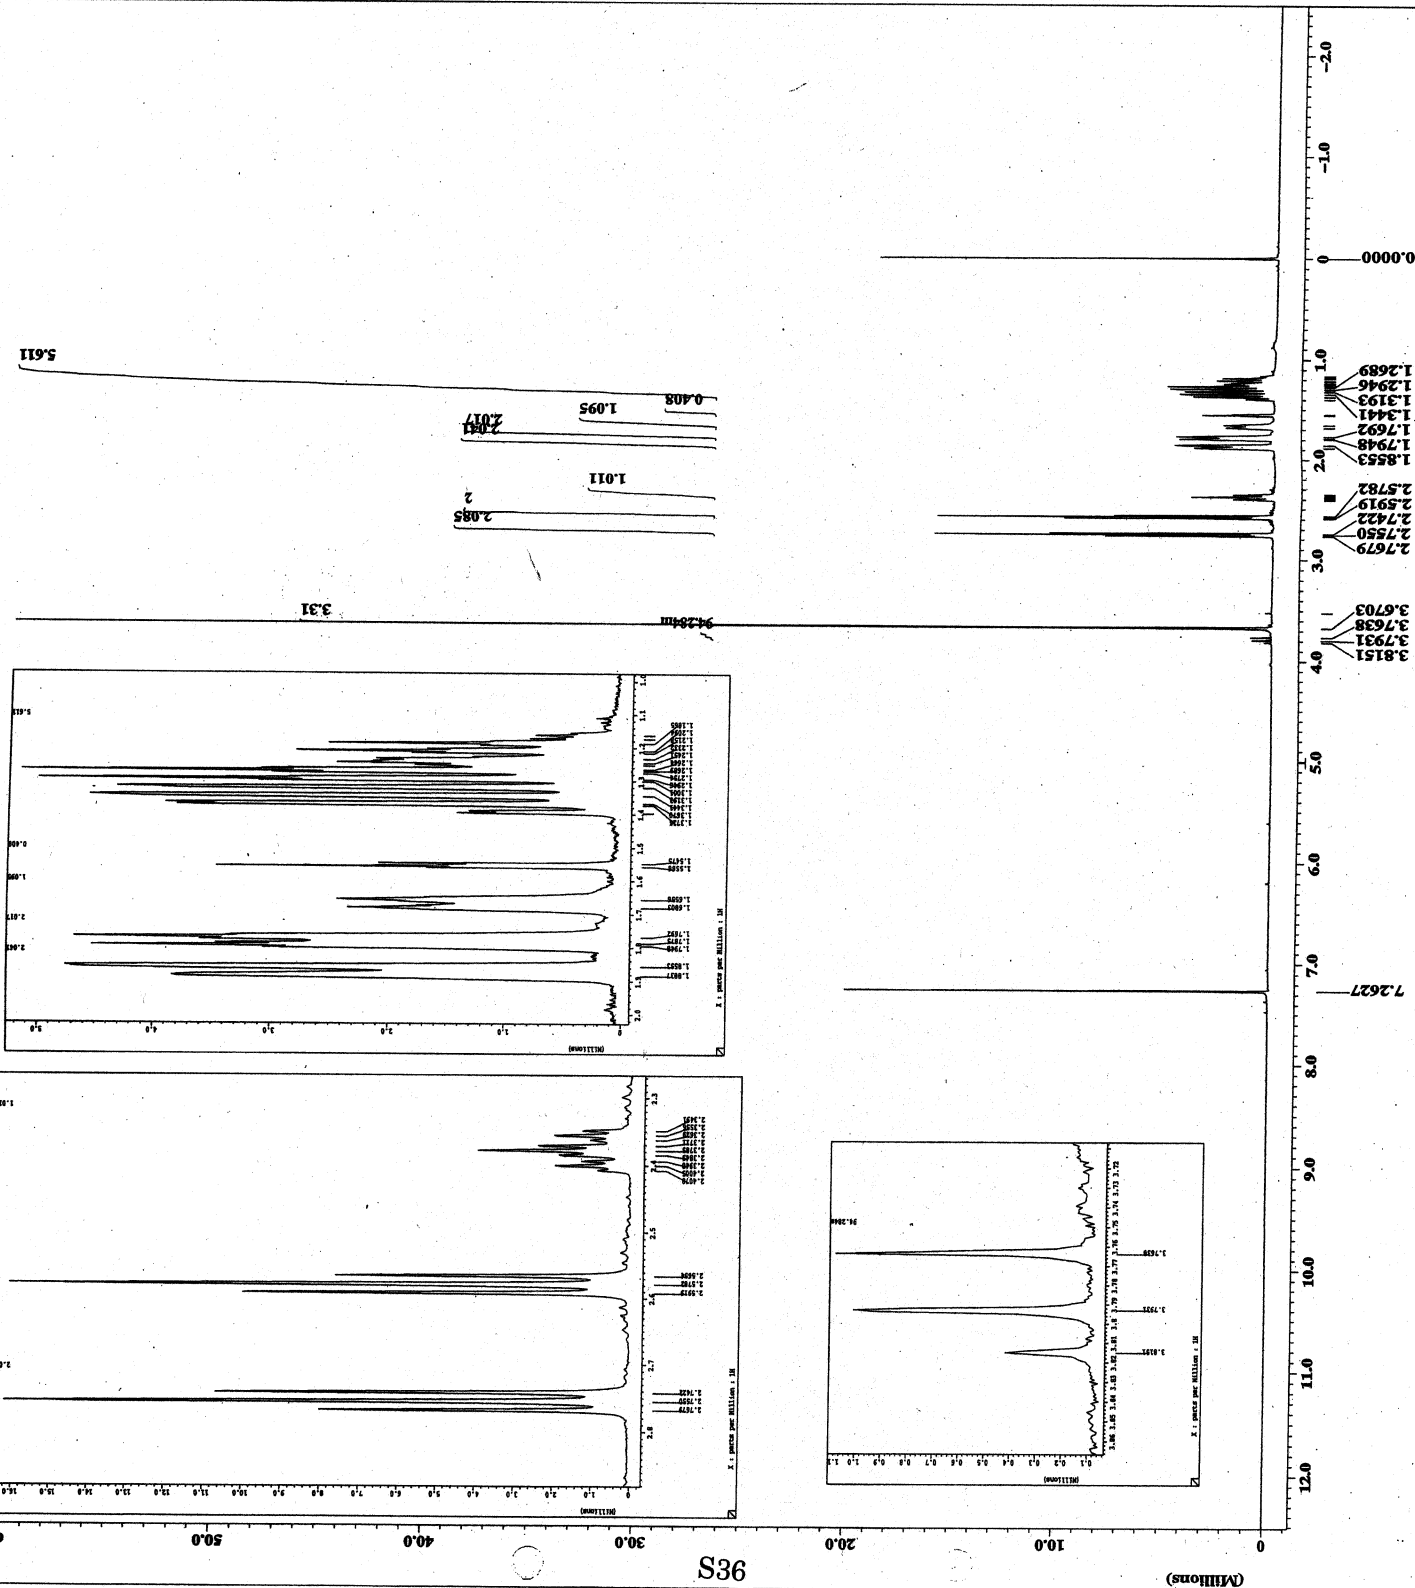

ACQUISITION PARAMETERS  
File Name: 10\_13c\_spectrum.182  
Author: c  
Sample ID: c  
Content: Single Pulse with Broad  
Creation Date: 7-NOV-2007 14:52:37  
Revision Date: 9-NOV-2007 09:48:59  
Spec Site: KCP500  
Spec Type: MEXZA\_MMR  
Data Format: 1D COMPLEX  
Data Size: 13C  
Data Title: 13C  
Data Size: 32768  
Data Units: [ppm]  
Scan: 153  
X1\_start: 13C  
X1\_offset: 100 [ppm]  
X\_freq: 125.77767547 [MHz]  
X\_swap: 31.44654088 [kHz]  
Solvent: CDCl3  
Pulse: zgpg30  
Temp\_set: 25.5 [degC]  
Recov\_gain: 30  
Field\_strength: 11.7473579 [T]  
Filter\_mode: HETCORH2H  
Filter\_width: 13.72066221 [kHz]

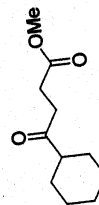

3j

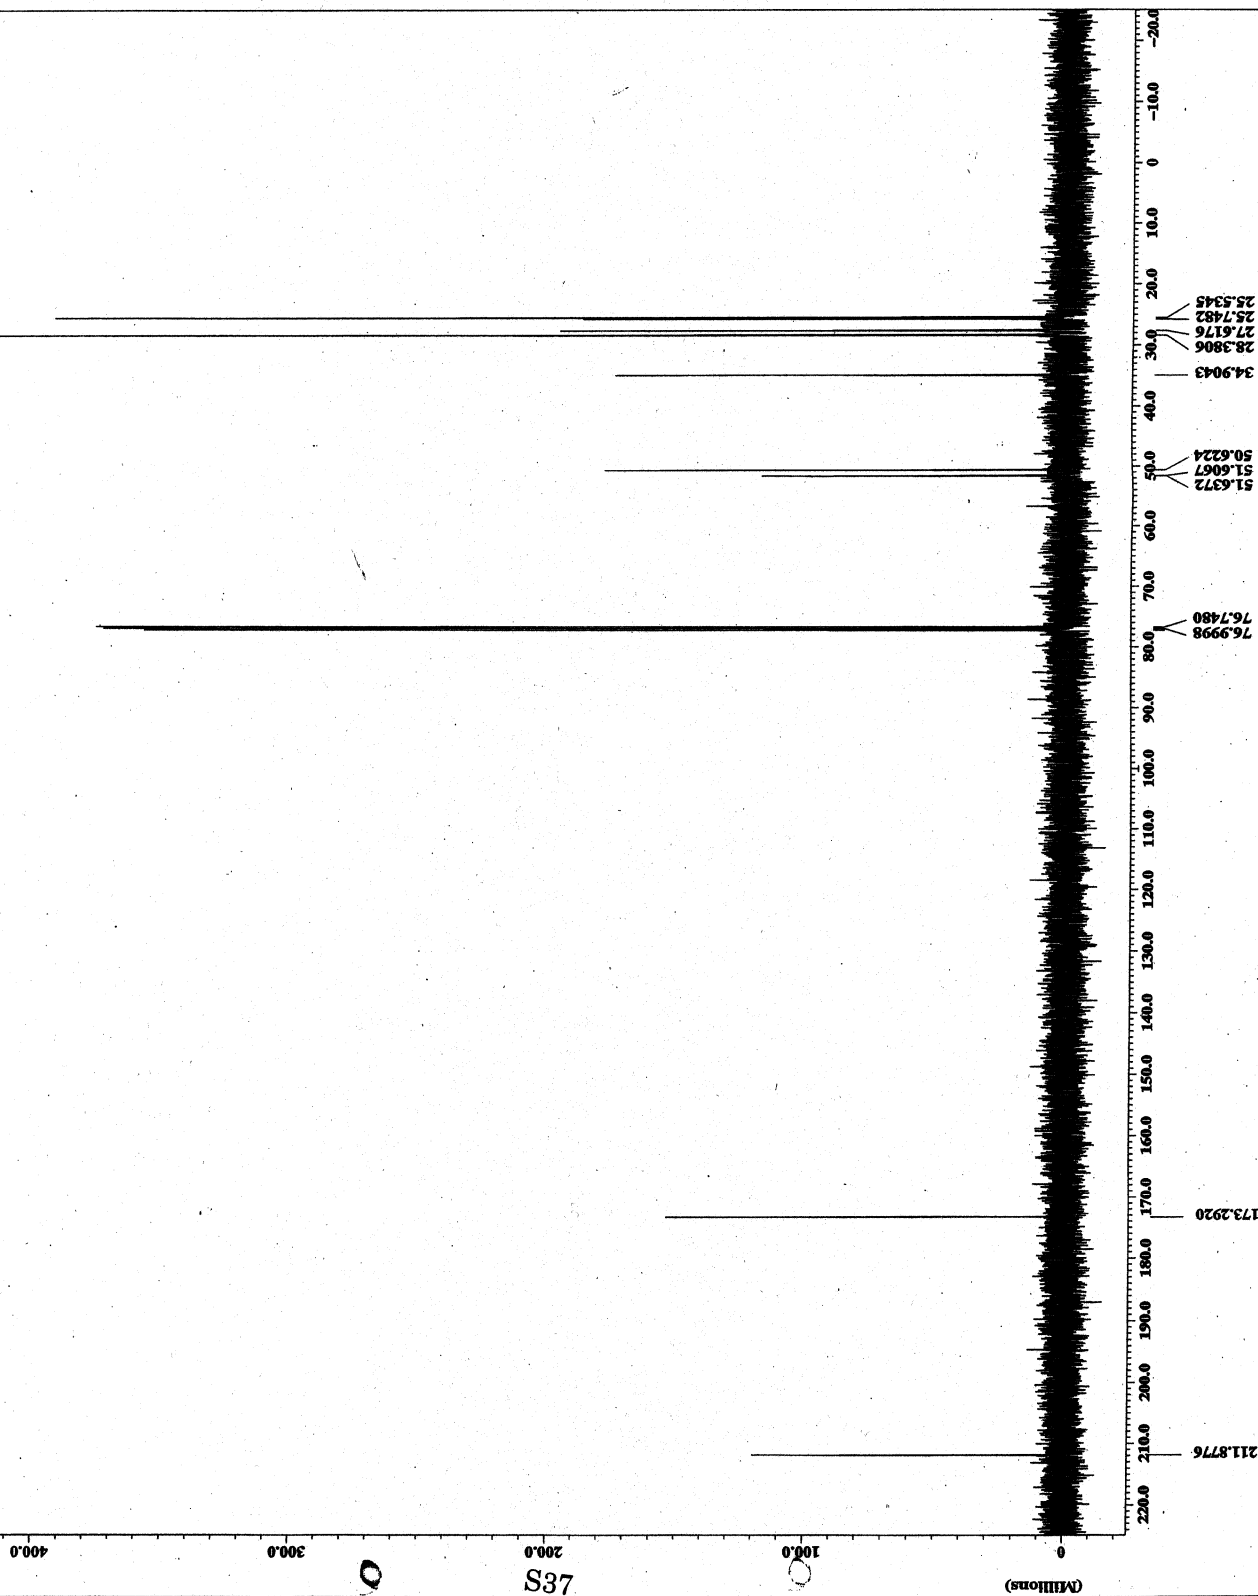

X : parts per Million : 13C

--- ACQUISITION PARAMETERS ---  
 File Name = 14\_spectrum.190  
 Author =  
 Sample ID =  
 Experiment = Single Pulse Experiment  
 Creation Date = 20-MAR-2007 19:10:22  
 Revision Date = 22-MAR-2007 13:53:39  
 Spec Site = RCP500  
 Spec Type = 1H/2D  
 Data Format = 1D  
 Dimensions = 1H  
 Dia Title = 16384  
 Dia Size = 16384  
 Dia Units = [ppm]  
 Name = 1  
 Mod\_return = 1H  
 X\_domain = 5 [ppm]  
 X\_offset = 500.16241602 [MHz]  
 X\_freq = 7.50750751 [MHz]  
 Solvent = CDCl3  
 Spin\_get = 14 [ms]  
 Temp\_get = 21.6 [deg]  
 Acq\_gain = 24  
 Recv\_strength = 11.7473579 [V]  
 Filter\_strength = 0.00000000  
 Filter\_width = 3.75119936 [Hz]

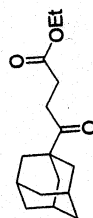

3k

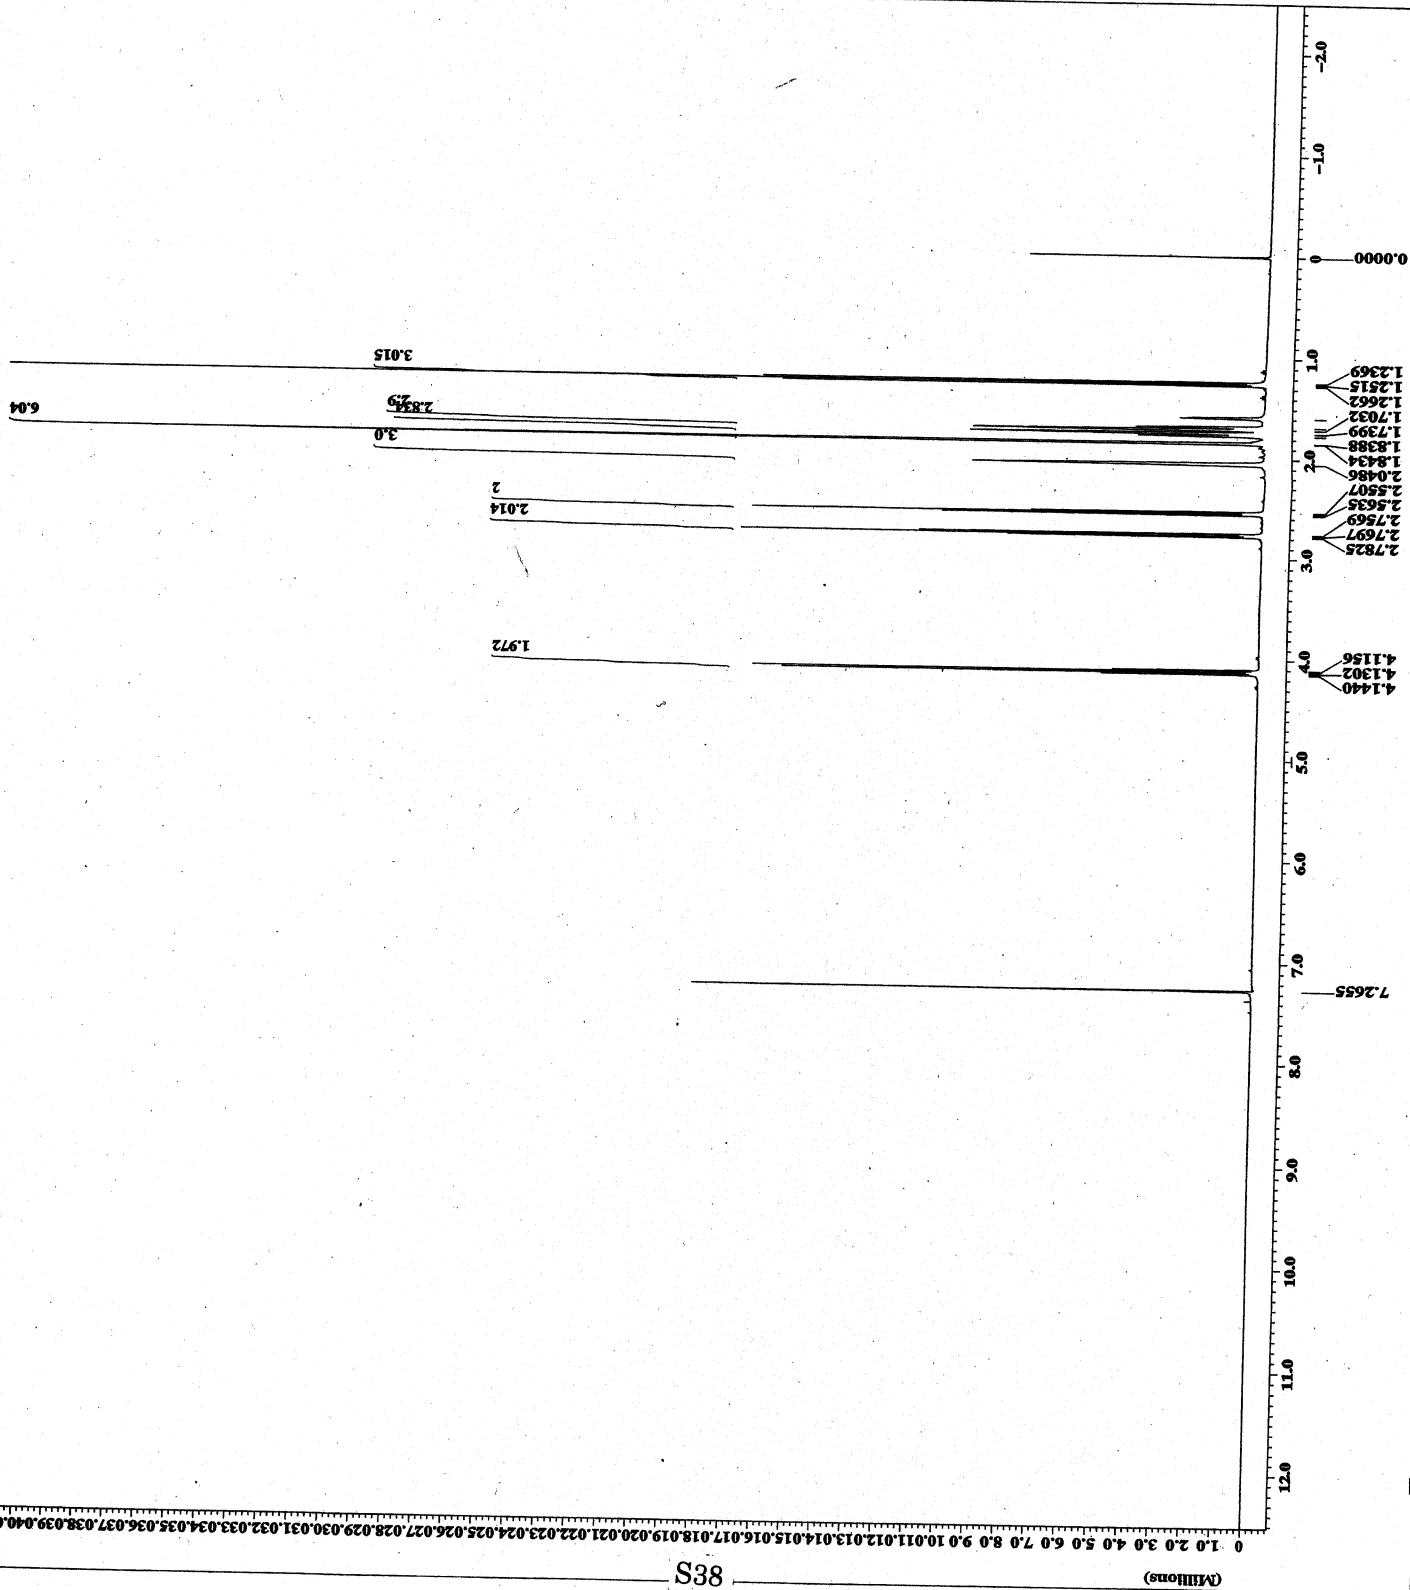

X : parts per Million : 1H



--- ACQUISITION PARAMETERS ---  
File Name = 1d\_spectrum\_499  
Author =  
Sample ID = R07-205-fs1-7  
Content = Single Pulse Experiment  
Creation Date = 31-mar-2007 11:04:36  
Revision Date = 2-Apr-2007 00:57:21  
Spec Site = R07300  
Spec Type = MZETA\_MMR  
Data Format = 1D COMPLEX  
Data Points = 1  
Data Size = 16384  
Data Units = [ppm]  
Scans = 8  
Acq\_return = 1  
X\_offset = 1  
X\_freq = 500.16241602 [MHz]  
X\_sweep = 7.50750751 [kHz]  
Solvent = CHLOROFORM-D  
SpinJet = 16 [Hz]  
Recvr\_gain = 24  
Field\_strength = 11.7473579 [T]  
Filter\_mode = HETCORHCH  
Filter\_width = 3.75119936 [kHz]

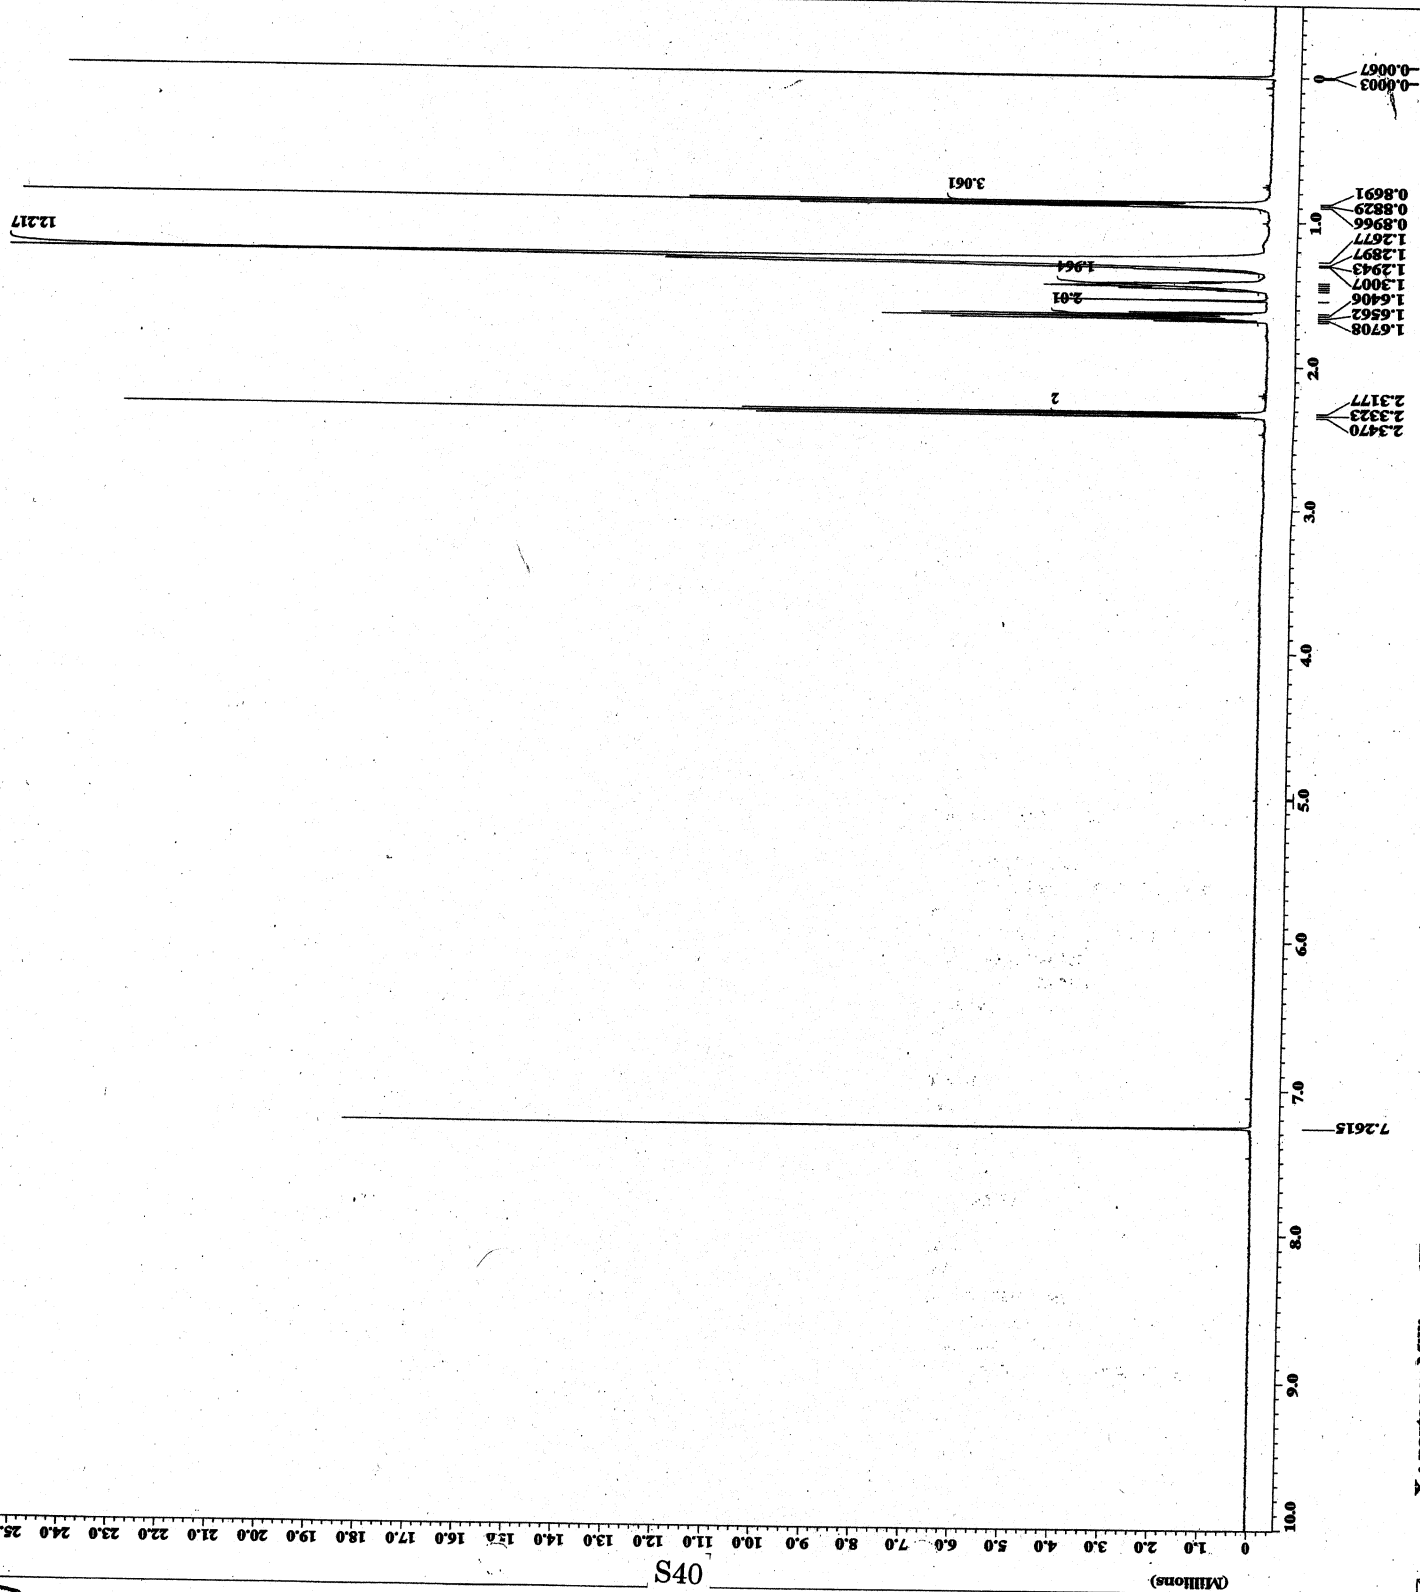



**ACQUISITION PARAMETERS**  
 File Name = 14\_13c\_spectrum.105  
 Author =  
 Sample ID = BPO-205-fid-7  
 Content = Single Pulse with Broad  
 Creation Date = 31-MAR-2007 11:16:42  
 Revision Date = 2-APR-2007 01:07:30  
 Spec Site = MCP500  
 Spec Type = 13C NMR  
 Data Format = 2D COMPLEX  
 Dimensions = 13C  
 Dim title = 32768  
 Dim size = 131  
 Dim units = [ppm]  
 Mod return = 13C  
 X domain = 100 [ppm]  
 X offset = 125.77787547 [MHz]  
 X freq = 31.44654088 [MHz]  
 X temp = 14 [MHz]  
 Spin rate = 25.1 [Hz]  
 Temp set = 30  
 Recvr gain = 11.747379 [V]  
 Filtr\_d strength = 10 [dB]  
 Filtr\_type = 10 [dB]  
 Filtr\_width = 15.7206221 [MHz]

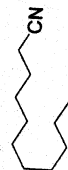

31

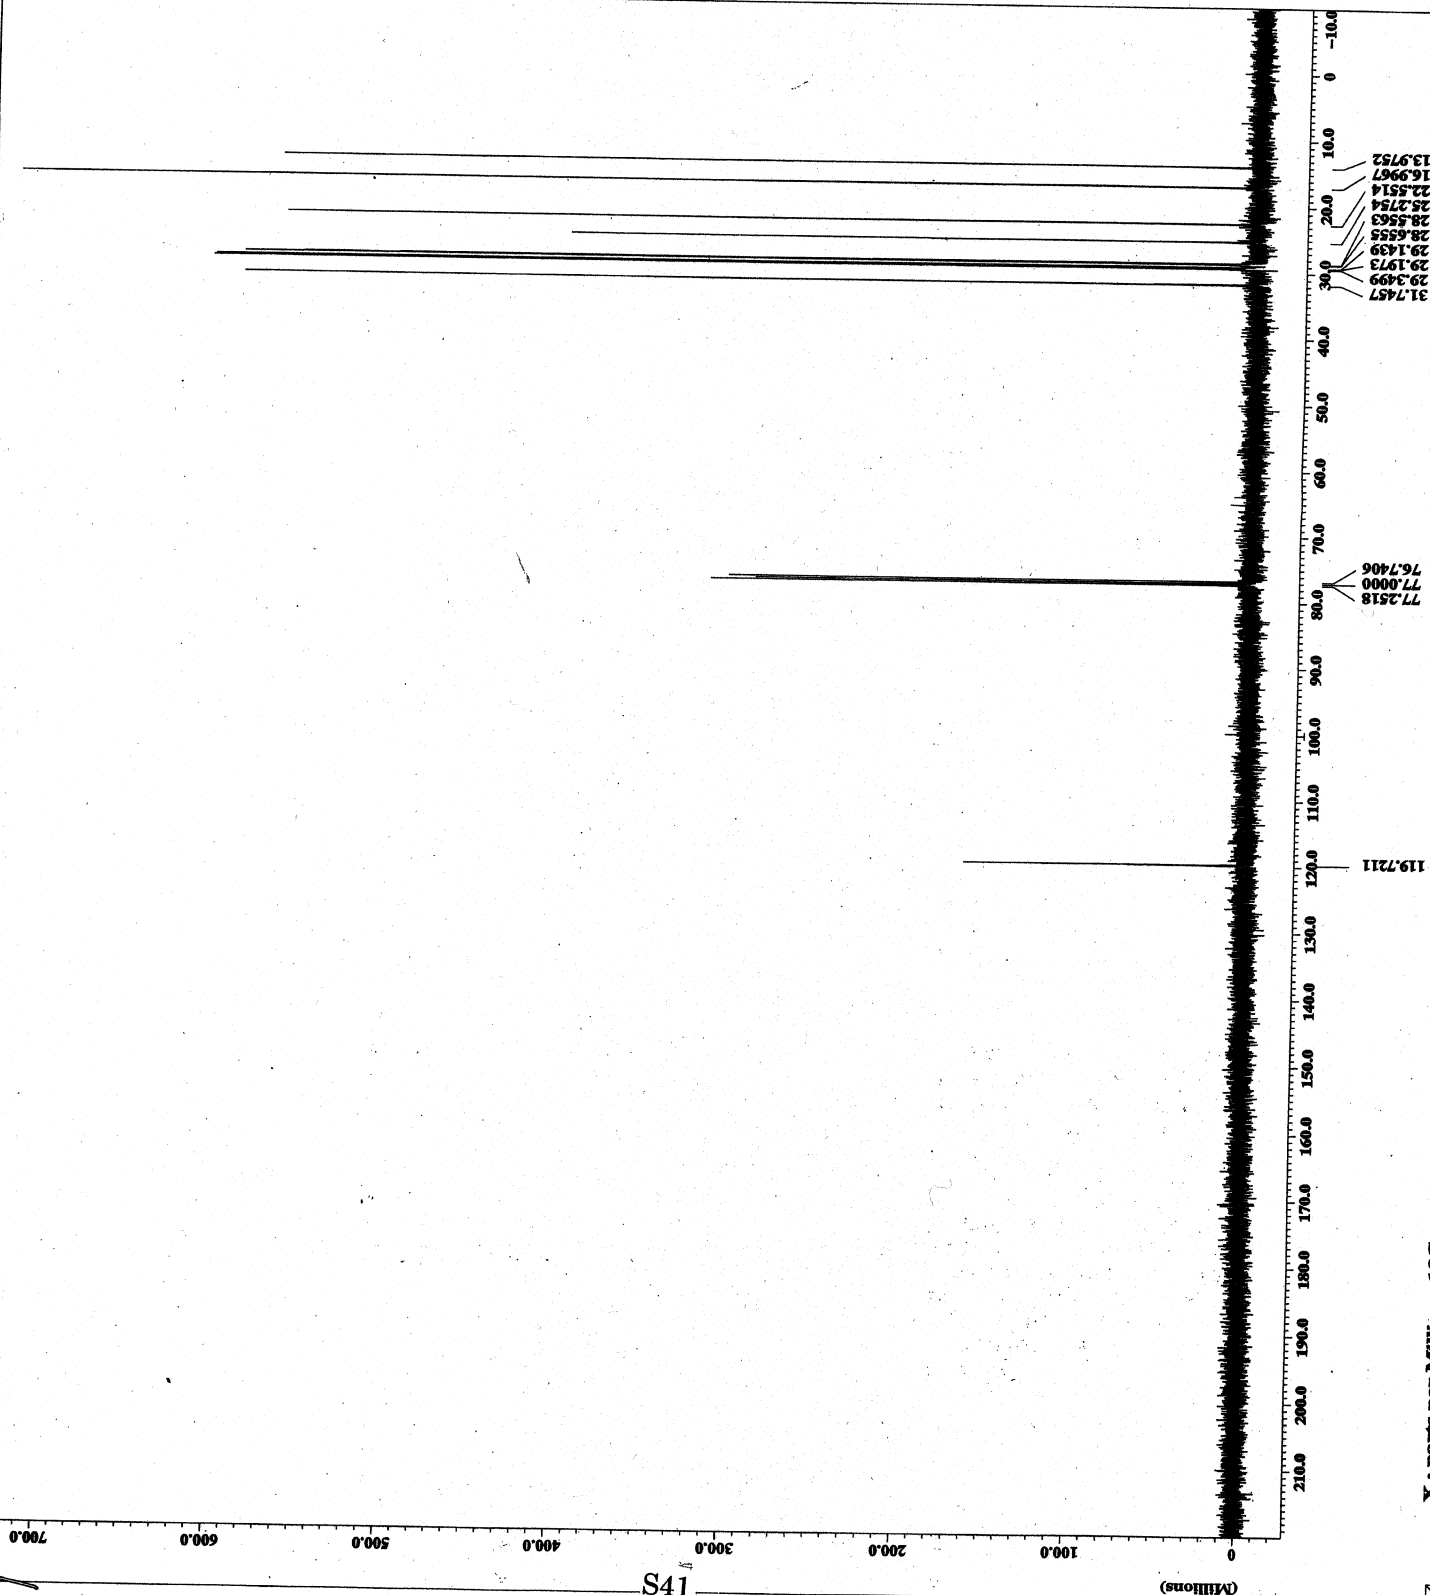

X : parts per Million : 13C

--- ACQUISITION PARAMETERS ---  
 File Name : 14\_spectrum.4151  
 Author :  
 Sample ID : RSU-185-414-5  
 Content : Single Pulse Experiment  
 Creation Date : 28-JUN-2007 17:10:14  
 Revision Date : 30-JUN-2007 05:52:56  
 Spec Site : MCP500  
 Spec Type : NMR  
 Spec Name : 1D COMPLEX  
 Dimensions : 1H  
 Dim Title :  
 Dim Size : 16384  
 Dim Units : [ppm]  
 Num : 4  
 Mod :  
 X :  
 X\_domain : 1H  
 X\_offset : 5 [ppm]  
 X\_freq : 500.16241602 [MHz]  
 X\_resol : 7.50750751 [Hz]  
 X\_acq :  
 X\_ref :  
 Spin :  
 Spin\_set : 24.8 [Hz]  
 Recvz\_gain : 21  
 Field\_strength : 11.7473579 [T]  
 Pulse\_mode : HETEROMODE  
 Filter\_width : 3.75119936 [Hz]

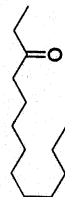

3m

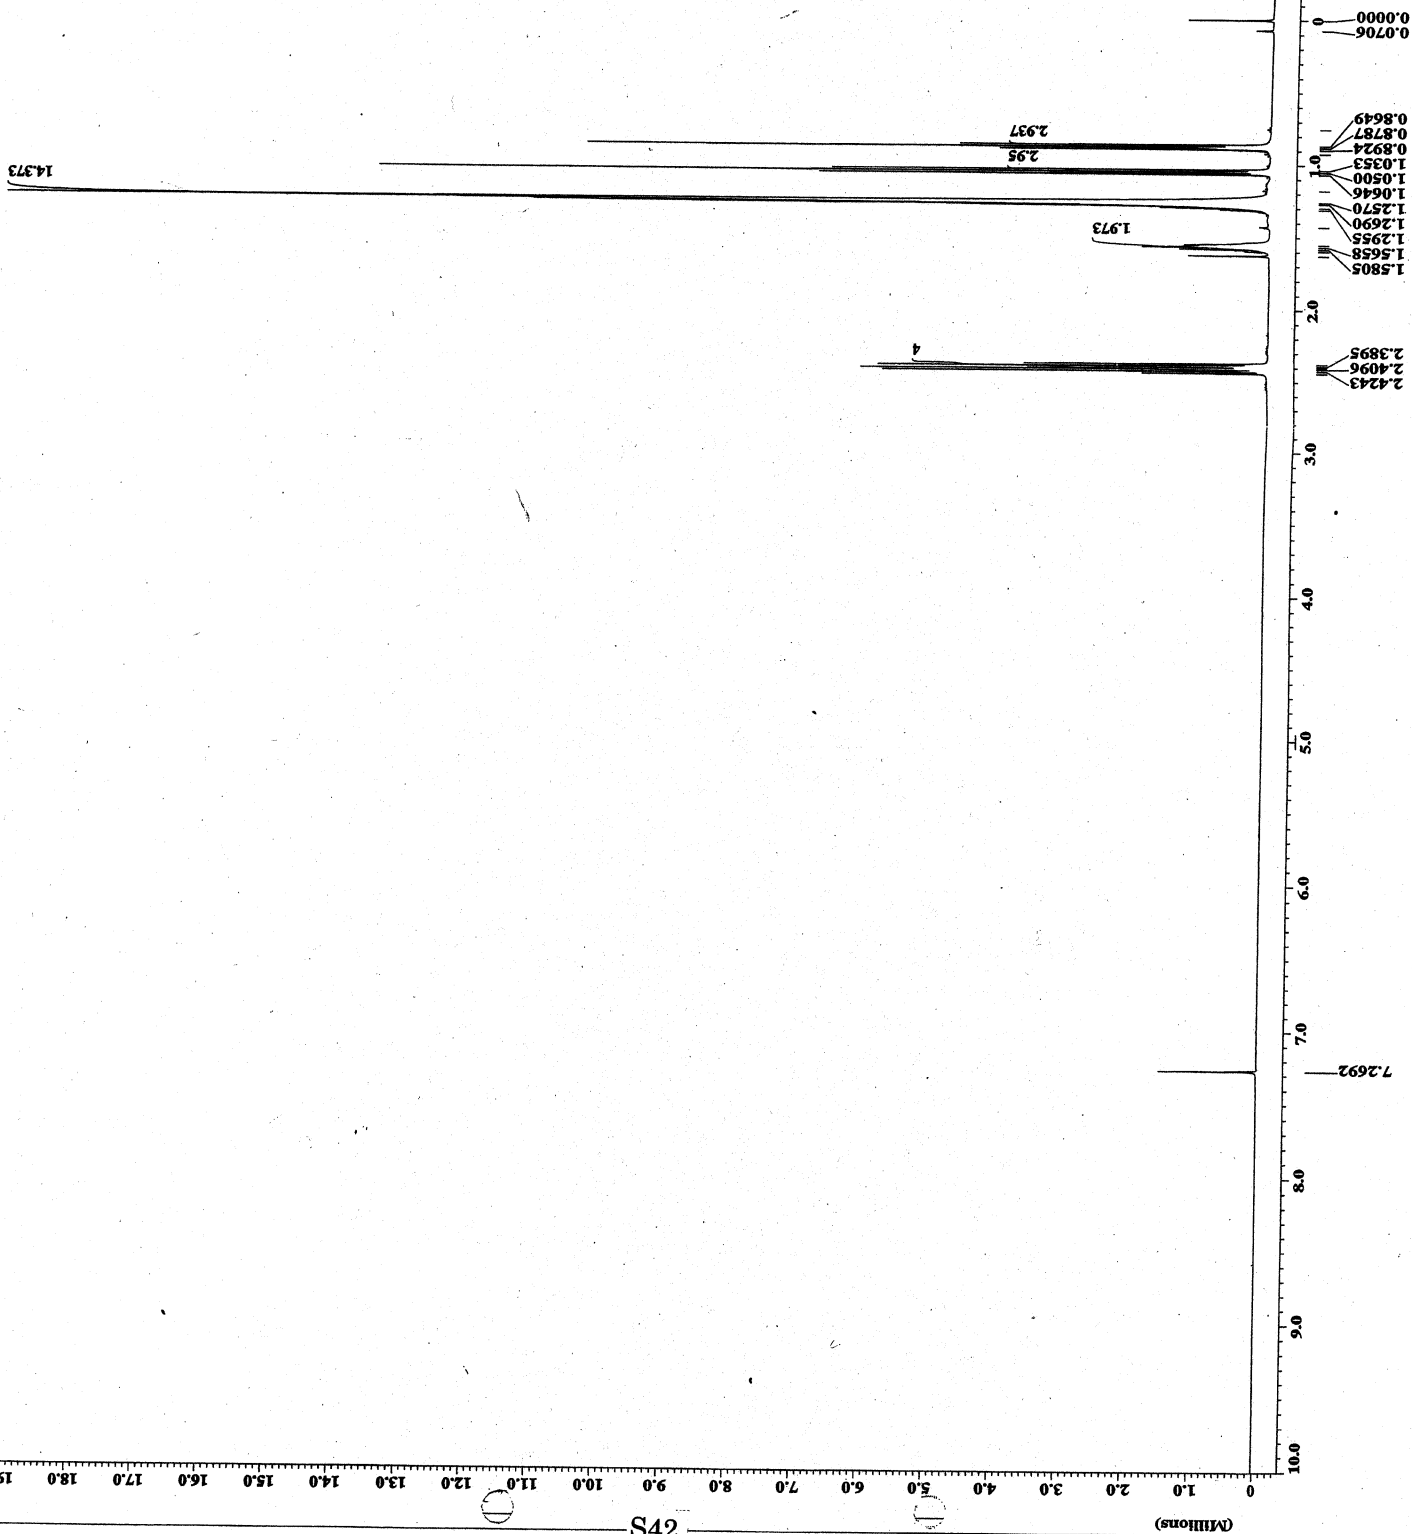

---- ACQUISITION PARAMETERS ----  
 File Name = 14\_13c\_spectrum.197  
 Author =  
 Sample ID = RSG-185-4rd-5  
 Content = Single Pulse with Broad  
 Creation Date = 28-JAN-2007 17:25:46  
 Revision Date = 30-JAN-2007 06:07:39  
 Spec Site = RCP500  
 Spec Type = MEXA\_MIR  
 Data Point = 10  
 Dimensions = 13c  
 Dim Title =  
 Dim Size = 32768  
 Dim Units = [ppm]  
 Dim Min = 400  
 Dim Max = 13c  
 X Domain = 13c  
 X Offset = 100 [ppm]  
 X Freq = 125.77787547 [MHz]  
 X Preset = 31.44654088 [MHz]  
 Solvent = CHLOROFORM-D  
 Spin Set = 13c  
 Temp Set = 25.6 [deg]  
 Recv Gain = 30  
 Field Strength = 11.7473579 [T]  
 Filter Mode = HETCORHET  
 Filter Width = 15.72064221 [MHz]

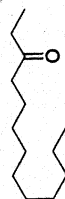

3m

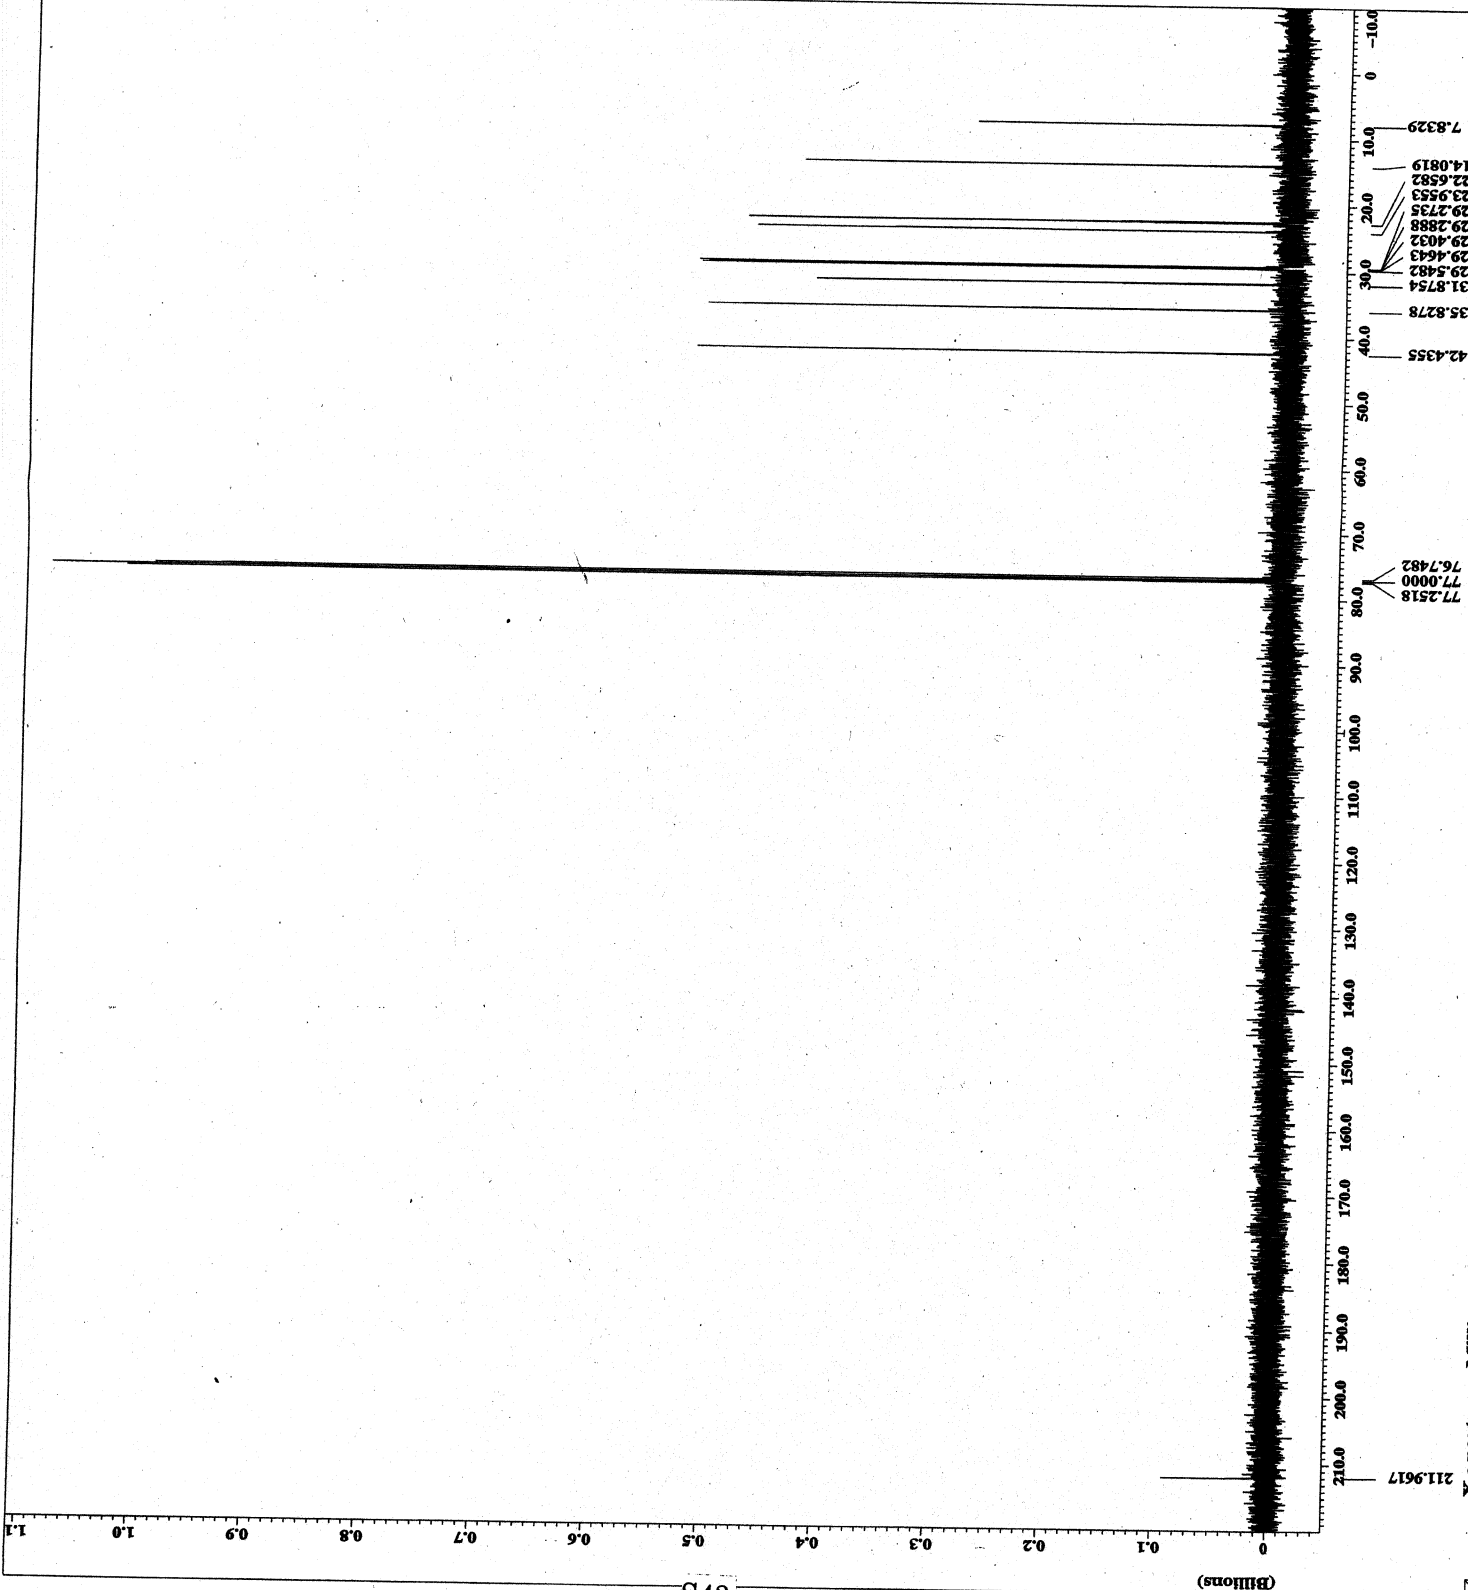

--- ACQUISITION PARAMETERS ---  
File Name = 1d\_spectrum\_6071  
Sample ID = RM-193-623  
Content = Single Pulse Experiment  
Creation Date = 10-MAR-2007 13:34:22  
Revision Date = 12-MAR-2007 09:02:57  
Spec Site = MCP500  
Spec Type = INVEX\_MSR  
Data Format = 1D COMETEX  
Dimensions = X  
Dim Size = 18  
Dim Units = [ppm]  
Scans = 8  
Acq\_return = 1  
X\_center = 18  
X\_offset = 50  
X\_sweep = 7.50750751 [Hz]  
Solvent = CHLOROFORM-D  
Spin\_get = 17 [Hz]  
Spin\_set = 24.1 [Hz]  
Recvr\_gain = 11.7473579 [V]  
Field\_strength = 11.7473579 [V]  
Filter\_mode = HETCORHETCOR  
Filter\_width = 3.75119936 [Hz]

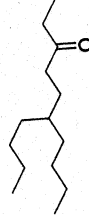

3n

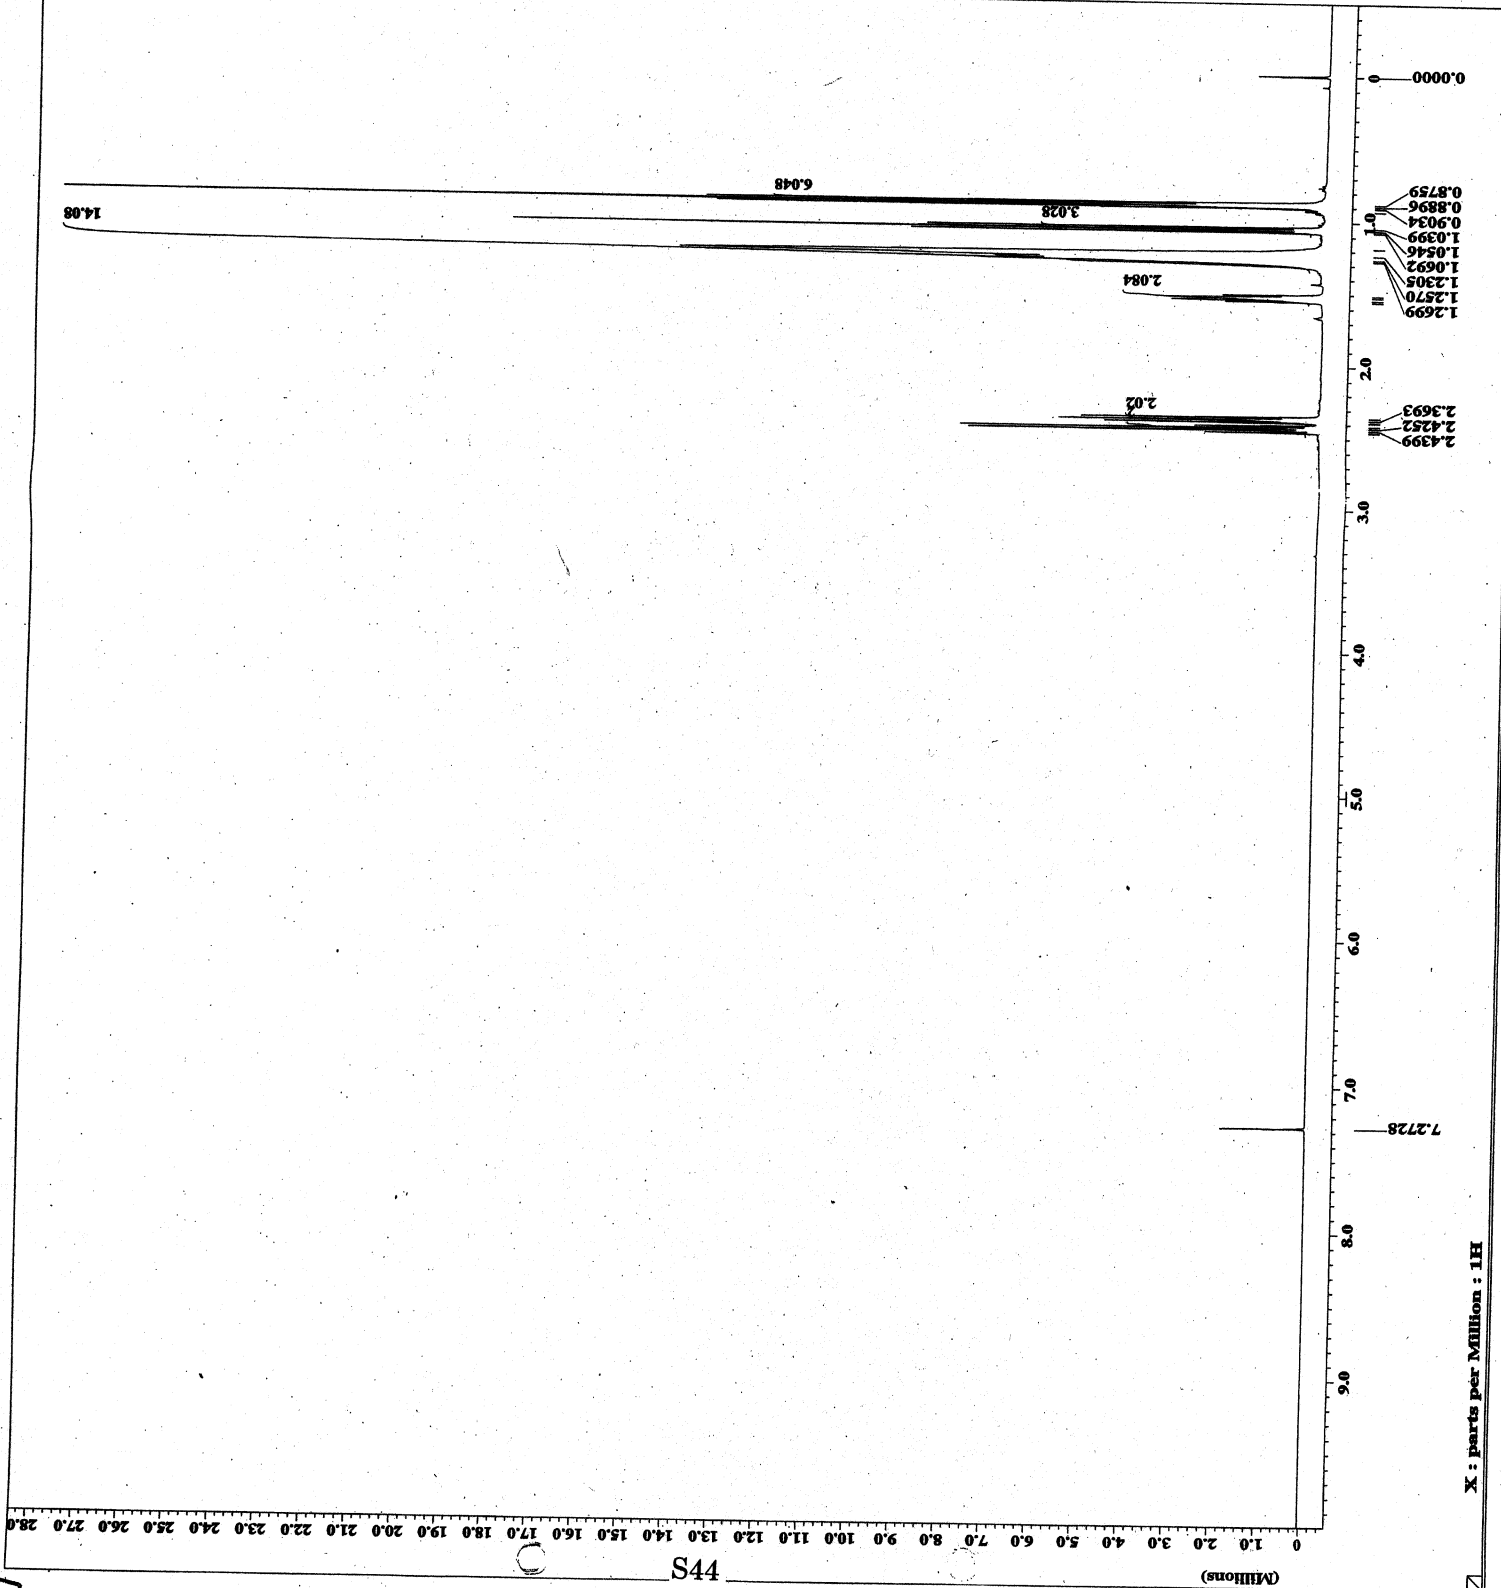

**ACQUISITION PARAMETERS**  
 File Name = 14\_13c\_spectrum.491  
 Author =  
 Sample ID = RSP-131-223  
 Comment = Single Pulse with Broad  
 Creation Date = 10-Mar-2007 13:49:28  
 Revision Date = 12-Mar-2007 09:16:52  
 Spec Site = RCP500  
 Spec Type = 1D COSY  
 Data Format = 1D COSY  
 Dimensions = 13C  
 Dia Title = 13C  
 Dia Size = 32768  
 Dia Units = 100  
 Sound = 1  
 Mod\_return = 1  
 X\_domain = 13C  
 X\_offset = 100 (ppm)  
 X\_range = 125.77787547 [MHz]  
 X\_resolution = 15.4654088 [Hz]  
 Solvent = CDCl3  
 Spin\_get = 16 [Hz]  
 Temp\_get = 25.6 [°C]  
 Temp\_set = 30  
 Field\_strength = 11.7473579 [T]  
 Pulse\_program = zgpg30  
 Filter\_mode = 1  
 Filter\_width = 15.72066231 [Hz]

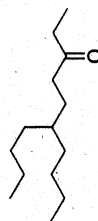

3n

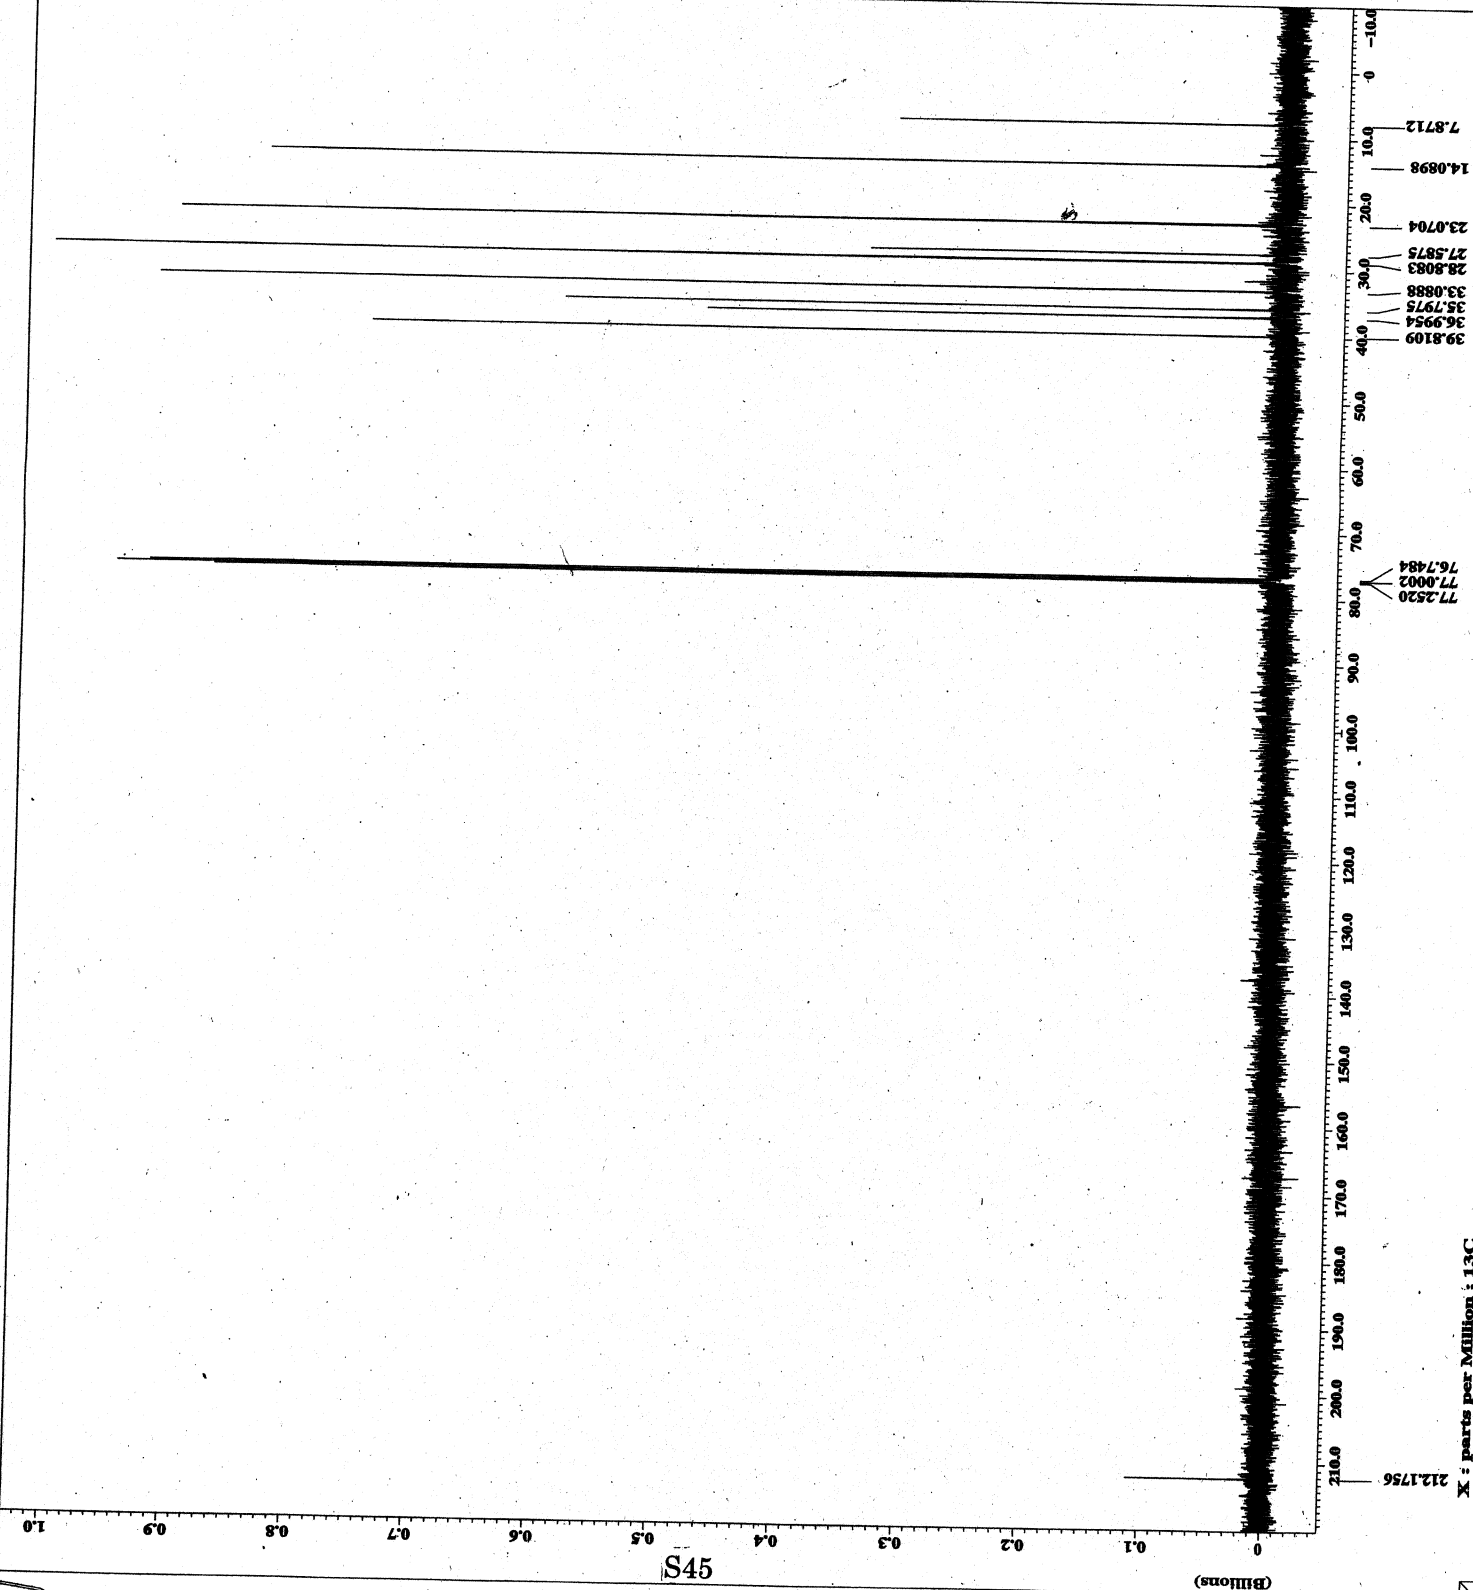

X : parts per Million : 13C

ACQUISITION PARAMETERS  
File Name = 1d\_spectrum\_4722  
Sample =  
Sample ID = BIP-188-544-7  
Content = Sample 188-544-7  
Creation Date = 8-22-2007 13:17:30  
Revision Date = 10-22-2007 07:12:16  
Spec Site = MCF500  
Spec Type = NMR  
Data Format = 1D COMPLEX  
Dimensions = 1  
Mix Site = 1884  
Mix Units = [ppm]  
Scans = 4  
Fid\_return = 1  
X\_domain = 1H  
X\_offset = 0  
X\_freq = 500.1364160 [MHz]  
X\_name = 7-20735791 [Hz]  
Solvent = CDCl3  
Spin\_get = 16 [Hz]  
Spin\_put = 24.5 [Hz]  
Recvr\_gain = 11.7473579 [V]  
Field\_strength = 11.7473579 [V]  
Filter\_mode = NOISEGATE  
Filter\_width = 3.75119936 [Hz]

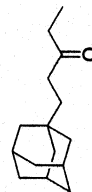

30

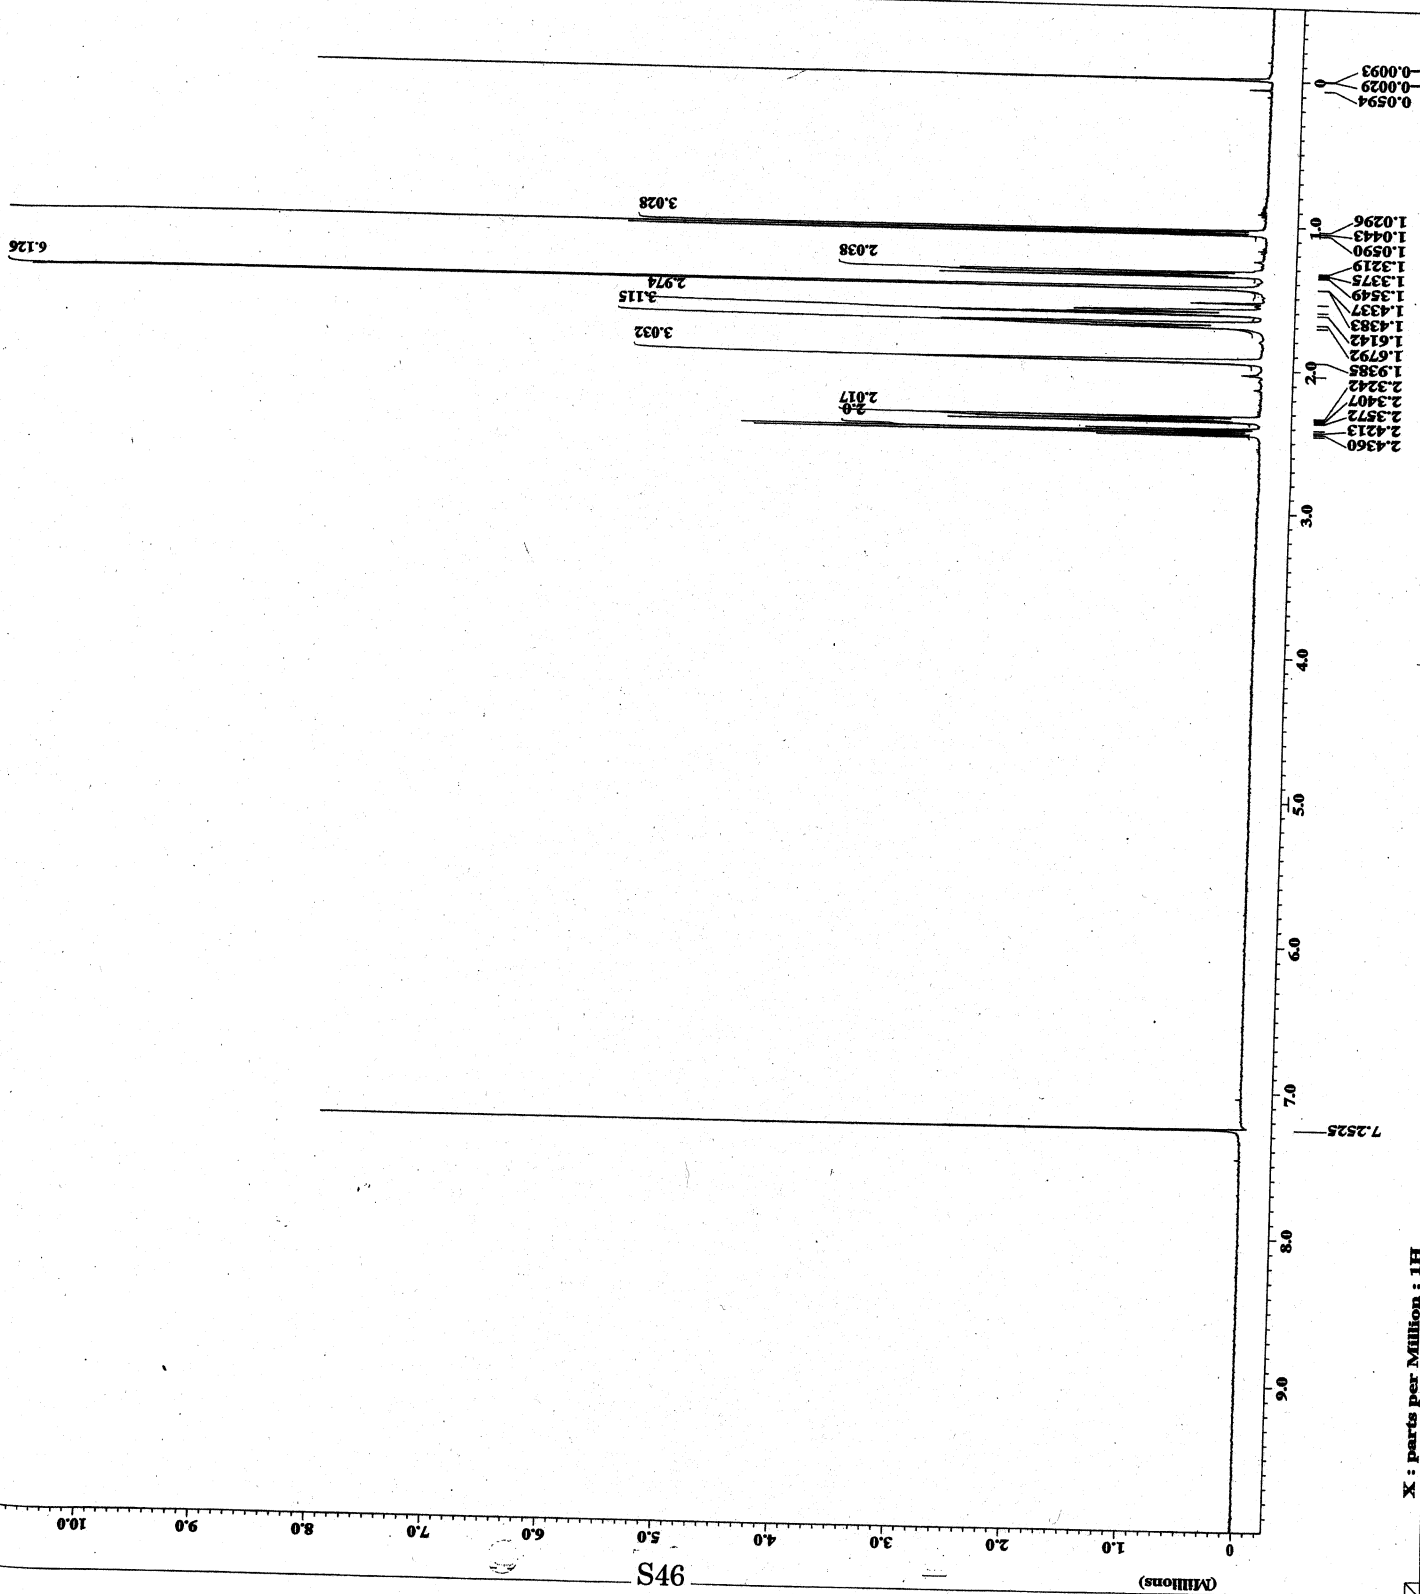

ACQUISITION PARAMETERS  
File Name = 1d\_13c\_spectrum.294  
Author =  
Sample ID = RM-189-474-7  
Content = Single Pulse with Broad  
Creation Date = 9-28-2007 14:36:57  
Revision Date = 11-28-2007 03:30:25  
Spec Site = RM300  
Spec Type = DELTA\_BK  
Data Format = ID COMPAK  
Dimensions = 1  
Dim Size = 13768  
Dim Units = [mm]  
Scans = 400  
Acq\_return = 1  
C1\_offset = 13C [ppm]  
X\_offset = 125.771447 [ppm]  
X\_freq = 31.44634088 [MHz]  
Solvent = CDCl3/CDCl3-D  
Spin\_set = 14 [Hz]  
Acq\_time = 25.2 [min]  
Nuc1 = 13C  
Field\_strength = 11.743759 [T]  
Filter\_mode = HORTZSCHMIDT  
Filter\_width = 15.72066221 [kHz]

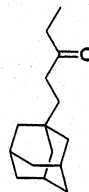

30

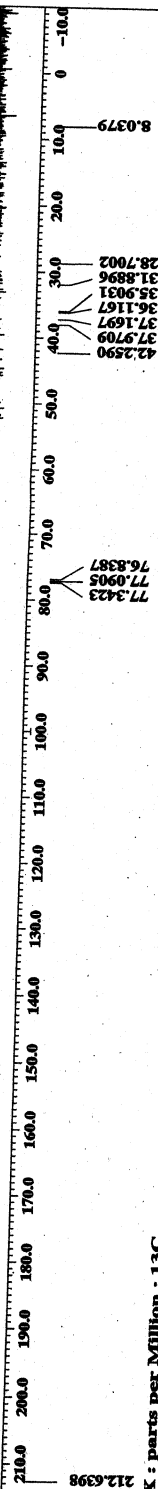

X : parts per Million : 13C

--- ACQUISITION PARAMETERS ---  
 File Name = id\_spectrum.5994  
 Filter ID =  
 Sample =  
 Content =  
 Creation Date = 8-MAR-2007 18:49:30  
 Revision Date = 10-MAR-2007 08:14:41  
 Spec Site = ECP500  
 Spec Type = NMR  
 Data Format = 1D COMPAK  
 Dimensions =  
 Dim Title =  
 Dim 1 =  
 Dim 2 =  
 Dim 3 =  
 Dim 4 =  
 Dim 5 =  
 Mod\_return =  
 X\_domain =  
 X\_offset =  
 X\_sweep =  
 Solvent =  
 Spin\_get =  
 Temp\_get =  
 Field\_strength =  
 Filter\_mode =  
 Filter\_width =

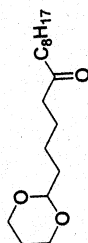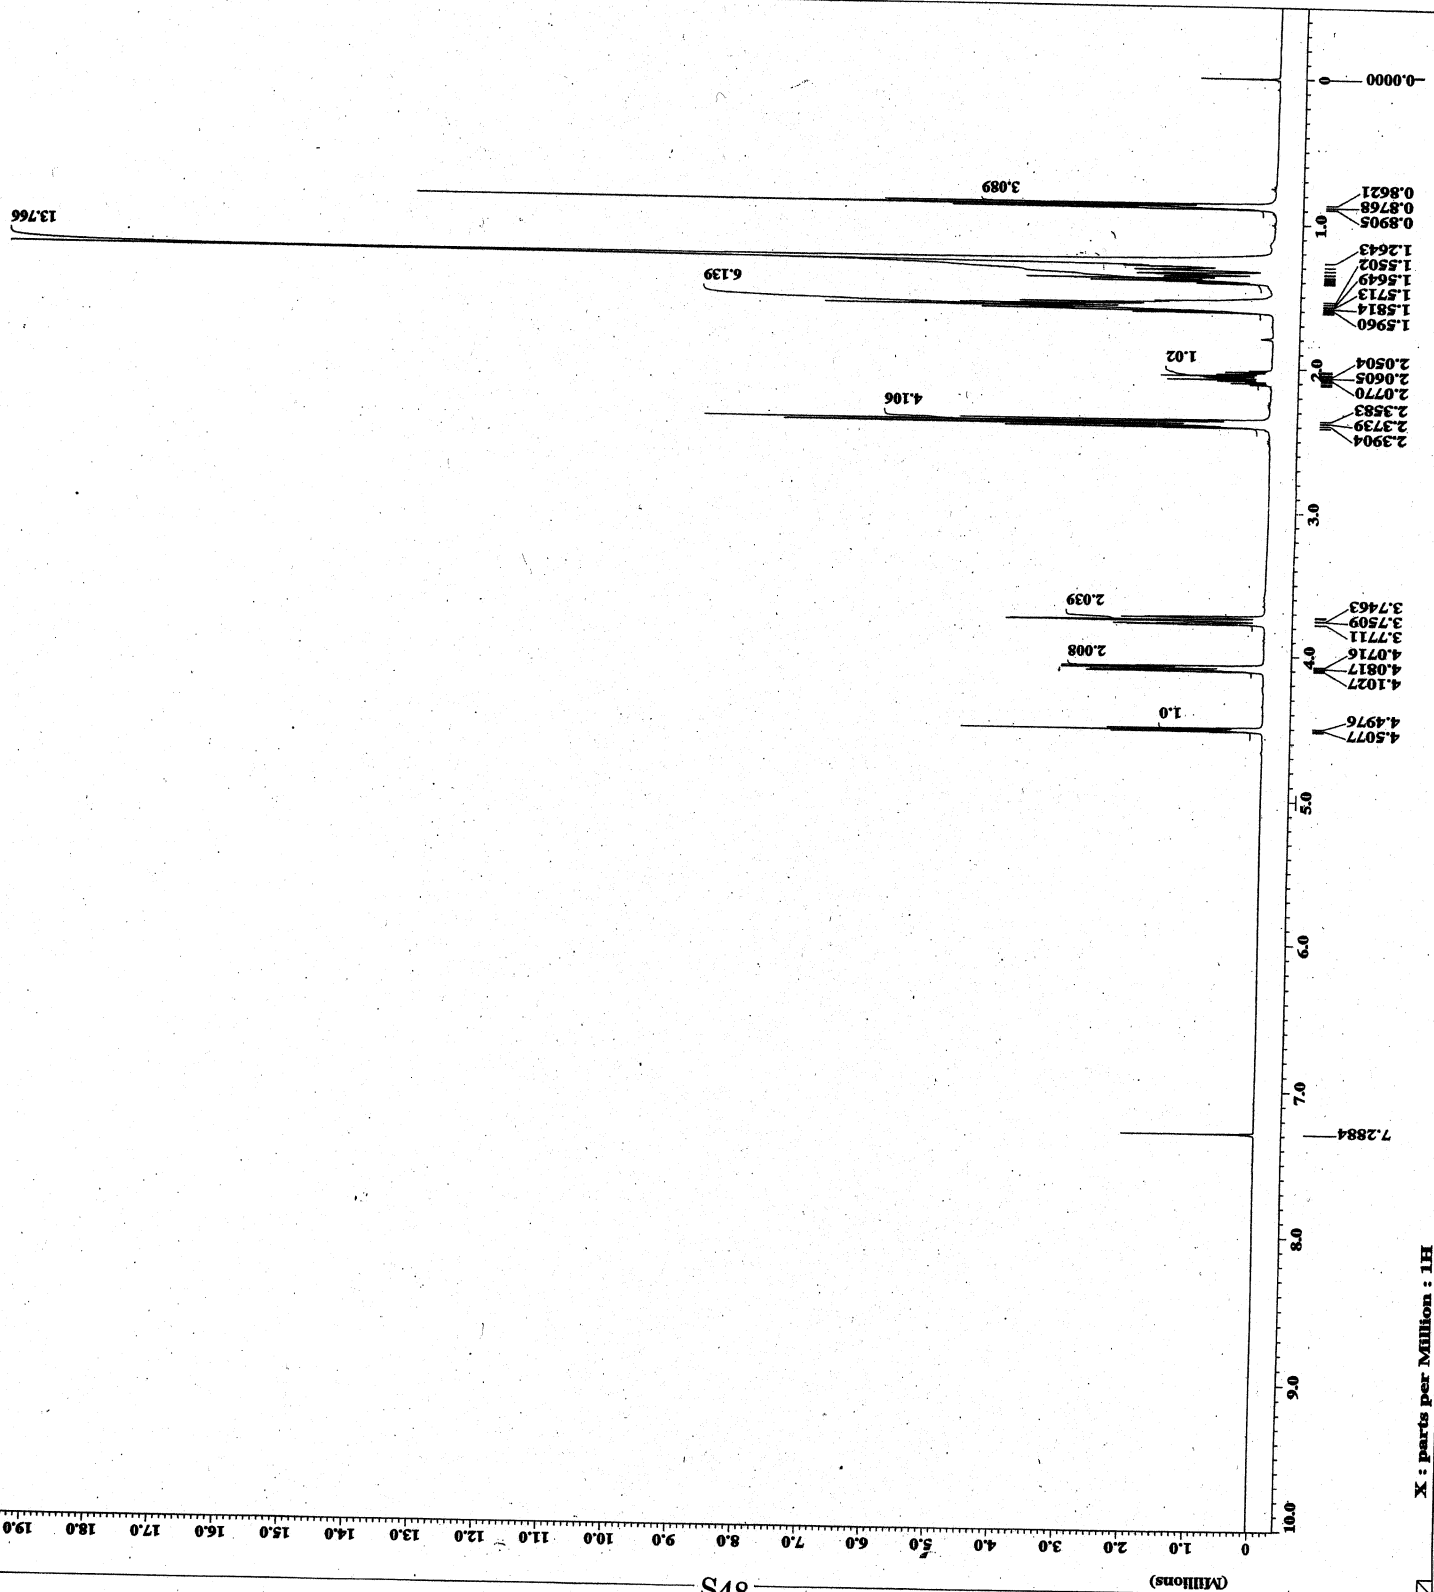



**ACQUISITION PARAMETERS**  
 File Name: 14\_13C\_spectrum.464  
 Author: R50-132-RVAC-Dr1  
 Sample ID: Single Pulse with Broad  
 Creation Date: 8-Mar-2007 19:05:55  
 Revision Date: 10-Mar-2007 09:31:23  
 Spec Site: RCT500  
 Spec Type: 13C  
 Data Format: 13C  
 Dimensions: 13C  
 Num Title: 13C  
 Num Size: 32768  
 Num Units: 13C  
 Num: 400  
 Mod\_return: 13C  
 X\_domain: 100 [ppm]  
 X\_offset: 125.77787547 [MHz]  
 X\_freq: 125.77787547 [MHz]  
 X\_gain: 31.44654088 [dB]  
 Solvent: CDCl3  
 Spin\_set: 15 [Hz]  
 Temp\_set: 25.3 [degC]  
 Field\_gen: 30  
 Field\_Coupling: 11.7473579 [Hz]  
 Filter\_Mod: 13C  
 Filter\_Width: 15.72066221 [kHz]

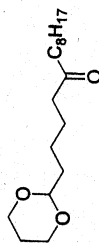

3d

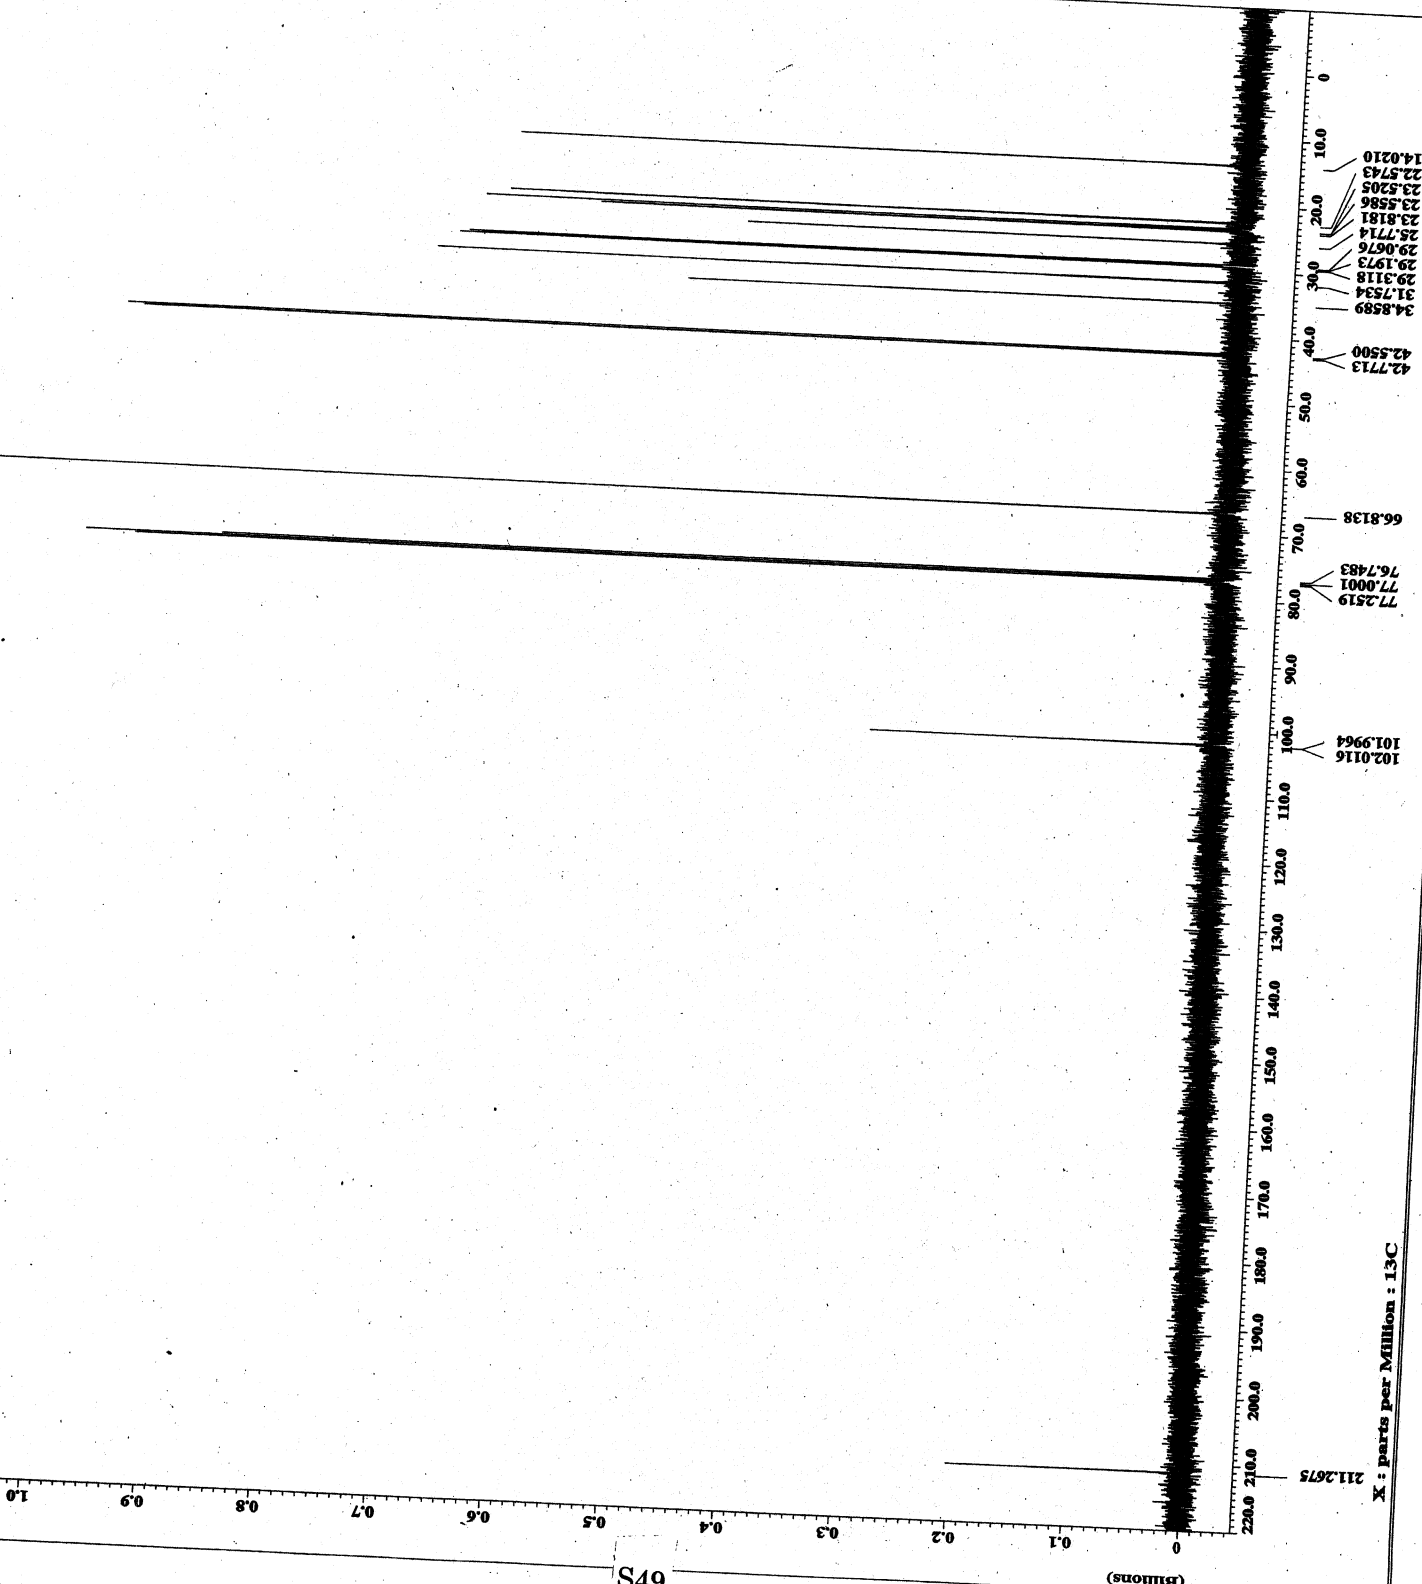

X: parts per Million : 13C

```

File Name      = 18.3
Acquisition Parameters
-
Sample         = RST-103-HVZ-4-254
Sample ID      = Single Pulse Experiment
Creation Date   = 23-Nov-2006 16:00:12
Version Date   = 21-Nov-2007 12:51:10
Spec Site      = MC3500
Data Path       = DATA_RAW
Data Format      = 1D COMPAK
Dimensions      = X
Min title       = 1E
Min title       = 1594
Min title       = 1594
Min title       = 8
Min title       = 8
Min title       = 8
Mod return      = 1
X domain        = 1E
X offset        = 5 [mm]
X sweep         = 7.0E-15241602 [Hz]
Y domain        = 1E
Y offset        = 7.0E-15241602 [Hz]
Y sweep         = 7.0E-15241602 [Hz]
Solvent         = CDCl3/NO2/CDCl3
Spin get        = 15 [Hz]
Pulse get       = 23.2 [deg]
Recf get        = 15
Recf get        = 23.2 [deg]
Filter strength = 15
Filter strength = 23.2 [deg]
Filter mode     = 3
Filter width    = 3.7471579 [Hz]
Filter width    = 3.7471579 [Hz]

```

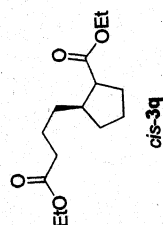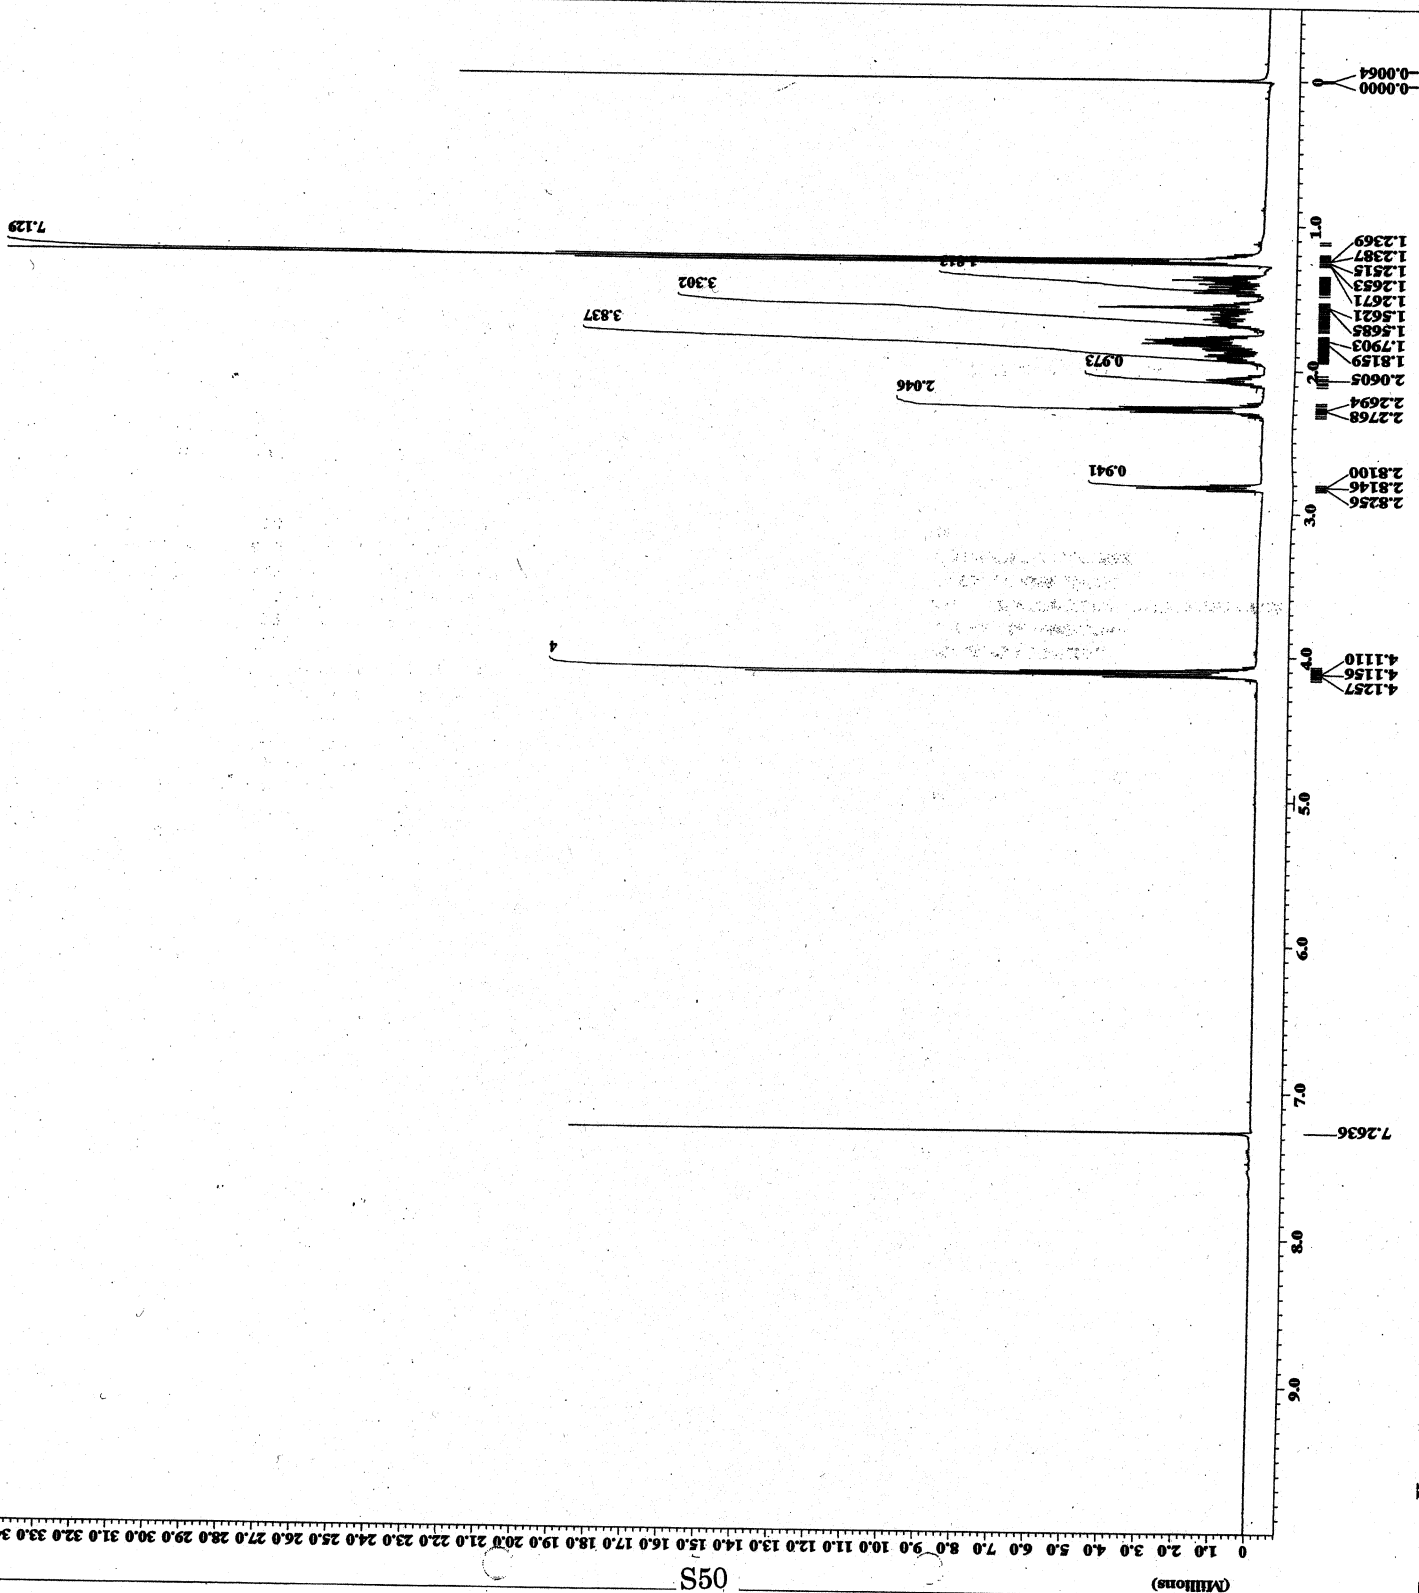

--- ACQUISITION PARAMETERS ---  
 File Name = 13C.1  
 Author =  
 Sample ID = MS-101-MPLC-4-fr4  
 Compound = Methyl Pile with Broad  
 Creation Date = 21-PM-2006 21:24:02  
 Revision Date = 28-MR-2007 13:44:58  
 Spec Site = MCP500  
 Spec Type = 13C NMR  
 Data Format = 1D COMPAR  
 Dimensions =  
 N1a Title = 13C  
 N1a Size = 32768  
 N1a Units = [ppm]  
 N1a Scan = 1  
 Mod\_return = 13C  
 X\_domain = 100 [ppm]  
 X\_offset = 125.77787947 [ppm]  
 X\_freq = 125.7684084 [ppm]  
 X\_solvent = CDCl3  
 Spin\_get = 14 [Hz]  
 Temp\_get = 23.4 [degC]  
 Recvz\_gain = 30  
 P1d1\_strength = 11.7473579 [V]  
 P1d1\_width = 15.72066221 [mm]  
 Filter\_width = 15.72066221 [mm]

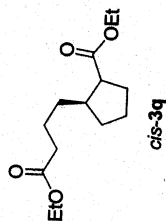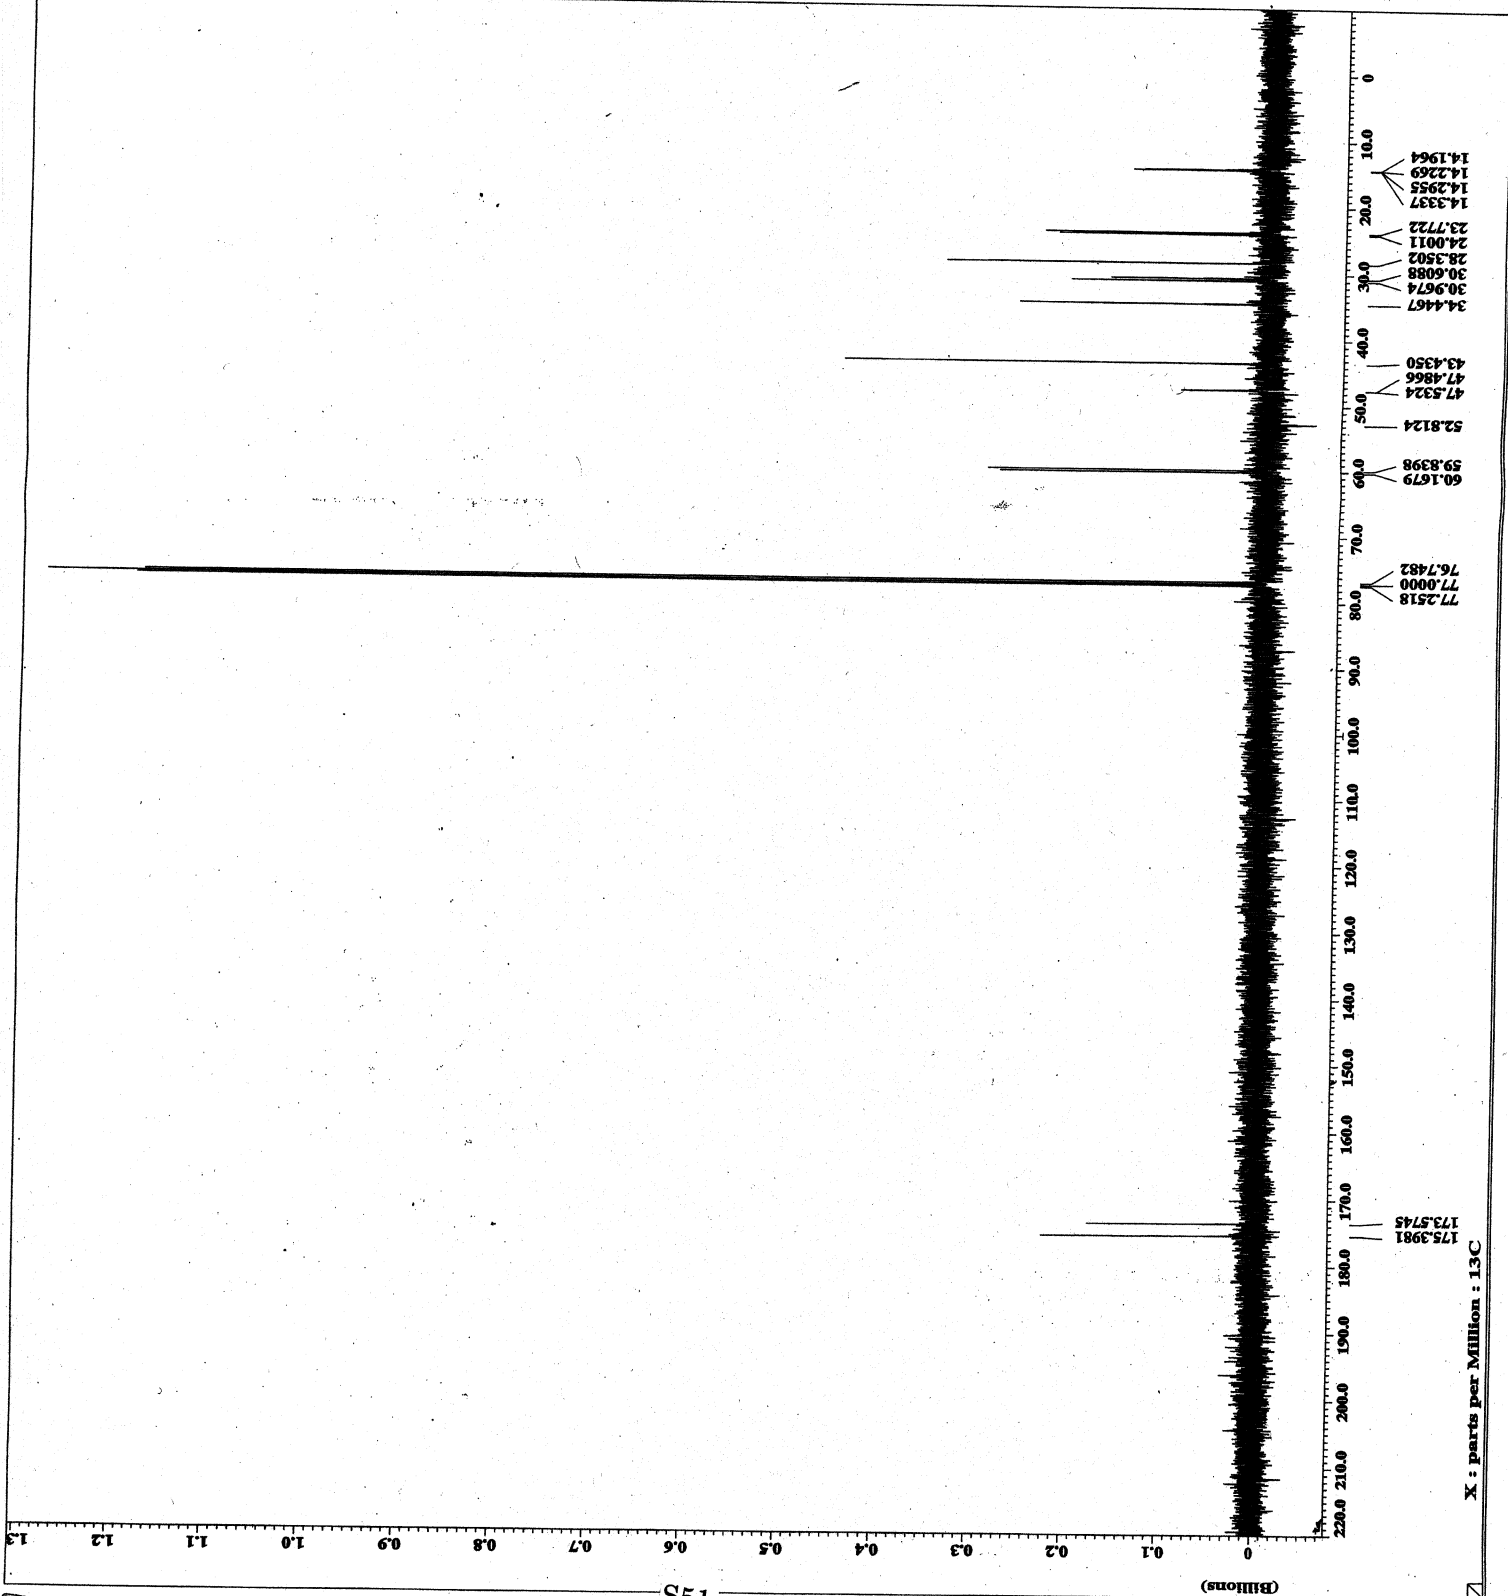

--- ACQUISITION PARAMETERS ---  
 File Name = E.2  
 Author =  
 Sample ID = RMP-103-2007-4-2-1  
 Creation Date = 23-02-2007 17:52:14  
 Revision Date = 28-02-2007 12:41:31  
 Spec Site = MCP500  
 Spec Type = NMR  
 Data Format = 1D  
 Dimensions = 1D  
 NMR Title = 1D  
 NMR Size = 16384  
 NMR Units = 1  
 Mod\_Return = 1  
 X\_domain = 1  
 X\_offset = 500.16241602 [Hz]  
 X\_freq = 500.1360751 [Hz]  
 Solvent = CDCl3  
 Spin\_get = 14 [Hz]  
 Temp\_get = 22.6 [°C]  
 Acq\_gain = 24  
 Filtration = 7473579 [Hz]  
 Filtration\_width = 3.75119936 [Hz]

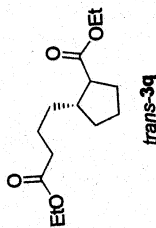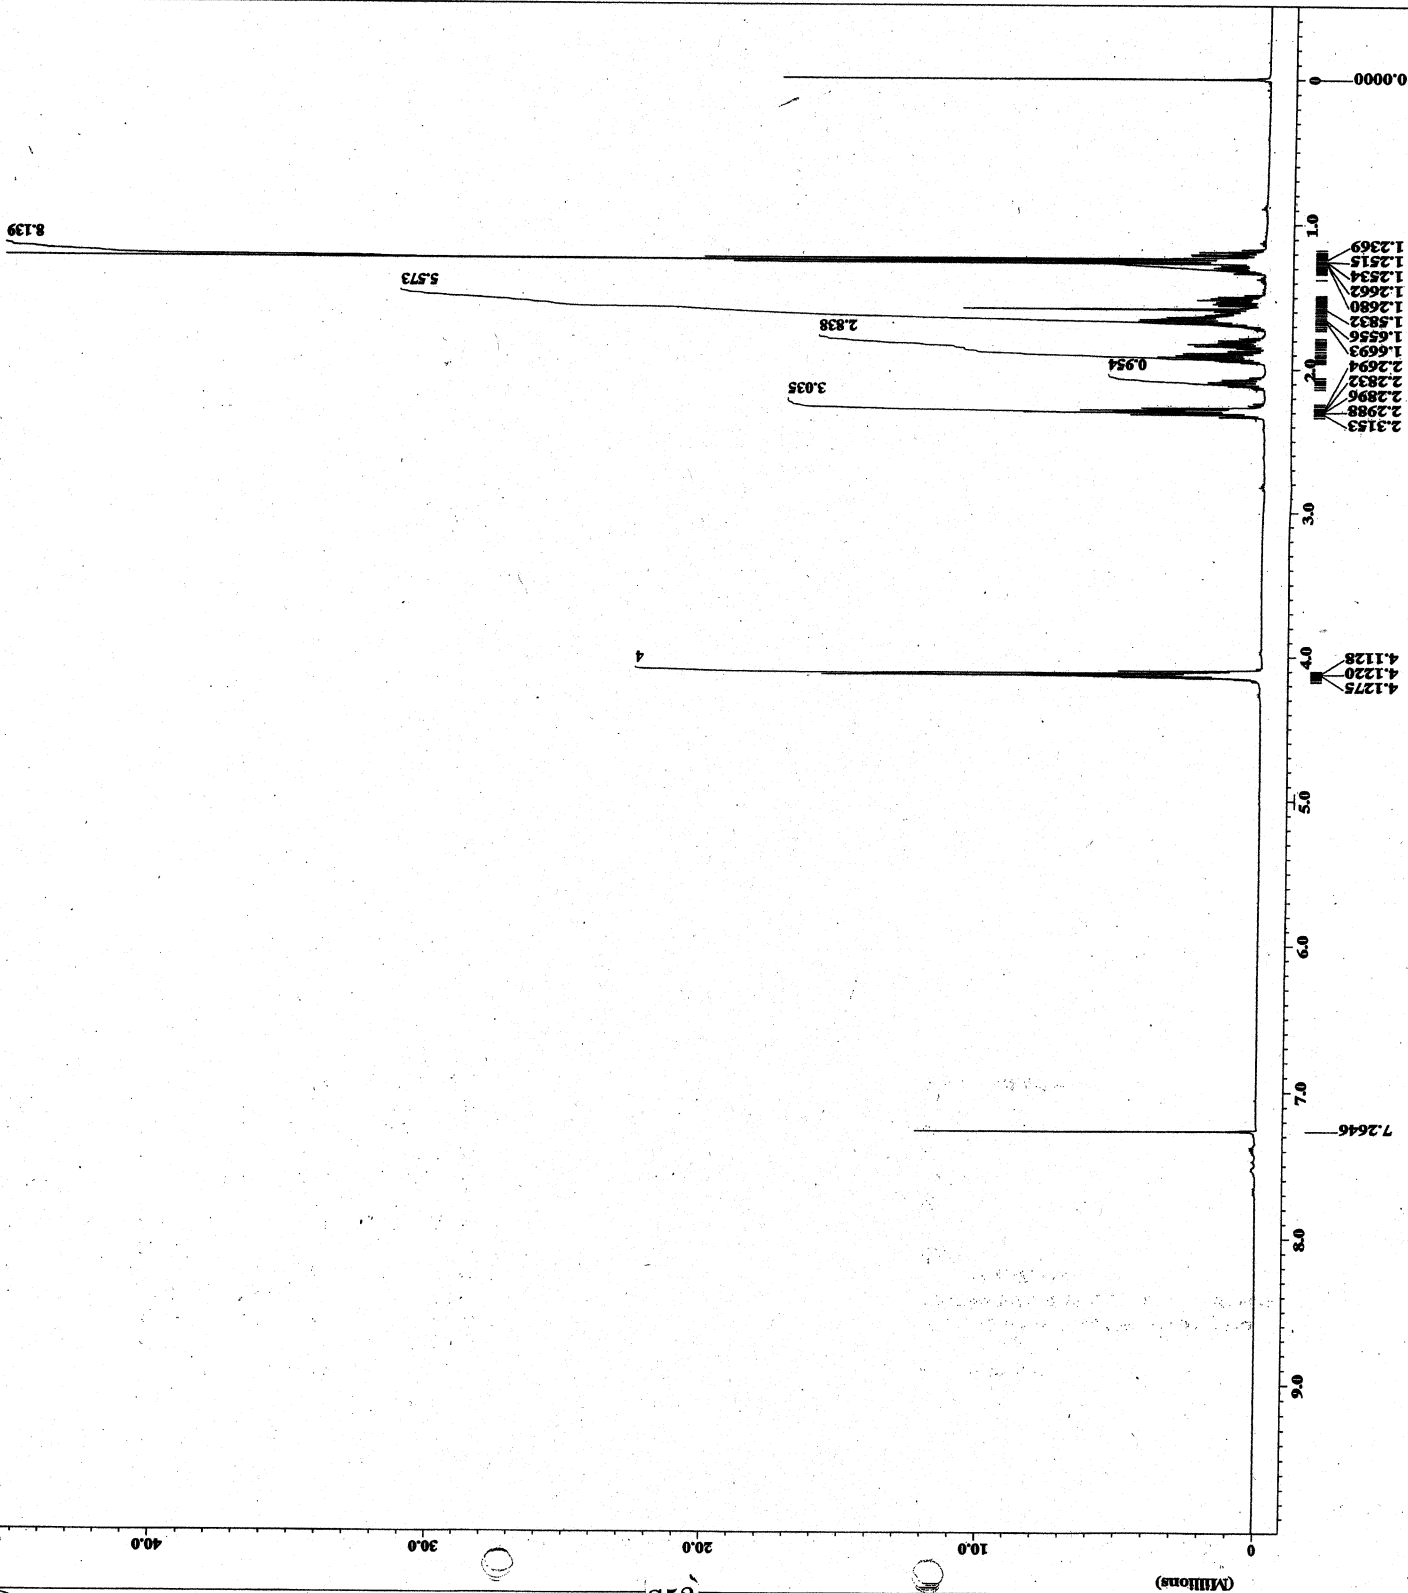

--- ACQUISITION PARAMETERS ---  
 File Name = C:\S  
 Author =  
 Sample ID = MSU-103-MSU04-fcl  
 Content = Single Pulse with Broad  
 Creation Date = 23-FEB-2006 21:04:38  
 Revision Date = 28-MAR-2007 12:57:28  
 Spec Site = MSU000  
 Spec Type = NMR  
 Data Format = ID COMPLEX  
 Data Name =  
 Data Size = 100  
 Data Units = [ppm]  
 Scans = 1000  
 Mod Return = 1  
 X Offset = 100  
 X Scale = 100  
 X Freq = 125.77777777777777 [MHz]  
 X Sweep = 31.44554088 [Hz]  
 Solvent = CHLOROFORM-D  
 Spin Get = 15 [Hz]  
 Spin Set = 15 [Hz]  
 Recv Gain = 30.1 [dB]  
 Field Strength = 11.7473579 [T]  
 Filter Mode = NOTREMOVED  
 Filter Width = 15.72066221 [kHz]

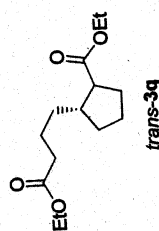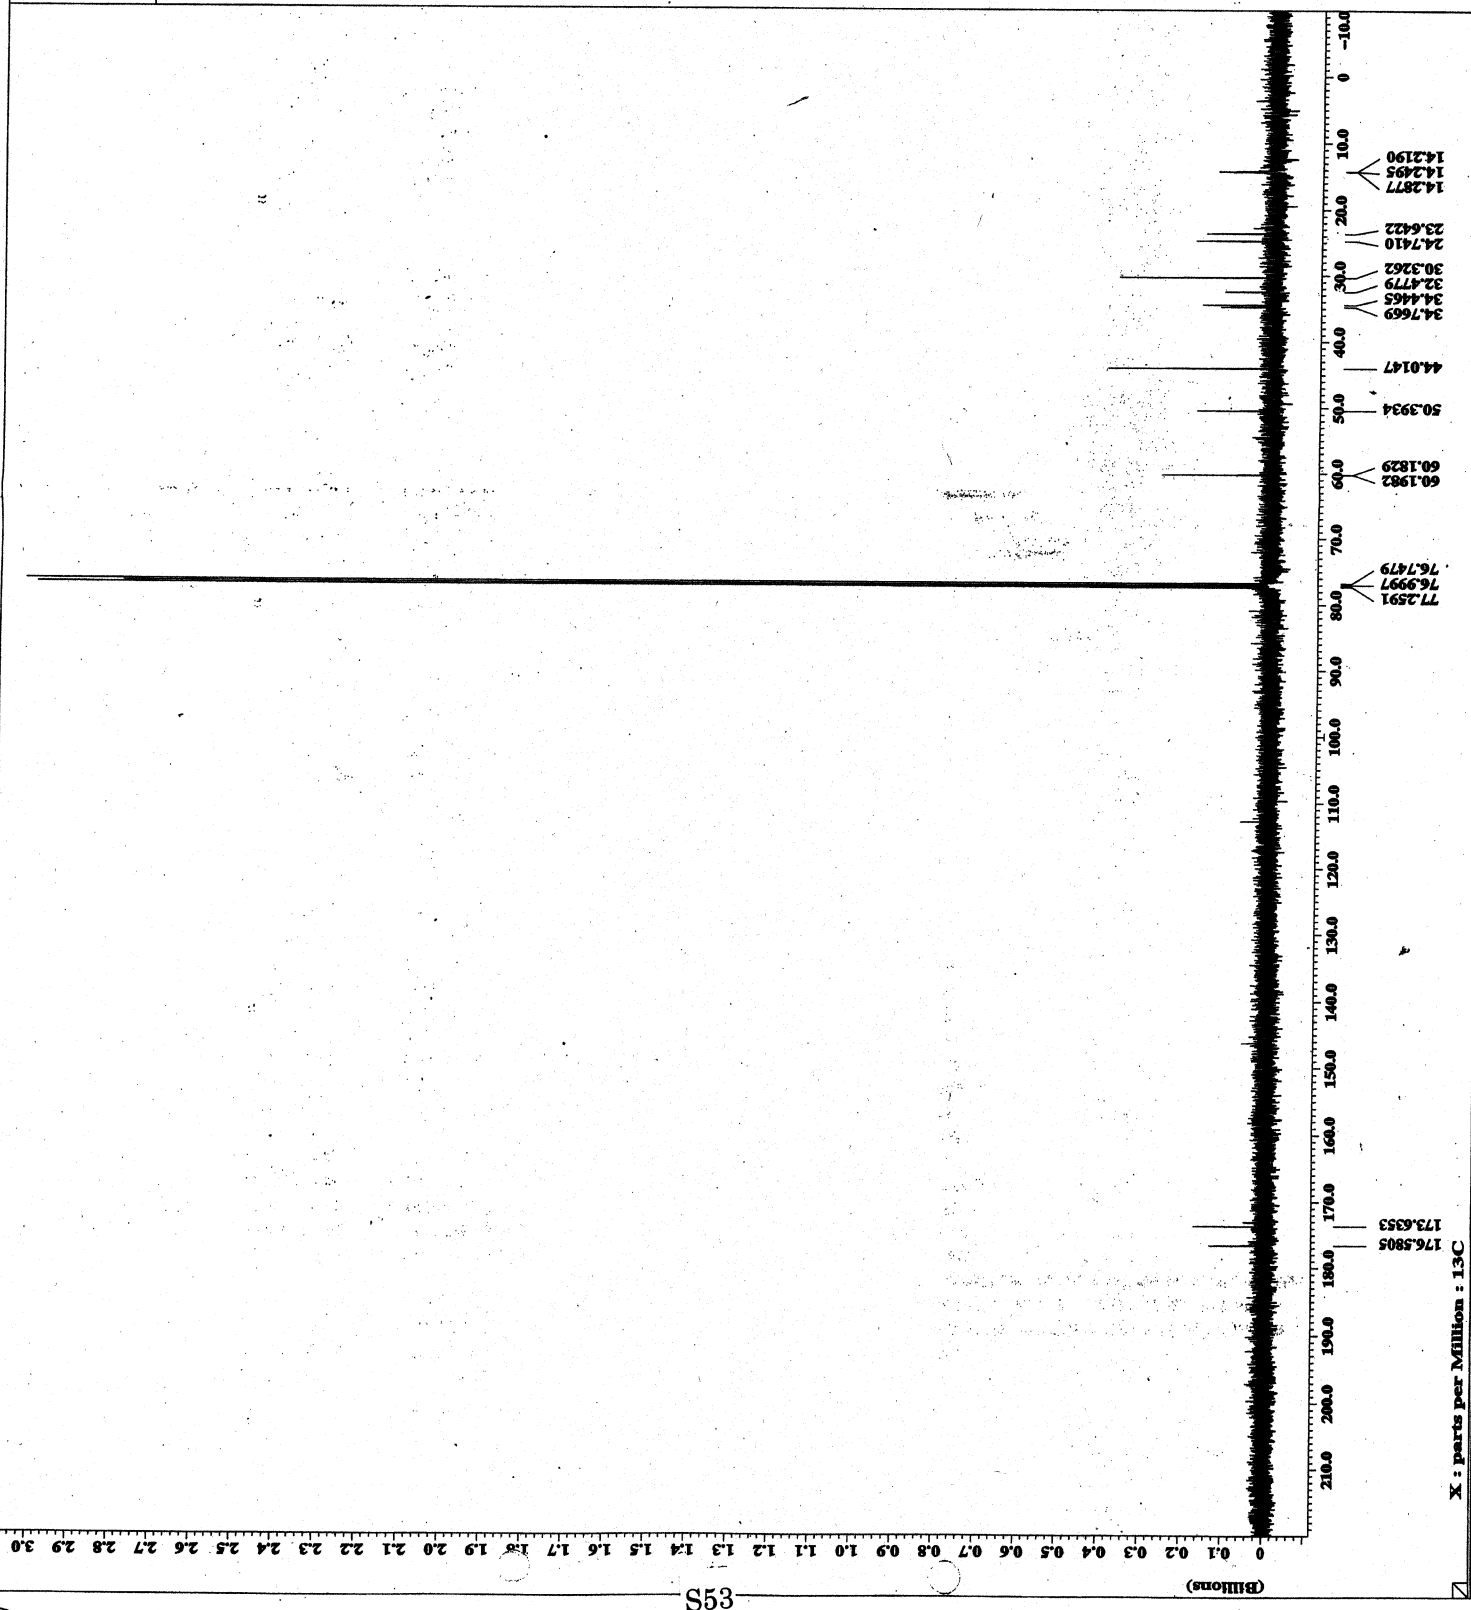

Supplement: Supplementary file 1 [file 4652488]
